# Supplementary material for: Effectiveness of different types and levels of social distancing measures: a scoping review of global evidence from earlier stage of COVID-19 pandemic
Source: PubMed Central journal article supplement — BMJ Open. 2022 Apr 10;12(4):e053938. doi: 10.1136/bmjopen-2021-053938 (PMC9002256; doi:10.1136/bmjopen-2021-053938), 2022-04-10
Supplement: bmjopen-2021-053938.draft_revisions.pdf [file bmjopen-2021-053938.draft_revisions.pdf]

# BMJ Open

BMJ Open is committed to open peer review. As part of this commitment we make the peer review history of every article we publish publicly available.

When an article is published we post the peer reviewers' comments and the authors' responses online. We also post the versions of the paper that were used during peer review. These are the versions that the peer review comments apply to.

The versions of the paper that follow are the versions that were submitted during the peer review process. They are not the versions of record or the final published versions. They should not be cited or distributed as the published version of this manuscript.

BMJ Open is an open access journal and the full, final, typeset and author-corrected version of record of the manuscript is available on our site with no access controls, subscription charges or pay-per-view fees (<http://bmjopen.bmj.com>).

If you have any questions on BMJ Open's open peer review process please email [info.bmjopen@bmj.com](mailto:info.bmjopen@bmj.com)

# BMJ Open

## Effectiveness of different types and levels of social distancing measures: a scoping review of global evidence from early to middle stage of COVID-19 pandemic

|                               |                                                                                                                                                                                                                                                                                                                                                                                                                                                                                                                                                                                                                                                                                                                                                                                                                 |
|-------------------------------|-----------------------------------------------------------------------------------------------------------------------------------------------------------------------------------------------------------------------------------------------------------------------------------------------------------------------------------------------------------------------------------------------------------------------------------------------------------------------------------------------------------------------------------------------------------------------------------------------------------------------------------------------------------------------------------------------------------------------------------------------------------------------------------------------------------------|
| Journal:                      | <i>BMJ Open</i>                                                                                                                                                                                                                                                                                                                                                                                                                                                                                                                                                                                                                                                                                                                                                                                                 |
| Manuscript ID                 | bmjopen-2021-053938                                                                                                                                                                                                                                                                                                                                                                                                                                                                                                                                                                                                                                                                                                                                                                                             |
| Article Type:                 | Original research                                                                                                                                                                                                                                                                                                                                                                                                                                                                                                                                                                                                                                                                                                                                                                                               |
| Date Submitted by the Author: | 29-May-2021                                                                                                                                                                                                                                                                                                                                                                                                                                                                                                                                                                                                                                                                                                                                                                                                     |
| Complete List of Authors:     | Sun, Kai Sing; The Chinese University of Hong Kong, The Jockey Club School of Public Health and Primary Care<br>Lau, Terence See-Man; The Chinese University of Hong Kong, The Jockey Club School of Public Health and Primary Care<br>Yeoh, EK; The Chinese University of Hong Kong, The Jockey Club School of Public Health and Primary Care<br>Chung, Vincent; The Chinese University of Hong Kong, The Jockey Club School of Public Health and Primary Care<br>Leung, Yin Shan; The Chinese University of Hong Kong, The Jockey Club School of Public Health and Primary Care<br>Yam, Carrie; The Chinese University of Hong Kong, The Jockey Club School of Public Health and Primary Care<br>Hung, Chi-Tim; The Chinese University of Hong Kong, The Jockey Club School of Public Health and Primary Care |
| Keywords:                     | COVID-19, EPIDEMIOLOGY, Infection control < INFECTIOUS DISEASES, Public health < INFECTIOUS DISEASES                                                                                                                                                                                                                                                                                                                                                                                                                                                                                                                                                                                                                                                                                                            |
|                               |                                                                                                                                                                                                                                                                                                                                                                                                                                                                                                                                                                                                                                                                                                                                                                                                                 |

SCHOLARONE™  
Manuscripts

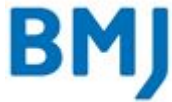

I, the Submitting Author has the right to grant and does grant on behalf of all authors of the Work (as defined in the below author licence), an exclusive licence and/or a non-exclusive licence for contributions from authors who are: i) UK Crown employees; ii) where BMJ has agreed a CC-BY licence shall apply, and/or iii) in accordance with the terms applicable for US Federal Government officers or employees acting as part of their official duties; on a worldwide, perpetual, irrevocable, royalty-free basis to BMJ Publishing Group Ltd ("BMJ") its licensees and where the relevant Journal is co-owned by BMJ to the co-owners of the Journal, to publish the Work in this journal and any other BMJ products and to exploit all rights, as set out in our [licence](#).

The Submitting Author accepts and understands that any supply made under these terms is made by BMJ to the Submitting Author unless you are acting as an employee on behalf of your employer or a postgraduate student of an affiliated institution which is paying any applicable article publishing charge ("APC") for Open Access articles. Where the Submitting Author wishes to make the Work available on an Open Access basis (and intends to pay the relevant APC), the terms of reuse of such Open Access shall be governed by a Creative Commons licence – details of these licences and which [Creative Commons](#) licence will apply to this Work are set out in our licence referred to above.

Other than as permitted in any relevant BMJ Author's Self Archiving Policies, I confirm this Work has not been accepted for publication elsewhere, is not being considered for publication elsewhere and does not duplicate material already published. I confirm all authors consent to publication of this Work and authorise the granting of this licence.

1  
2  
3 **Effectiveness of different types and levels of social distancing measures:**  
4 **a scoping review of global evidence from early to middle stage of COVID-19**  
5 **pandemic**  
6  
7  
8  
9

10  
11  
12  
13 Kai-Sing Sun<sup>1#</sup>, Terence See-Man Lau<sup>1#</sup>, Eng-Kiong Yeoh<sup>1\*</sup>, Vincent Chi-Ho Chung<sup>1</sup>, Yin Shan  
14 Leung<sup>1</sup>, Carrie Ho-Kwan Yam<sup>1</sup>, Chi-Tim Hung<sup>1</sup>  
15  
16

17  
18  
19 <sup>1</sup>The Jockey Club School of Public Health and Primary Care, The Chinese University of Hong Kong,  
20 Hong Kong, China  
21  
22

23  
24 **#Co-first authors**  
25  
26  
27  
28  
29  
30  
31

32 **\*Corresponding author:**  
33

34 Prof Eng-Kiong Yeoh  
35

36 Address: 2/F, School of Public Health Building, Prince of Wales Hospital, Shatin, Hong Kong  
37

38 Email: [yeoh\\_ek@cuhk.edu.hk](mailto:yeoh_ek@cuhk.edu.hk)  
39

40 Tel: (852) 2252 8702 Fax: (852) 2145 7489  
41  
42  
43  
44  
45  
46  
47  
48  
49  
50  
51  
52  
53  
54  
55  
56  
57  
58  
59  
60

## Abstract

**Objective:** Social distancing is the critical measure in the control of the COVID-19 pandemic before herd immunity can be achieved through effective vaccination of global populations. This scoping review aims to synthesize research findings on the effectiveness of different types and levels of social distancing measures from early to middle stage of COVID-19 pandemic.

**Design:** Scoping review.

**Data Sources:** Seven electronic databases were searched for eligible research studies on social distancing for COVID-19 published from beginning of the pandemic till October 2020.

**Study selection and data extraction:** The measures covered social distancing between individuals, school closure, workplace/ business closures, public transport restriction, “partial” lockdown and full lockdown. Effectiveness indicators included five aspects: 1) infectivity, 2) incidence, 3) mortality rate, 4) effect time, and 5) attendance.

**Results:** After screening 1288 abstracts and 8 additional articles from other sources, 34 studies were included for synthesis of findings. The review found that the outcomes of social distancing measures were mainly indicated by changes in  $R_t$ , incidence and mortality, along with indirect indicators such as daily contact frequency and travel distance. There was empirical evidence for the effect of social distancing at individual level. The evidence was also adequate for partial or full lockdown at community level. However, at the level of social settings, the evidence was inconsistent for school closure and public transport restriction as a single type of intervention. The evidence was also very limited for workplace/business closures.

**Conclusions:** In the community setting, there was stronger evidence on the combined effect of different social distancing interventions than for a single one. As fatigue of preventive behaviors is on the top of the public health agenda, future studies should analyze risk in specific settings such as eateries and entertainment to implement and evaluate measures which are proportionate to the risk.

**Keywords:** COVID-19, effectiveness, incidence, scoping review, social distancing

## Strengths and limitations of this study

- First scoping review to synthesize findings on the effectiveness of social distancing measures for COVID-19 at individual, social settings and national levels in a variety of outcome parameters.
- This review shows the amount of evidence for different types and levels of social distancing measures.
- Findings in varied outcome parameters could not be compared directly.
- Non-English literature was excluded from this review.

For peer review only

## Introduction

Social distancing is the most important measure to control the outbreak of COVID-19 worldwide before herd immunity can be achieved through effective vaccination (1). Social distancing, also known as physical distancing, is based on the premise that the rate of transmission of infectious diseases will decrease if people in communities stay at home from work or school, avoid large gatherings and refrain from having physical contact with one another. World Health Organization (WHO) guidelines describe social distancing measures at the individual level, e.g. keeping at least one meter from each other; at the community level generally, e.g. stay-at-home recommendation/ordinances; or in specific socio-economic settings e.g. measures for workplace, schools, eateries, entertainment and parties (2, 3). At the national or regional levels, lockdown or community quarantine may be imposed as an extreme form of social distancing (4, 5), where it can be total or “partial” when key socio-economic activities are restricted (6).

Despite the fact that social distancing measures have become a crucial strategy globally to mitigate COVID-19 pandemic, the evidence for their effectiveness is just slowly accruing. Earlier studies applied mathematical modelling to predict effectiveness of social distancing measures (7-10). Recent studies evaluated the outcomes retrospectively using empirical data and reported the outcomes in specific parameters. A study analyzed data from 149 countries suggested that implementation of any social distancing intervention was associated with an overall reduction in COVID-19 incidence of 13% (IRR 0.87, 95% CI: 0.85 - 0.89) (11). It concluded that data from 11 countries indicated similar overall effectiveness (pooled IRR 0.85, 0.81 to 0.89) when school closures, workplace closures, and restrictions on mass gatherings were in place (11). The European Centre for Disease Prevention and Control (ECDC) also estimated the effectiveness of different types of social distancing in Europe. While most were based on prediction modelling, some retrospective analysis showed that lockdown reduced  $R_t$  from around 2.7 to around 0.6 in the UK (12). Given the different types, variations and

1  
2  
3 combinations of social distancing measures were implemented at different levels in different  
4 jurisdictions and pandemic contexts, it is important to study what parameters and methods were used  
5 and what outcomes were measured in various research studies. This is critical in a protracted pandemic  
6 after continuing restrictions to self-determinants and socio-economic life, which have led to fatigue in  
7 preventive behaviors. In this context, targeted measures which have been evaluated proportionate to  
8 the risks should motivate continuing preventive behaviors.  
9  
10  
11  
12  
13  
14  
15  
16  
17  
18

19 The aim of this study was to synthesize research findings on the effectiveness of different types and  
20 levels of social distancing measures from early to middle stage of COVID-19 pandemic. The study  
21 was conducted as a scoping review to include a broad range of outcome parameters and study designs.  
22 This enables a better understanding the effectiveness of the spectrum of social distancing measures in  
23 controlling COVID-19 outbreak.  
24  
25  
26  
27  
28  
29  
30  
31  
32  
33  
34

## 35 **Methods**

36  
37  
38 The scoping review method was applied to include a range of parameters relating to effectiveness of  
39 social distancing measures during COVID-19 pandemic. In contrast to a systematic review which  
40 answers a specific and narrow question, a scoping review aims to explore a set of emerging and diverse  
41 themes to synthesize the current evidence, clarify conceptual parameters and identify gaps for further  
42 research (13-15).  
43  
44  
45  
46  
47  
48  
49  
50

## 51 **Eligibility criteria**

52 Inclusion criteria for this review were studies that described: 1) effectiveness or outcomes of social  
53 distancing measures targeting the general public; 2) social distancing measures including those  
54 between individuals; targeted measures on including closures of schools, workplaces, restaurants and  
55  
56  
57  
58  
59  
60



1  
2  
3 bars, and other social settings; stay-at-home recommendation or ordinances, community quarantine  
4 and lockdown; and 3) quantitative research, secondary data analysis, modelling studies based on  
5 empirical data, and review articles.  
6  
7  
8  
9

10  
11  
12 Exclusion criteria were: 1) qualitative studies, commentaries, mini-reviews without search strategies,  
13 editorials, conference presentations, dissertations, and book chapters); 2) non-English articles; 3)  
14 studies in healthcare settings, such as those on healthcare workers, hospital patients and elderly nursing  
15 homes; 4) studies on the impact of social distancing measures on non-COVID-19 diseases and  
16 psychosocial health of the public; and 5) hypothetical models *not* based on empirical data.  
17  
18  
19  
20  
21  
22  
23

### 24 25 26 **Search strategies and study selection**

27  
28 Seven electronic databases including AMED, Embase, Global Health, MEDLINE, Ovid Nursing  
29 Database, APA PsycInfo, Social Work Abstracts were searched by an experienced team member in  
30 scoping and systematic reviews. The search period was from the inception of the databases to 30  
31 September 2020. To enhance sensitivity, syntax of "*COVID\**".*m\_titl. AND social distan\*.ab* and  
32 "*COVID\**".*m\_titl. AND physical distan\*.ab* were used as search strategies to cover both terms of social  
33 physical and physical distancing. Furthermore, backward searches from the reference lists of the  
34 articles to locate additional articles and reports. The search and selection process followed the Joanna  
35 Briggs Institute Methods Manual for scoping reviews, and the reporting was guided by PRISMA  
36 Extension for Scoping Reviews (PRISMA-ScR)(16). Two reviewers independently screened the titles  
37 and abstracts to assess their eligibility. Full texts of potential citations were retrieved for detailed  
38 examination. Selection discrepancies were settled through discussions between these two reviewers.  
39  
40 Any outstanding disagreements were resolved by consulting the third member. We did not conduct  
41 risk of bias assessment, which is consistent with recommendations from the Joanna Briggs Institute  
42 Scoping Review Methods Manual and PRISMA-ScR (16). Different from a systematic review, a  
43  
44  
45  
46  
47  
48  
49  
50  
51  
52  
53  
54  
55  
56  
57  
58  
59  
60

1  
2  
3 scoping review aims to provide an overview of the existing evidence comprehensively, regardless of  
4  
5 risk of bias of included studies (16).  
6  
7  
8  
9

### 10 **Data extraction and synthesis**

11  
12 For each study included, texts under the headings of ‘results’ or ‘findings’ were extracted and analyzed  
13  
14 by two reviewers. The analysis was performed by one reviewer and verified by a second reviewer. The  
15  
16 two reviewers reached consensus upon the outcomes reported and the classification of their types of  
17  
18 social distancing and effectiveness indicators.  
19  
20  
21  
22  
23

### 24 **Patient and public involvement statement**

25  
26 It was not appropriate or possible to involve patients or the public in the design, or conduct, or  
27  
28 reporting, or dissemination plans of our research.  
29  
30  
31  
32

## 33 **Results**

### 34 **Study selection and characteristics**

35  
36 We screened 1288 abstracts from our electronic search on the databases with 2 additional research  
37  
38 reports being identified from governmental websites. Of the 95 full texts retrieved for further  
39  
40 assessment, 29 articles fulfilled our eligibility criteria. In addition, 6 relevant studies were identified  
41  
42 from the reference lists of the articles through backward searches. Hence, in total, 34 studies were  
43  
44 included in this review. Figure 1 presents results of the literature search and classification flow, and  
45  
46 Table 1 provides detailed characteristics of the selected articles.  
47  
48  
49  
50  
51  
52

53 (Insert Figure 1 and Table 1 here)  
54  
55  
56  
57  
58  
59  
60

1  
2  
3 There were 31 research studies and 3 reviews. Twelve studies reported data from North America,  
4 another 12 from Asia, 9 from Europe, 3 from South America and 1 from Australia. There were also 3  
5  
6 global studies which reported data from over 50 countries in multiple regions. According to the  
7  
8 classification by World Bank (15), 59.1% of the studies were from high-income countries/regions,  
9  
10 34.1% from middle-income and 6.8% from low-income countries/regions.  
11  
12  
13  
14  
15  
16

17 Table 2 summarizes the key findings based on the effectiveness indicators including the following  
18 aspects: 1) Infectivity:  $R_t$ , effective reduction number; 2) Incidence: infection incidence, ratio of  
19 incidence rate, attack rate, or bed occupancy rate; 3) Mortality or fatality rate; 4) Effect time: action  
20 and effect duration, time of reaching peak; 5) Attendance percentage of location, daily vehicles miles,  
21 daily contact frequency, mobility of leaving home, or travel distance. A description of each type of  
22 intervention is also given. A tick “✓” is put if no detailed elaboration was provided in the reviewed  
23 articles.  
24  
25  
26  
27  
28  
29  
30  
31  
32  
33  
34

35 (Insert Table 2 here)  
36  
37  
38  
39

### 40 **Social distancing at individual level**

41  
42

43 Social distancing measure was usually achieved by the prohibition of mass gathering in public areas  
44 and/ or maintaining certain physical distance between people. Most studies reported a positive  
45 relationship between the transmission risk and certain level of social distancing. A meta-analysis  
46 including seven studies on COVID-19 concluded that physical distancing of 1 meter or more was  
47 effective to reduce the transmission risk by 5 times and the protective impact was double for every  
48 extra meter (17). Similarly, based on the chronological data on interventions in 41 countries between  
49 January and May 2020, Brauner et al. (18) estimated that  $R_t$  reduced by 36%, 28% and 12% when  
50 gatherings were limited to 10, 100 and 1,000 people respectively. Furthermore, studies also found how  
51  
52  
53  
54  
55  
56  
57  
58  
59  
60

1  
2  
3 mobility changed according to different social distancing measures. A study by Weill et al. (19) in the  
4 U.S. found that median distance traveled, retail and recreation locations visited by a mobile device per  
5 day showed a sharp decrease in March 2020 after the implementation of social distancing measures in  
6 the country, while percentage of completely staying at home doubled. Another US study by Clipman  
7 et al. (20), in Maryland, found that history of COVID-19 infection was significantly less likely among  
8 the public who always practised social distancing (aOR for indoor social distancing, 0.32 [95% CI,  
9 .10–.99]; aOR for outdoor social distancing, 0.10 [95% CI, .03–.33]), giving some hints on the  
10 implications of mobility during the pandemic. However, social distancing in different settings may  
11 have different impacts. The UK Scientific Advisory Group for Emergencies (SAGE) meeting report  
12 (21) suggested that stopping contact from different households would provide moderate impact by  
13 reducing  $R_t$  of 0.1-0.2 but the impact of physical distancing on outdoor gathering was minimal ( $R_t$   
14 reduction  $<0.05$ ) since good ventilation was usually observed.  
15  
16  
17  
18  
19  
20  
21  
22  
23  
24  
25  
26  
27  
28  
29  
30  
31  
32  
33  
34

## 35 **Social distancing at level of community settings**

### 36 *School closure*

37  
38 School closure may have benefits during the pandemic, but the effectiveness was mixed when  
39 considering levels of closures and the unexpected link between school closure and school opening.  
40 Rivkees's (22) study in Florida of the U.S. found that closing schools resulted in a 40-55% reduction  
41 in average distance traveled compared with pre-outbreak levels. Moreover, Auger et al. (23) found that  
42 the primary and secondary school closure in the U.S. between March and May 2020 was associated  
43 with decreased COVID-19 incidence (adjusted relative change per week, -62%) and mortality (-58%).  
44 On the other hand, the SAGE report (21) suggested that closing secondary schools and further  
45 education could have more impact, even though a moderate  $R_t$  drop of 0.1 – 0.5 was associated with  
46 mass school closure, as mature students worked in daytime and linked up infection pathways between  
47  
48  
49  
50  
51  
52  
53  
54  
55  
56  
57  
58  
59  
60

1  
2  
3 workplace and households. It was also proposed that states closing schools earlier, when cumulative  
4 incidence of COVID-19 was low, had the largest relative reduction in incidence and mortality,  
5  
6 although there might be confounding effects from other interventions (24). Contrary to expected  
7  
8 impacts of school closures, observational data in ECDC review suggested that re-opening schools had  
9  
10 not been associated with significant increases of community transmission (12).  
11  
12  
13  
14  
15  
16  
17

### 18 ***Workplace measures***

19  
20  
21 Workplace measures include work-from-home arrangement, measures in working environment and  
22 the closure of businesses. The SAGE report (21) suggested a moderate impact of work-from-home  
23 measure, with a reduction of  $R_t$  between 0.2 and 0.4. Brauner et al. (18) estimated that a 29%  $R_t$   
24 reduction was likely to follow with closing most of non-essential businesses while closing high risk  
25 businesses, e.g. bars and restaurants would be associated with a  $R_t$  decline of 20%.  
26  
27  
28  
29  
30  
31  
32  
33  
34  
35

### 36 ***Public transport restriction***

37  
38  
39 Public transport restriction refers to suspension/ limitation of intra-city or intercity public  
40 transportation. The SAGE report (21) suggested a low to moderate impact following the 5-mile travel  
41 restriction, especially when local outbreak was widespread. It might be because public transport  
42 crowding was low and mandated face-mask policy was already implemented. However, Islam's study  
43 (11) showed no difference in reduction with or without the suspension of public transportation. On the  
44 other hand, ECDC review showed contradictory results, with a modelling study indicating a strong  
45 association with reduction of  $R_t$  while other studies did not show any impact unless introduced with  
46 other NPIs such as social distancing and behavioral changes (12). Therefore, it is difficult to relate  
47  
48 observed changes in transmission dynamics to this single measure of public transport restriction.  
49  
50  
51  
52  
53  
54  
55  
56  
57  
58  
59  
60

## **Social distancing at national/regional level**

### ***Combination of interventions - “partial” lockdown***

While the studies mentioned above focused on the effect of single type of intervention, many studies showed the effect of a combination of interventions, which could be regarded as a “partial” lockdown. A study by Siedner et al. (24) in the U.S. found that the mean daily COVID-19 case growth rate fell by 0.9% per day, starting 4 days after implementation of the first statewide social distancing measures including cancellation of public events, travel restriction, school and workplace closures. A drop of 2% in daily COVID-19-attributed mortality growth rate was also observed after 7 days the measures were implemented. Similarly, a study by Wan et al. (25) in Mainland China excluding Hubei (province of Wuhan) found that  $R_t$  has dropped sharply from 3.34 on 20 January 2020 to 0.89 on 31 January 2020 after implementing integrated control strategies. In Du’s study (26) of 58 cities in China, also with a remarkable  $R_t$  drop, at 54.3%, demonstrating the effectiveness after the implementation of multiple types of interventions.

### ***Full lockdown***

Indeed, a full lockdown can be viewed as a combination of all measures. Islam et al. (11) reported a combination of 4 measures, including restrictions on mass gatherings, school closures, workplace closures, and lockdowns in 32 countries, were associated with decreasing incidence of COVID-19 (pooled incident rate ratio, IRR 0.87, 0.84 to 0.91). Similar declining incidence was also observed when public transport closure was added (pooled IRR 0.85, 0.82 to 0.88; n=72 countries). Other than incidence drop, bed occupancy could be also benefited from lockdown measures. In Lino’s study (5), before the lockdown, the bed occupancy rates for referred COVID-19 cases in a tertiary hospital in Fortaleza of Brazil were over 100% in the beginning of May and reached nearly 140% after 10 days. The rates decreased to below 100% and 85% at 14 and 23 days respectively after the lockdown.

1  
2  
3  
4  
5  
6 More evidence showed the effect of lockdown by various indicators. Zhang et al. (27) found that an  
7  
8 average daily number of contacts per survey participant significantly dropped from 14.6 to 2 and 18.8  
9  
10 to 2.3 in Wuhan and Shanghai respectively during the lockdown period, consistent with the respective  
11  
12 trends of mobility data declining at 86.9% and 74.5%. Pan et al. (28) analyzed data from Wuhan and  
13  
14 found that the  $R_t$  gradually reduced from larger than 3 in January 2020 to less than 1 in February 2020  
15  
16 and fell further to less than 0.3 in March 2020 after the city lockdown. Similarly, a brief report of  
17  
18 Rivkees et al. (22) showed that the stay-at-home order in Florida of the U.S., after the first month of  
19  
20 implementation, resulted in a 74% to 82% reduction in person-to-person encounters, 55% in visits to  
21  
22 non-essential venues and 45% in overall distance traveled. After two months of implementing stay-at-  
23  
24 home order, the average distance traveled within the state was also found to decrease by 25-40%.  
25  
26 Further, a modelling study of Brauner et al. (18) gathering data of 41 countries using NPIs estimated  
27  
28 that stay-at-home orders (with exemptions) reduced the mean percentage of  $R_t$  by 10%. Moreover, in  
29  
30 SAGE report (21), it suggested that the country lockdown was very impactful and could reduce  $R_t$   
31  
32 from 2.7 to 0.6 while 2-3 week short stay-at-home order had moderate impact in reducing  $R_t$  to below  
33  
34 1. As with all other measures, the earlier the stay-at-home order was implemented, the higher the  
35  
36 impact.  
37  
38  
39  
40  
41  
42  
43  
44  
45  
46

### 47 **Implementation points of time and impact on the pandemic curve**

48  
49 Nearly all findings found that a timely implementation of measures could reduce the transmission risk  
50  
51 significantly. The relationships between the timing and the change rates of daily confirmed-cases were  
52  
53 analyzed with a time-series. Marschner et al. (29) used Australia data to back-project that there was a  
54  
55 fivefold increase in total infections if social distancing measures were delayed by one week.  
56  
57 Consistently, in Du's study (26), a 1-day delay in implementing the 1st intervention was expected to  
58  
59  
60

1  
2  
3 prolong an outbreak by 2.41 days. However, earlier lockdown, simulated by Islam et al. (11), showed  
4 a larger reduction in COVID-19 incidence compared with a delayed one after other social distancing  
5 interventions were initiated. Thanks to another empirical study based on the Oxford COVID-19  
6 Government Response Tracker (30), some ideas can be grasped when deciding how to implement a  
7 measure earlier. It tracked  $R_t$  temporally for two weeks following the 100th reported case in 140  
8 countries and observed the median timing among them, finding that lockdown measures and travel  
9 bans were considered early if they were implemented around two weeks before the 100<sup>th</sup> case and a  
10 week before detecting the first case respectively (30).  
11  
12  
13  
14  
15  
16  
17  
18  
19  
20  
21  
22  
23  
24

25 In addition, social distancing measures had a progressive control impact on the growth rates of daily  
26 confirmed cases, with Courtemanche et al. (31) showing reductions of 5.4%, 6.8%, 8.2% and 9.1%  
27 after 1-5 days, 6-10 days, 11-15 days, 16-20 days, respectively following the roll-out of the measures.  
28 The timing effect was further illustrated by Thu et al. (32) that social distancing interventions took 1-  
29 4 weeks to have an effect on the decline in number of infected cases among the 10-studied countries.  
30 For those countries with higher growth rates at the beginning may have more difficulties in controlling  
31 the transmission, and vice versa for those countries with initial lower growth rates. For example, China,  
32 Iran and Turkey, promulgating the most stringent level of social distancing measures, with initial  
33 infection growth rates apparently lower at around 60-70%, had the highest decline rates at 71%, 51.8%  
34 and 50.8% respectively while the U.S. and the U.K., having the highest initial growth rates (99.9%),  
35 experienced significantly lower decline rates of 14.8% and 25.9% respectively. The result suggested  
36 that social distancing measures could be more effective when being introduced earlier under situations  
37 with low growth rates.  
38  
39  
40  
41  
42  
43  
44  
45  
46  
47  
48  
49  
50  
51  
52  
53  
54  
55  
56  
57  
58  
59  
60



## Discussion

This scoping review covered a broad range of social distancing interventions and outcome indicators. A comparison of the major outcomes of different levels of measures is shown in Table 3. Outcomes were mainly indicated by changes in  $R_t$ , incidence and mortality, along with indirect indicators such as daily contact frequency and travel distance. There was adequate empirical evidence for the effect of social distancing at individual level. The evidence was also adequate for partial or full lockdown at community level. However, the evidence was inconsistent for school closure and public transport restriction as a single type of intervention. The evidence was also very limited for workplace/business closures.

(Insert Table 3 here)

Many studies showed the combined effects of different social distancing interventions which were usually implemented as a package with 3-5 measures. Observed impact by an individual measure was scarcely reported or only demonstrated with modelling. For example, Islam et al. (11) reported that among 149 countries being studied, 118 countries covered 5 measures while 29 countries used 3 to 4 interventions, with only 1 country introducing 2 measures and the remaining 1 country using a single measure. In addition, even though the lockdown, in this review, was shown with the highest reduction in  $R_t$ , it had indeed been used along with multiple measures.

Apart from types of interventions, relationship between implementation time points and effect were investigated. Lam et al. (33); observed an early public health measure promulgation was able to contain the epidemic in Hong Kong, without initiating extreme measures such as a city-wide lockdown. Other studies suggested that the effect time variation might be due to the different times and levels of promulgating the social distancing measures, making the effectiveness apparently different (32). It

1  
2  
3 could be demonstrated through the comparison between countries showing that the stronger the level  
4 of social distancing, the faster it took to reduce the number of daily confirmed cases (32). Furthermore,  
5 high initial infection incidence due to late implementation of measures would reduce the effectiveness  
6 of measures (32). All these results indicated a need of rapid response and stringent measures to win  
7 the battle.  
8  
9  
10  
11  
12  
13  
14  
15  
16

17 The effectiveness of social distancing measures was also affected by the contextual factors such as  
18 compliance, social belief and cultural factors. In addition, the personal behaviors such as wearing  
19 masks and improving personal hygiene as well as implementing border control also played a key role.  
20  
21  
22  
23  
24  
25  
26

### 27 **Contextual factors**

28  
29  
30 Although social distancing measures impacted the pandemic curve, there are also other factors such as  
31 contextual factors including compliance, social belief and cultural factors contributing to its  
32 effectiveness. Low public compliance may be a key explanation that interventions showed no sign of  
33 flattening its curve. The compliance issue was further supported by Cruz's study (34) examining that  
34 the social distancing index (SDI), a social distancing adoption index used by the Brazilian government,  
35 larger than 55% was needed to reduce the daily death number. Moreover, social belief such as  
36 awareness of disease information might cultivate a sense of self-imposed initiation of handwashing,  
37 wearing protectives, purposely keeping a distance from people and reducing outdoor activities.  
38  
39 Cultural factors may also have the influence on public gatherings, although it was too complicated for  
40 a quantitative evaluation regarding various timings, magnitudes and processes that have been  
41 happening in a region. Cultural factors were firstly studied in Huynh's study (35) illustrating that  
42 countries with higher Uncertainty Avoidance Index (UAI) predicted a smaller proportion of people  
43 gathering in public such as grocery and retail stores, pharmacy stores, recreation areas, public transport  
44  
45  
46  
47  
48  
49  
50  
51  
52  
53  
54  
55  
56  
57  
58  
59  
60

1  
2  
3 and workplaces whereas countries in the northern European such as Finland, Sweden, and Norway  
4  
5 with lower uncertainty avoidance indices were unlikely to follow with social distancing measures.  
6  
7 Further, Islam's study (11) observed greater case reduction associated with those countries with a  
8  
9 higher GDP per capita, a higher proportion of population aged 65 years or above, and stronger  
10  
11 preparedness for the pandemic in terms of country health security index. Therefore, the cultural  
12  
13 determinants are likely to play an important role in controlling infection behaviour.  
14  
15  
16  
17  
18  
19

### 20 **Personal behaviour and border control**

21  
22  
23 There are other measures that might be useful to suppress the virus spread, such as changes of personal  
24  
25 behaviours including wearing face masks and improving personal hygiene. Border control is also one  
26  
27 of the main interventions being used to contain the pandemic. These measures might have confounding  
28  
29 effects to that of social distancing. A linear regression model by Zhang R et al. (36) showed a daily  
30  
31 new infection in New York decreasing with a slope of 106 cases per day, with a decreasing rate equal  
32  
33 to around 3% of daily new infections, after the mask-on policy. In contrast, the U.S. (excluding New  
34  
35 York) increased with a slope of 70 cases per day, corresponding to an increasing rate at around 0.3%  
36  
37 of daily new infections, as no such policy was implemented. The authors argued that the sharp  
38  
39 difference between the growth rates of the daily new infections of New York and the U.S. (excluding  
40  
41 New York) confirmed the effectiveness of use of mask. In addition, their research also brought out the  
42  
43 mask-on policy in helping reduce the infection cases by over 75,000 from April 6 to May 9. Overall,  
44  
45 it was proposed that mandated face covering effectively prevented airborne transmission by blocking  
46  
47 atomization and inhalation of virus-bearing aerosols. Apart from using face coverings, hand hygiene  
48  
49 was also commonly used during the pandemic to reduce acute respiratory illness, increasing the odds  
50  
51 to 16% (35). Adherence to respiratory/hand hygiene measures were strongly recommended and its  
52  
53 effectiveness would probably increase in combination with other measures (12). Further, border  
54  
55  
56  
57  
58  
59  
60

1  
2  
3 control is also a measure widely used by many countries to block the importation from cases. Lai et  
4 al. (37) observed a reduction of median Rt from 1 to 0.75 after successive implementations of border  
5 control measures within 5 weeks by closing air-based and land-based borders and finally introducing  
6 mandatory quarantine to travellers from China, showing the importance of border control in limiting  
7 the infection.  
8  
9  
10  
11  
12  
13  
14  
15  
16

### 17 **Knowledge gap for future research**

18  
19 Due to the heterogeneity of the outcomes adopted in the studies, it is difficult to render direct  
20 comparison of the changes in Rt and incidence. Consistent inclusion of these outcomes in studies of  
21 similar kinds may allow systematic review and meta-analysis in further studies.  
22  
23  
24  
25  
26  
27  
28

29 Few studies have investigated the effect of closure of entertainment and eatery settings. The SAGE  
30 report (21) suggested that the closure of gyms, bars and restaurants were useful since the environmental  
31 risks linked to higher probability of touch surfaces, higher aerosol generation and breathing rates due  
32 to aerobic activities. Specifically, the risk in bars and pubs was likely to be higher than many other  
33 indoor settings due to close proximity of people, long exposure duration, no wearing of face coverings  
34 and talking loudly. Some venues were poorly ventilated, especially in winter. In addition, consumption  
35 of alcohol impacts on customers' behaviors. More empirical evidence focusing on the dynamic among  
36 the environment, customer behaviors and transmission risks would be beneficial.  
37  
38  
39  
40  
41  
42  
43  
44  
45  
46  
47  
48  
49

50 Some researchers proposed strategies to be proven by empirical evidence. A circuit breaker, proposed  
51 in the SAGE report (21), referring to 2-3 week short-time lockdown, could put the epidemic curve  
52 back by about 28 days or more. Based on historical evidence from the 1918 flu pandemic, Correia et  
53 al. (38) argued that regions taking earlier and aggressive social distancing measures grew faster  
54 economically in the post-pandemic period although there were adverse effects on the economy during  
55  
56  
57  
58  
59  
60

1  
2  
3 the pandemic period. Thus, predicting the recovery in an economy or a community based on the  
4 effectiveness of each intervention would be a matter of continuing concern.  
5  
6  
7  
8  
9

10 Fatigue of pandemic prevention was seen everywhere during the course of COVID-19 pandemic which  
11 may exacerbate the peaks and resurgence following the relaxation of self-imposed measures and  
12 undermine the public acceptance to the advice from authorities. Governments with good risk  
13 communication with the public, hinging on engagement, communication and feedback, would be  
14 essential to help individuals assess and reduce their own risks appropriately. Abel et al. (39) reported  
15 that social distancing might lead to depression and anxiety in some people, which in return have an  
16 impact on social stability. Psychological impacts were not only observed on patients, health care  
17 workers but also on the overall population. However, Kim et al. (40) suggested we should routinely  
18 provide psychological support instead of stopping social distancing measures. Future studies should  
19 explore the long term strategies for risk communication and risk analysis in specific settings to  
20 overcome public fatigue towards social distancing. Response measures should be proportional to the  
21 risk in different settings.  
22  
23  
24  
25  
26  
27  
28  
29  
30  
31  
32  
33  
34  
35  
36  
37  
38  
39  
40

## 41 **Limitations**

42  
43 Although a lot of information about the measures taken was collected in government websites,  
44 measures being used in small localities or regional areas were not widely publicized or difficult to  
45 access, resulting in relevant studies being very limited. Moreover, there was a wide variation of testing  
46 accessibility and the criteria for who should be tested in different countries. Similarly, the points of  
47 time of promulgation and severity level of interventions are different among countries. Therefore, the  
48 cumulative confirmed cases might not reflect the actual situation of population and were not accurate  
49 for comparisons. Using a time series analysis referencing to the date of death but not to the date of  
50 testing done will be under a possible variation of case reporting and might hinder the decision making  
51  
52  
53  
54  
55  
56  
57  
58  
59  
60

1  
2  
3 process as long as 15-days delay in some countries. Another concern is that some studies used mobile  
4 device for people attendance changes in specific times and locations. The drawback was the unknown  
5 characteristics of those persons using mobile devices such as age and gender etc. The data only tracked  
6 mobile devices but not persons, who might have multiple devices (e.g., a phone and a tablet), or might  
7 not take their devices when they leave home. Hence, the results might not reflect the actual mobility  
8 patterns. Finally, our review excluded non-English literature. The English literature of COVID-19  
9 might be biased towards countries with good research capacity and interests in publishing their  
10 findings for international audience.  
11  
12  
13  
14  
15  
16  
17  
18  
19  
20  
21  
22  
23  
24

## 25 **Conclusions**

26  
27 Our review showed that the outcomes of social distancing measures were mainly measured by changes  
28 in  $R_t$ , incidence and mortality. There was empirical evidence for the effect of social distancing between  
29 individuals, and for partial or full lockdown. However, the evidence was inconsistent for the separate  
30 effect of school closure and public transport restriction, and it was very limited for workplace/business  
31 closures. In the community setting, there was more evidence on the combined effect of different social  
32 distancing interventions than for a single one. Apart from the effectiveness of the interventions, public  
33 compliance is another important issue. COVID-19 has been changing our lives and a new norm may  
34 emerge as we have to live with new variants of the virus, which may develop to a situation similar to  
35 that of the seasonal flu, where a total elimination is not the goal. Fatigue of preventive behaviors is on  
36 the top of the public health agenda. Community compliance with social distancing measures is related  
37 to the population's attitude to government policies, the access/awareness of trustful sources of  
38 information, the initiations and maintenance to self-imposed measures. Therefore, risk communication  
39 and risk analysis continue to be the cornerstone of public health measures and need to be in conjunction  
40 with addressing the research gap for implementing effective measures which are targeted and  
41 proportionate to the risk in different settings.  
42  
43  
44  
45  
46  
47  
48  
49  
50  
51  
52  
53  
54  
55  
56  
57  
58  
59  
60

**Figure:**

Figure 1. PRISMA flow diagram of literature search and selection

**Contributors**

EKY designed the study, applied for the grant and made major contributions to writing the manuscript. VCHC, EKY, KSS and CTH managed the review methodology. TSML, KSS and YSL conducted the review and data synthesis. TSML, KSS, EKY, CHKY and CTH wrote the first draft of the manuscript. All authors read, revised and approved the final manuscript.

**Funding**

This study was funded by Commissioned Research on the Novel Coronavirus Disease (Ref.: COVID190105) of the Health and Medical Research Fund, Food and Health Bureau, Hong Kong SAR Government. The funder had no role in the study design, collection, analysis, and interpretation of data, or in writing the manuscript.

**Competing interests**

The authors declare that they have no competing interests.

**Ethics approval**

Ethical approval was obtained from the Survey and Behavioural Research Ethics Committee of the Chinese University of Hong Kong (Ref no. SBRE-19-595).

**Consent for publication**

Not applicable.

**Data sharing statement**

The datasets used and/or analyzed during the current study are available from the corresponding author on reasonable request.

**Table 1 Article characteristics (n=34)**

|                                               |                         | Count (%) |
|-----------------------------------------------|-------------------------|-----------|
| <b>Countries/ cities by geographic region</b> |                         |           |
|                                               | Asia                    | 12 (30.0) |
|                                               | Australia & New Zealand | 1 (2.5)   |
|                                               | Europe                  | 9 (22.5)  |
|                                               | North America           | 12 (30.0) |
|                                               | South America           | 3 (7.5)   |
|                                               | Global studies          | 3 (7.5)   |
| <b>Country economy<sup>#</sup></b>            |                         |           |
|                                               | High income             | 26 (59.1) |
|                                               | Middle income           | 15 (34.1) |
|                                               | Low income              | 3 (6.8)   |
| <b>Article type</b>                           |                         |           |
|                                               | Research article        | 31 (91.2) |
|                                               | Review article          | 3 (8.8)   |

<sup>#</sup>Country economy level according to The World Bank's classification.



Table 2 Effectiveness and outcomes of social distancing measures

| Article and Study Characteristics                                   |                                   | Type of Social Distancing Measures    |                                                    |                                                                                              |                              |                                             |        | Effectiveness Indicators                                                                                                                                                                                                                                                                                                                                                                                                                               |
|---------------------------------------------------------------------|-----------------------------------|---------------------------------------|----------------------------------------------------|----------------------------------------------------------------------------------------------|------------------------------|---------------------------------------------|--------|--------------------------------------------------------------------------------------------------------------------------------------------------------------------------------------------------------------------------------------------------------------------------------------------------------------------------------------------------------------------------------------------------------------------------------------------------------|
| Authors; article type; study period/ publication date               | Country/ region; economy level    | Social distancing between individuals | School measure / closure                           | Workplace measure / closure                                                                  | Public transport restriction | Stay-at-home recommendation / ordinances    | Others | <b>Infectivity:</b> Rt, effective reduction number<br><b>Incidence:</b> incidence, incidence rate, attack rate, bed occupancy rate<br><b>Mortality:</b> Mortality or fatality rate<br><b>Effect time:</b> Action and effect duration, time of reaching peak<br><b>Attendance:</b> Attendance % of location, daily vehicles miles, daily contact frequency, mobility of leaving home, travel distance                                                   |
| Auger et al.(23) Research Article; 9/3/2020-7/5/2020                | The US; High                      |                                       | Statewide closure of primary and secondary schools |                                                                                              |                              |                                             |        | <b>(Incidence &amp; mortality):</b> Primary and secondary school closure in the US between March and May 2020 was associated with decreased COVID-19 incidence (adjusted relative change per week, -62%) and mortality (-58%). States that closed schools earlier, when cumulative incidence of COVID-19 was low, had the largest relative reduction in incidence and mortality, although there might be confounding effects from other interventions. |
| Brauner et al. (18). Research Article; 22/1/2020-30/5/2020          | Members of the EU countries; High | Limiting size of gathering            |                                                    | Closing most of non-essential businesses and high risk businesses, e.g. bars and restaurants |                              |                                             |        | <b>(Infectivity):</b> 41 countries-pooled data showed Rt reduction of 36% when gatherings were limited to 10 people or below; 28% when 100 or below and 13% when 1,000 or below. A 29% Rt reduction came with closing most of non-essential businesses while 20% was found when closing high risk businesses, e.g. bars and restaurants.                                                                                                               |
| Castaneda-Babarro et al. (41); Research article; 23/3/2020-1/4/2020 | Spain; High                       | ✓                                     | Forced e-learning                                  |                                                                                              | Restricted travel            | Country lockdown with stay-at-home measures |        | <b>(Attendance):</b> Self-reported walking time decreased by 58.2% during confinement.                                                                                                                                                                                                                                                                                                                                                                 |
| Clipman et al. (20); Research article; 17-28/6/2020                 | Maryland, the US; High            | ✓                                     |                                                    |                                                                                              |                              |                                             |        | <b>(Incidence):</b> Multivariable analysis found that history of SARS-CoV-2 infection was significantly less common among those who always practiced social distancing (aOR for indoor social distancing, 0.32 [95% CI, .10-                                                                                                                                                                                                                           |

| Article and Study Characteristics                          |                                | Type of Social Distancing Measures                                         |                          |                                                                  |                                                        |                                          |         | Effectiveness Indicators                                                                                                                                                                                                                                                                                                                                                                                                                                                       |
|------------------------------------------------------------|--------------------------------|----------------------------------------------------------------------------|--------------------------|------------------------------------------------------------------|--------------------------------------------------------|------------------------------------------|---------|--------------------------------------------------------------------------------------------------------------------------------------------------------------------------------------------------------------------------------------------------------------------------------------------------------------------------------------------------------------------------------------------------------------------------------------------------------------------------------|
| Authors; article type; study period/ publication date      | Country/ region; economy level | Social distancing between individuals                                      | School measure / closure | Workplace measure / closure                                      | Public transport restriction                           | Stay-at-home recommendation / ordinances | Others  | <p><b>Infectivity:</b> <math>R_t</math>, effective reduction number</p> <p><b>Incidence:</b> incidence, incidence rate, attack rate, bed occupancy rate</p> <p><b>Mortality:</b> Mortality or fatality rate</p> <p><b>Effect time:</b> Action and effect duration, time of reaching peak</p> <p><b>Attendance:</b> Attendance % of location, daily vehicles miles, daily contact frequency, mobility of leaving home, travel distance</p>                                      |
|                                                            |                                |                                                                            |                          |                                                                  |                                                        |                                          |         | .99]; aOR for outdoor social distancing, 0.10 [95% CI, .03–.33].                                                                                                                                                                                                                                                                                                                                                                                                               |
| Cruz (34); Research article; 15/3 to 5/4/2020              | São Paulo City, Brazil; Middle | ✓                                                                          | Mandatory closure        | Work-from-home and mandatory closure of non-essential businesses |                                                        |                                          |         | <b>(Mortality):</b> Correlating daily death number with Social Distancing Index (SDI) was derived from government websites. SDI was between 52% and 56%, crossing the break-even point of death number (from 0.82 to -0.4). SDI larger than 55% is needed to reduce death number.                                                                                                                                                                                              |
| Courtemanche et al. (31) Research article; 1/3 – 27/4/2020 | The US; High                   | Ban on large social gathering with a limit of 50 people                    | Public school closure    | Closing entertainment businesses                                 |                                                        | Shelter-in-place order (last policy)     |         | <b>(Incidence):</b> Growth rate of daily confirmed cases reduced by 5.4% after 1-5 days, 6.8% after 6-10 days, 8.2% after 11-15 days, 9.1% after 16-20 days. The number of confirmed cases was 10 times greater without shelter-in-place order and 35 times greater without 4 types of social distancing measures.                                                                                                                                                             |
| Du et al.(26); Research article; 1/1 - 15/2/2020           | 58 cities of China; Middle     | Ban on public gathering                                                    | ✓                        | Closing shopping malls, restaurants and entertainment businesses | Suspension of intracity and intercity public transport | ✓                                        | Testing | <b>(Infectivity):</b> $R_t$ declined by an average of 54.3% (+/- 17.6%) during the containment period.<br><b>(Effect time):</b> The mean time until successful containment was 21 days after the 1st reported case and 8 days following the initiation of interventions. During the period of containment, the $R_t$ declined by an average of 54.3%. A delay of 1 day in implementing the 1st intervention is expected to prolong an outbreak by 2.41 days (95% CI 0.96–3.86) |
| Huynh (35); Research article; 16/2 - 29/3/2020             | 58 countries; Low to high      | Social distancing in:<br>1.retail and recreation<br>2.grocery and pharmacy |                          |                                                                  |                                                        |                                          |         | <b>(Attendance):</b> Attendance in percentage change of specific locations was reported. Countries with higher Uncertainty Avoidance Index (UAI) predicted lower proportion of people gathering in public such as retail and recreation, grocery and pharmacy, parks,                                                                                                                                                                                                          |

| Article and Study Characteristics                     |                                | Type of Social Distancing Measures                                    |                          |                                                                    |                              |                                          |                                  | Effectiveness Indicators                                                                                                                                                                                                                                                                                                                                                                                                                                                                                                                                                                                |
|-------------------------------------------------------|--------------------------------|-----------------------------------------------------------------------|--------------------------|--------------------------------------------------------------------|------------------------------|------------------------------------------|----------------------------------|---------------------------------------------------------------------------------------------------------------------------------------------------------------------------------------------------------------------------------------------------------------------------------------------------------------------------------------------------------------------------------------------------------------------------------------------------------------------------------------------------------------------------------------------------------------------------------------------------------|
| Authors; article type; study period/ publication date | Country/ region; economy level | Social distancing between individuals                                 | School measure / closure | Workplace measure / closure                                        | Public transport restriction | Stay-at-home recommendation / ordinances | Others                           | <b>Infectivity:</b> Rt, effective reduction number<br><b>Incidence:</b> incidence, incidence rate, attack rate, bed occupancy rate<br><b>Mortality:</b> Mortality or fatality rate<br><b>Effect time:</b> Action and effect duration, time of reaching peak<br><b>Attendance:</b> Attendance % of location, daily vehicles miles, daily contact frequency, mobility of leaving home, travel distance                                                                                                                                                                                                    |
|                                                       |                                | 3.parks<br>4. transit stations<br>5.workplaces<br>6.residential areas |                          |                                                                    |                              |                                          |                                  | transit stations, workplaces. Northern Europe (Finland, Sweden & Norway) with lower UAI was unlikely to commit to social distancing. The cultural determinants played an important role in controlling infection behaviour.                                                                                                                                                                                                                                                                                                                                                                             |
| Islam et al. (11); Research article; 1/1– 30/5/2020   | 149 countries; Low to High     | Restriction of mass gathering and public events                       | School closure           | Workplace closure                                                  | Public transport closure     | Movement Lockdown                        |                                  | <b>(Incidence):</b> Overall, with any intervention, there was 13% reduction in incidence. Data suggested similar effectiveness when school closures, workplace closures, and restrictions on mass gatherings were in place. Earlier lockdown was associated with a larger reduction compared with a delay after other interventions were in place. A combination of 4 measures including restrictions on mass gatherings, school closures, workplace closures, and lockdowns in 32 countries was associated with decreasing incidence of COVID-19 (pooled incident rate ratio, IRR 0.87, 0.84 to 0.91). |
| Jarvis et al.; (42) Research article; 24/3-27/3/2020  | The UK; High                   |                                                                       | School closure           | Limiting time at work, having work closed and/or not visiting work |                              |                                          | Quarantine and isolation isolate | <b>(Attendance):</b> A 74% reduction in the average daily number of contacts was observed per participant (from 10.8 to 2.8). It was expected to be sufficient to reduce R0 from 2.6 before the lockdown to 0.62 (95% confidence interval [CI] 0.37–0.89) after the lockdown, based on all types of contact and 0.37 (95% CI = 0.22–0.53) for physical contacts only.                                                                                                                                                                                                                                   |
| Juni et al.(43); Research article; 7– 13/3/2020       | 144 countries; Low to High     | Gathering of any size                                                 | ✓                        | Closing restaurants, bars, or non-grocery stores                   |                              |                                          |                                  | <b>(Incidence):</b> A rate ratio comparing the cumulative count of confirmed COVID-19 cases with that of previous week was reported. There was strong association of                                                                                                                                                                                                                                                                                                                                                                                                                                    |

| Article and Study Characteristics                     |                                                                                     | Type of Social Distancing Measures                                 |                          |                             |                                                                                                                             |                                          |                                                                                                   | Effectiveness Indicators                                                                                                                                                                                                                                                                                                                                                                                                                               |
|-------------------------------------------------------|-------------------------------------------------------------------------------------|--------------------------------------------------------------------|--------------------------|-----------------------------|-----------------------------------------------------------------------------------------------------------------------------|------------------------------------------|---------------------------------------------------------------------------------------------------|--------------------------------------------------------------------------------------------------------------------------------------------------------------------------------------------------------------------------------------------------------------------------------------------------------------------------------------------------------------------------------------------------------------------------------------------------------|
| Authors; article type; study period/ publication date | Country/ region; economy level                                                      | Social distancing between individuals                              | School measure / closure | Workplace measure / closure | Public transport restriction                                                                                                | Stay-at-home recommendation / ordinances | Others                                                                                            | <b>Infectivity:</b> Rt, effective reduction number<br><b>Incidence:</b> incidence, incidence rate, attack rate, bed occupancy rate<br><b>Mortality:</b> Mortality or fatality rate<br><b>Effect time:</b> Action and effect duration, time of reaching peak<br><b>Attendance:</b> Attendance % of location, daily vehicles miles, daily contact frequency, mobility of leaving home, travel distance                                                   |
|                                                       |                                                                                     |                                                                    |                          |                             |                                                                                                                             |                                          |                                                                                                   | epidemic growth with mass gathering (RRR 0.65, 95% CI 0.53-0.79), school closure (RRR 0.63, 95% CI 0.57-0.78), business closure (RRR 0.62, 95% CI 0.45-0.85).                                                                                                                                                                                                                                                                                          |
| Khanna et al.(44); Review; Published on 10 April 2020 | China, HK, Singapore, South Korea, US, Italy, Spain, Iran and India; Middle to High |                                                                    |                          |                             | All transports in and out of Hubei were prohibited, with each citizen being allowed to go out for 30 minutes every two days | 3-week lockdown in Hubei                 | Quarantine of mild and asymptomatic cases for China Travelers                                     | <b>(Infectivity):</b> China Rt reduced from 2.35 to 1.05 during the period of 16/1/2020–30/1/2020.<br><b>(Effect time):</b> China slowed the dispersal of infection to other cities by 2.91 days and increased the doubling time from 2 to 4 days. Other Chinese cities implementing preventive control measures earlier were reported 33.3% fewer cases in the first week of their outbreaks compared with that of cities starting the control later. |
| Koh, et al. (30); Research report; 1/1/2020-28/5/2020 | 142 countries; Low to High                                                          | Cancellation of public events, restrictions on size of gatherings, | ✓                        | Closure of workplace        | Closures of public transport                                                                                                | Stay-at-home order                       | Restrictions on internal movements/ international travel                                          | <b>(Infectivity):</b> Following the 100 <sup>th</sup> case, it was found effective that complete travel bans and all forms of lockdown-type measures reduced average Rt over the 14 days. Stay-at-home recommendation and partial lockdowns were as effective as complete lockdowns when controlling the outbreaks. However, these measures were effective when it could be implemented early.                                                         |
| Lai et al. (37); Research article; 23/1 – 1/3/2020    | Hong Kong; High                                                                     |                                                                    | ✓                        | Work from home              |                                                                                                                             |                                          | Border Control<br>• Phases 1-3: (18/1-7/2)<br>• Phase 4: (8-29/2)<br><br>Mandatory quarantine for | <b>(Infectivity):</b> Median Rt dropped from 1.07 to 0.75 with border control in phase 4 (8–29/2/2020).                                                                                                                                                                                                                                                                                                                                                |

| Article and Study Characteristics                     |                                                                                       | Type of Social Distancing Measures    |                                   |                                                   |                                                                  |                                          |                                                                               | Effectiveness Indicators                                                                                                                                                                                                                                                                                                                                                                                                                                                                                                                                                                                                                      |
|-------------------------------------------------------|---------------------------------------------------------------------------------------|---------------------------------------|-----------------------------------|---------------------------------------------------|------------------------------------------------------------------|------------------------------------------|-------------------------------------------------------------------------------|-----------------------------------------------------------------------------------------------------------------------------------------------------------------------------------------------------------------------------------------------------------------------------------------------------------------------------------------------------------------------------------------------------------------------------------------------------------------------------------------------------------------------------------------------------------------------------------------------------------------------------------------------|
| Authors; article type; study period/ publication date | Country/ region; economy level                                                        | Social distancing between individuals | School measure / closure          | Workplace measure / closure                       | Public transport restriction                                     | Stay-at-home recommendation / ordinances | Others                                                                        | <b>Infectivity:</b> Rt, effective reduction number<br><b>Incidence:</b> incidence, incidence rate, attack rate, bed occupancy rate<br><b>Mortality:</b> Mortality or fatality rate<br><b>Effect time:</b> Action and effect duration, time of reaching peak<br><b>Attendance:</b> Attendance % of location, daily vehicles miles, daily contact frequency, mobility of leaving home, travel distance                                                                                                                                                                                                                                          |
|                                                       |                                                                                       |                                       |                                   |                                                   |                                                                  |                                          | China travelers in phase 4                                                    |                                                                                                                                                                                                                                                                                                                                                                                                                                                                                                                                                                                                                                               |
| Lam et al.(33); Research article; 1/1 – 31/5/2020     | Hong Kong; High                                                                       | Cancellation of large scale events    | School suspension from phases 1-4 | Work from home for civil servants in phases 1 & 2 |                                                                  |                                          | Entry restriction / quarantine for inbound travelers and asymptomatic testing | <b>(Mortality):</b> Case fatality ratio (0.4%) was much lower than global ones during the same period in WHO (6.1%).                                                                                                                                                                                                                                                                                                                                                                                                                                                                                                                          |
| Lasry et al.(45); Research article; 26/2 – 1/4/2020   | 4 US metropolitan areas: San Francisco, Seattle; New Orleans, and New York City; High | Ban on gathering of certain size      | School closure                    | Restrictions on businesses                        |                                                                  | Stay-at-home orders (last policy)        | States of Emergency (1 <sup>st</sup> policy)                                  | <b>(Attendance):</b> Mobility of leaving home was reported. In four localities, the percentage leaving home was close to 80% on February 26, and decreased to 42% in New York City, 47% in San Francisco, 52% in Seattle, and 61% in New Orleans on April 1. Mobility did not decline following the state of emergency alone but a combination of policies such as gathering restrictions or school closures and further decreased after stay-at-home orders.<br><br><b>(Incidence):</b> 3-day average percentage change in cumulative case count showed a decreasing trend by the last 2 weeks of March after a set of policies implemented. |
| Lino et al. (5); Research article; 1-31/5/2020        | Fortaleza (state capital city), Ceará, Brazil; Middle                                 | ✓                                     |                                   | Suspension of commercial activities               | Restricted daytime movements and interruption of intercity trips | City lockdown, night curfews             |                                                                               | <b>(Incidence)</b> Bed occupancy rates in a tertiary hospital for referred COVID-19 cases were higher than 100% before the lockdown and reached nearly 140% 2 days after. The rate decreased to below 100% 14 days after the lockdown (viral incubation period), and dropped to about 85% 23 days after the lockdown onset.                                                                                                                                                                                                                                                                                                                   |

| Article and Study Characteristics                     |                                | Type of Social Distancing Measures                     |                           |                                                                                  |                              |                                                |                                                                       | Effectiveness Indicators                                                                                                                                                                                                                                                                                                                                                                                                                     |
|-------------------------------------------------------|--------------------------------|--------------------------------------------------------|---------------------------|----------------------------------------------------------------------------------|------------------------------|------------------------------------------------|-----------------------------------------------------------------------|----------------------------------------------------------------------------------------------------------------------------------------------------------------------------------------------------------------------------------------------------------------------------------------------------------------------------------------------------------------------------------------------------------------------------------------------|
| Authors; article type; study period/ publication date | Country/ region; economy level | Social distancing between individuals                  | School measure / closure  | Workplace measure / closure                                                      | Public transport restriction | Stay-at-home recommendation / ordinances       | Others                                                                | <b>Infectivity:</b> Rt, effective reduction number<br><b>Incidence:</b> incidence, incidence rate, attack rate, bed occupancy rate<br><b>Mortality:</b> Mortality or fatality rate<br><b>Effect time:</b> Action and effect duration, time of reaching peak<br><b>Attendance:</b> Attendance % of location, daily vehicles miles, daily contact frequency, mobility of leaving home, travel distance                                         |
| Marschner (29); Research article; 25/1 – 8/5/2020     | Australia; High                | Stage 2: limiting gathering of 2 people (26-31 March)  |                           | Stage 1: prohibited face-to-face meeting and entertainment activities (23 March) |                              | Stage 3: prohibited leaving home (26-31 March) | Border control (20 March)                                             | <b>(Effect time):</b> It was estimated that one week delay in control measures would lead to an almost fivefold increase in total infections but one week earlier control would reduce total infections of similar magnitude.                                                                                                                                                                                                                |
| Munayco et al.(46); Research article; 23/1– 9/5/2020  | Peru; Middle                   | Ban on gathering of larger than 300 people on 12 March | School measure since 11/3 |                                                                                  |                              |                                                | Closing country border, National Emergency Declaration on 16 March    | <b>(Incidence):</b> Before the implementation of social distancing measures in Lima, the mean scaling of growth parameter, p, was estimated at 0.9 and the reproduction number at 2.3. School closures and other social distancing interventions slowed down the spread of the novel coronavirus, shifting the exponential growth trend to an approximately linear growth trend, with the scaling of growth parameter being reduced to 0.53. |
| Pan et al.(28); Research article; 8/12/2019– 8/3/2020 | China Wuhan; Middle            | Social distancing                                      |                           |                                                                                  | Traffic restriction          | Cordons sanitaire                              | Universal symptom survey, home and centralized quarantine             | <b>(Infectivity):</b> A reduction of Rt from larger than 3 in January to less than 1.0 on February 6 and then less than 0.3 in March after implementation of measures by different phases.                                                                                                                                                                                                                                                   |
| Patel P et al.(47); Research article; 30/1– 4/5/2020  | India; Middle                  | ✓                                                      | ✓                         | ✓                                                                                |                              | Lockdown since 25 March                        | progressive travel restriction, health promotion and enhanced testing | <b>(infectivity):</b> A decline in Rt following NPIs implementation was observed, with a reduction from 2.51 to 1.83 at the end of lockdown phase. Although the sub-exponential growth confirmed mitigation of epidemic, Rt larger than 1 still indicated ongoing disease transmission.                                                                                                                                                      |
| Rivkees et al. (22); Brief report;                    | Florida, US High               | ✓                                                      | Closures of elementary    | Restricted access to bars and                                                    | ✓                            | Statewide stay-at-home order                   |                                                                       | <b>(Attendance)</b> Assessment of movement within the state using Google mobility and Unacast mobility analytics based on cell                                                                                                                                                                                                                                                                                                               |



| Article and Study Characteristics                          |                                | Type of Social Distancing Measures                                      |                                                               |                                                                    |                                                                |                                          |                                  | Effectiveness Indicators                                                                                                                                                                                                                                                                                                                                                                                                                                                       |
|------------------------------------------------------------|--------------------------------|-------------------------------------------------------------------------|---------------------------------------------------------------|--------------------------------------------------------------------|----------------------------------------------------------------|------------------------------------------|----------------------------------|--------------------------------------------------------------------------------------------------------------------------------------------------------------------------------------------------------------------------------------------------------------------------------------------------------------------------------------------------------------------------------------------------------------------------------------------------------------------------------|
| Authors; article type; study period/ publication date      | Country/ region; economy level | Social distancing between individuals                                   | School measure / closure                                      | Workplace measure / closure                                        | Public transport restriction                                   | Stay-at-home recommendation / ordinances | Others                           | <b>Infectivity:</b> Rt, effective reduction number<br><b>Incidence:</b> incidence, incidence rate, attack rate, bed occupancy rate<br><b>Mortality:</b> Mortality or fatality rate<br><b>Effect time:</b> Action and effect duration, time of reaching peak<br><b>Attendance:</b> Attendance % of location, daily vehicles miles, daily contact frequency, mobility of leaving home, travel distance                                                                           |
| 1/3/2020-31/5/2020                                         |                                |                                                                         | schools, high schools, and universities for in-person classes | restaurants, limited commerce to essential businesses              |                                                                |                                          |                                  | phone data showed that closing schools resulted in a 40-55% reduction in average distance traveled compared with pre-outbreak levels. The stay-at-home order was associated with a further reduction in average distance traveled. During the period under stay-at-home order, the density of in-person encounters fell by 74-82%, visits to nonessential venues by 55%, and overall distance traveled by 45%. Average distance traveled within the state decreased by 25-40%. |
| Saez et al. (48) Research report; 17/1/2020-5/4/2020       | Spain High                     | Reducing travel, avoiding crowded places, using non-contact greetings   | ✓                                                             | Closure of workplaces, stadiums, cinemas, theatres and restaurants |                                                                | ✓                                        | Quarantines, travel restrictions | After implementing the measures for one day, the variation rate of accumulated cases decreased daily by 3.059 percentage points on average (95% credibility interval: -5.371, -0.879) and the decline was greater when time passed and reached 5.11 percentage points on the last day of data collection. Despite not entering the decrease phase, the measures taken by the Spanish Government on March 14, 2020 managed to flatten the curve.                                |
| Siedner et al. (24); Research article; 10/3/2020-26/5/2020 | All 50 states of the US, High  | Statewide social distancing measures with cancellation of public events | ✓                                                             | ✓                                                                  | Restrictions on internal movement and closure of state borders |                                          |                                  | <b>(Incidence)</b> The mean daily COVID-19 case growth rate dropped by 0.9% per day, starting 4 days after implementation of the first statewide social distancing measures.<br><b>(Mortality)</b> After implementing social distancing for 7 days, the COVID-19-attributed mortality growth rate fell by 2.0% per day, although this decline was no longer statistically significant by 10 days.                                                                              |

| Article and Study Characteristics                       |                                                                                                         | Type of Social Distancing Measures      |                          |                                                      |                                     |                                                   |                                                        | Effectiveness Indicators                                                                                                                                                                                                                                                                                                                                                                                                    |
|---------------------------------------------------------|---------------------------------------------------------------------------------------------------------|-----------------------------------------|--------------------------|------------------------------------------------------|-------------------------------------|---------------------------------------------------|--------------------------------------------------------|-----------------------------------------------------------------------------------------------------------------------------------------------------------------------------------------------------------------------------------------------------------------------------------------------------------------------------------------------------------------------------------------------------------------------------|
| Authors; article type; study period/ publication date   | Country/ region; economy level                                                                          | Social distancing between individuals   | School measure / closure | Workplace measure / closure                          | Public transport restriction        | Stay-at-home recommendation / ordinances          | Others                                                 | <p><b>Infectivity:</b> Rt, effective reduction number</p> <p><b>Incidence:</b> incidence, incidence rate, attack rate, bed occupancy rate</p> <p><b>Mortality:</b> Mortality or fatality rate</p> <p><b>Effect time:</b> Action and effect duration, time of reaching peak</p> <p><b>Attendance:</b> Attendance % of location, daily vehicles miles, daily contact frequency, mobility of leaving home, travel distance</p> |
| Thu et al.(32); Research article; 11/1 - 2/5/2020       | 10 countries: the US, Spain, Italy, UK, France, Germany, Russia, Turkey, Iran and China; Middle to High | Cancellation of public events           | ✓                        | Work from home, cancellation of non-essential events | Domestic transportation restriction | By region and, by nationwide, by different phases | Entry restrictions to those from highly infected areas | <b>(Incidence):</b> Growth rates of daily confirmed cases in the UK and the US were the most severe, at 99.9%, followed by Spain at 99.2%, France at 96.2%, Italy at 95.4%, Germany at 85%, Russia at 72.2%, Turkey at 70.7% and Iran at 62.8%. Countries with high growth rate showed lower decline rate, showing longer time needed for those countries to control the epidemic by social distancing measures.            |
| Vokó et al.(49); Research article; 1/2/2020-18/4/2020   | 28 European countries; High                                                                             | Social distancing with public event ban | ✓                        | ✓                                                    | ✓                                   | ✓                                                 |                                                        | (Incidence) Incidence of new COVID-19 cases grew by 24% per day on average before the changepoint. From the changepoint observed, the growth rate was reduced to 0.9%, 0.3% increase, and to 0.7% and 1.7% decrease by increasing social distancing quartiles based on Social distance index (SDI) calculated based on Google Community Mobility Reports.                                                                   |
| Wan et al.(25); Research article; 20/1/2020-3/3/2020    | Mainland of China excluding Hubei; Middle                                                               | Social distancing and self-isolation    |                          |                                                      | ✓                                   |                                                   | Close contact tracing, body temperature measurement    | <b>(Infectivity)</b> Rt has dropped sharply from 3.34 on 20 January 2020 to 0.89 on 31 January 2020, after integrated control strategies were implemented.                                                                                                                                                                                                                                                                  |
| Weill et al. (19); Research article; 1/1/2020-21/4/2020 | The US; High                                                                                            | ✓                                       |                          | business closures                                    |                                     | Safer-at-home orders                              |                                                        | <b>(Attendance):</b> Median distance traveled, retail and recreation, locations visited by a mobile device per day showed a sharp decrease in March after the implementation of social distancing measures, with the wealthier areas decreasing mobility more significantly than poorer areas. However, the trend shifted reversely after March regarding completely staying at home. People from                           |



| Article and Study Characteristics                                                                  |                                                                                                              | Type of Social Distancing Measures    |                          |                             |                              |                                          |                          | Effectiveness Indicators                                                                                                                                                                                                                                                                                                                                                                                                    |
|----------------------------------------------------------------------------------------------------|--------------------------------------------------------------------------------------------------------------|---------------------------------------|--------------------------|-----------------------------|------------------------------|------------------------------------------|--------------------------|-----------------------------------------------------------------------------------------------------------------------------------------------------------------------------------------------------------------------------------------------------------------------------------------------------------------------------------------------------------------------------------------------------------------------------|
| Authors; article type; study period/ publication date                                              | Country/ region; economy level                                                                               | Social distancing between individuals | School measure / closure | Workplace measure / closure | Public transport restriction | Stay-at-home recommendation / ordinances | Others                   |                                                                                                                                                                                                                                                                                                                                                                                                                             |
|                                                                                                    |                                                                                                              |                                       |                          |                             |                              |                                          |                          | <p><b>Infectivity:</b> Rt, effective reduction number</p> <p><b>Incidence:</b> incidence, incidence rate, attack rate, bed occupancy rate</p> <p><b>Mortality:</b> Mortality or fatality rate</p> <p><b>Effect time:</b> Action and effect duration, time of reaching peak</p> <p><b>Attendance:</b> Attendance % of location, daily vehicles miles, daily contact frequency, mobility of leaving home, travel distance</p> |
|                                                                                                    |                                                                                                              |                                       |                          |                             |                              |                                          |                          | wealthier areas shifted from the lowest before March to the most likely to completely stay at home after March, vice versa for those in poorer countries.                                                                                                                                                                                                                                                                   |
| Wilasang et al.(50); Research article; From the date of 100 cases to 7/4/2020                      | 10 countries: Belgium, China, France, Germany, Iran, South Korea, Spain, Thailand, US and UK; Middle to High | ✓                                     |                          |                             |                              | ✓                                        | Active case finding      | <b>(Infectivity):</b> After 3-week control measures, only China and South Korea were successful in controlling the disease ( $R_t < 1$ ), while the others were unsuccessful. The study observed that countries with active case finding and prompt isolation could have a reduction in the reproduction number more rapidly.                                                                                               |
| Yehya et al.(51); Research article; 21/1-29/42020                                                  | The US; High                                                                                                 |                                       | School closure           |                             |                              |                                          | Declaration of Emergency | <b>(Mortality):</b> Each day of delay of either intervention increased mortality risk by 5- 6%.                                                                                                                                                                                                                                                                                                                             |
| Zhang et al.(27); Research article; 24 – 30/12/2019 as baseline and 1-10/2/2020 as outbreak period | Wuhan and Shanghai; Middle                                                                                   |                                       | ✓                        |                             | ✓                            |                                          |                          | <b>(Attendance):</b> Daily contact frequency in Wuhan showed a reduction from 14.6 to 2.0 while Shanghai from 18.8 to 2.3. The trend was consistent with mobility data of an 86.9% and a 74.5% drop in Wuhan and Shanghai respectively.                                                                                                                                                                                     |
| Zhang et al. (36); Research article;                                                               | Wuhan (China), Italy and the US;                                                                             | ✓                                     |                          |                             |                              | Stay-at-home                             | Face mask                | <b>(Incidence):</b> Daily new infection in New York decreased with a slope of 106 cases per day (decreasing rate at around 3%) after face mask-on policy, while US (excluding New                                                                                                                                                                                                                                           |

| Article and Study Characteristics                     |                                | Type of Social Distancing Measures                                                                              |                          |                             |                                                          |                                          |        | Effectiveness Indicators                                                                                                                                                                                                                                                                                                                                                                                                                                          |
|-------------------------------------------------------|--------------------------------|-----------------------------------------------------------------------------------------------------------------|--------------------------|-----------------------------|----------------------------------------------------------|------------------------------------------|--------|-------------------------------------------------------------------------------------------------------------------------------------------------------------------------------------------------------------------------------------------------------------------------------------------------------------------------------------------------------------------------------------------------------------------------------------------------------------------|
| Authors; article type; study period/ publication date | Country/ region; economy level | Social distancing between individuals                                                                           | School measure / closure | Workplace measure / closure | Public transport restriction                             | Stay-at-home recommendation / ordinances | Others | <b>Infectivity:</b> Rt, effective reduction number<br><b>Incidence:</b> incidence, incidence rate, attack rate, bed occupancy rate<br><b>Mortality:</b> Mortality or fatality rate<br><b>Effect time:</b> Action and effect duration, time of reaching peak<br><b>Attendance:</b> Attendance % of location, daily vehicles miles, daily contact frequency, mobility of leaving home, travel distance                                                              |
| 23/1– 9/5/2020                                        | Middle to High                 |                                                                                                                 |                          |                             |                                                          |                                          |        | York) increased with a slope of 70 cases per day (increasing rate at around 0.3%). The decreasing rate in the daily new infections in New York with face covering mandate was proportionately higher than that in the United States with only social distancing and stay-at-home order, illustrating the importance of face covering on stemming the virus spread. With mask-on policy, Italy showed an infection reduction by over 75,000 from April 6 to May 9. |
| 58 <sup>th</sup> SAGE meeting summary (21); Review;   | The UK; High                   |                                                                                                                 |                          |                             |                                                          | Lockdown, short stay-at-home order       |        | <b>(Infectivity):</b> Lockdown was very impactful and reduced Rt from 2.7 to 0.6. 2-3 week short stay-at-home order had moderate impact on reducing Rt to less than 1. Both showed high confidence correlation.                                                                                                                                                                                                                                                   |
|                                                       |                                | Decreasing contact between households, closure of worship/ community centers, restriction on outdoor gatherings |                          |                             |                                                          |                                          |        | <b>(Infectivity):</b> Moderate impact was found by stopping contacts among different households, reducing Rt by around 0.1-0.2. Low to moderate impact was shown following closure of worship/ community centers, with a potential reduction in Rt up to 0.1. Low impact came with the restriction on outdoor gatherings, with Rt being reduced to less than 0.05, considering the frailty of SARS-CoV2 under well-ventilated environment.                        |
|                                                       |                                |                                                                                                                 |                          |                             | Local 5-mile travel restriction, use of public transport |                                          |        | <b>(Infectivity):</b> The impact of 5-mile travel restriction was considered as low to moderate, with limited benefit especially when local outbreak was widespread. Restricted use of public transport to key workers might have low impact due to low                                                                                                                                                                                                           |

| Article and Study Characteristics                     |                                | Type of Social Distancing Measures    |                                                                                                                                                                      |                                                                                                                                                                          |                              |                                          |        | Effectiveness Indicators                                                                                                                                                                                                                                                                                                                                                                                                                                                                                                                                                                                                                                  |
|-------------------------------------------------------|--------------------------------|---------------------------------------|----------------------------------------------------------------------------------------------------------------------------------------------------------------------|--------------------------------------------------------------------------------------------------------------------------------------------------------------------------|------------------------------|------------------------------------------|--------|-----------------------------------------------------------------------------------------------------------------------------------------------------------------------------------------------------------------------------------------------------------------------------------------------------------------------------------------------------------------------------------------------------------------------------------------------------------------------------------------------------------------------------------------------------------------------------------------------------------------------------------------------------------|
| Authors; article type; study period/ publication date | Country/ region; economy level | Social distancing between individuals | School measure / closure                                                                                                                                             | Workplace measure / closure                                                                                                                                              | Public transport restriction | Stay-at-home recommendation / ordinances | Others | <p><b>Infectivity:</b> Rt, effective reduction number</p> <p><b>Incidence:</b> incidence, incidence rate, attack rate, bed occupancy rate</p> <p><b>Mortality:</b> Mortality or fatality rate</p> <p><b>Effect time:</b> Action and effect duration, time of reaching peak</p> <p><b>Attendance:</b> Attendance % of location, daily vehicles miles, daily contact frequency, mobility of leaving home, travel distance</p>                                                                                                                                                                                                                               |
|                                                       |                                |                                       |                                                                                                                                                                      |                                                                                                                                                                          | restricted to key workers    |                                          |        | level of crowding, mandated face-mask policy and inconclusive evidence of the transmission risk in public transport.                                                                                                                                                                                                                                                                                                                                                                                                                                                                                                                                      |
|                                                       |                                |                                       | Mass / reactive school closure, closure of class with infection, alternative school schedules with half class sizes, closure of further/ high education or childcare |                                                                                                                                                                          |                              |                                          |        | <p><b>(Infectivity):</b> Moderate impact of closing all schools was found, with a reduction in Rt of 0.2~0.5 while closing secondary schools was considered to be more effective, with a Rt drop of 0.35.</p> <p>Reactive school closure might have a moderate impact on the reduction in Rt of 0.12 ~ 0.45 whereas low to moderate impact was estimated for reactive closure of class with infection.</p> <p>Alternative school schedules with reduced class size were suggested to have moderate to low impact. Closure of further / higher education associated with moderate impact while closure of childcare might have low to moderate impact.</p> |
|                                                       |                                |                                       |                                                                                                                                                                      | Work from home, alternate work, closure of bars/ pubs/ cafes/ restaurants, closure of gym/ leisure centers, non-essential retail, personal services, adherence to "COVID |                              |                                          |        | <p><b>(Infectivity):</b> Moderate impact of work from home was evaluated with a Rt reduction of 0.2-0.4 if all people followed while low to moderate impact with a Rt drop up to 0.1 was estimated for alternate work.</p> <p>Moderate impact with potential reduction in Rt of 0.1-0.2 was predicted for the closure of bars/pub/restaurants.</p> <p>Closure of gym/ leisure centres associated with low to moderate impact, with potential reduction in Rt of up to 0.1. Impact of closure of non-essential retail and personal services was estimated to be limited. Adherence to "COVID security" in workplaces such as</p>                           |

| Article and Study Characteristics                     |                                   | Type of Social Distancing Measures    |                          |                                                                                                           |                                                                                   |                                          |        | Effectiveness Indicators                                                                                                                                                                                                                                                                                        |
|-------------------------------------------------------|-----------------------------------|---------------------------------------|--------------------------|-----------------------------------------------------------------------------------------------------------|-----------------------------------------------------------------------------------|------------------------------------------|--------|-----------------------------------------------------------------------------------------------------------------------------------------------------------------------------------------------------------------------------------------------------------------------------------------------------------------|
| Authors; article type; study period/ publication date | Country/ region; economy level    | Social distancing between individuals | School measure / closure | Workplace measure / closure                                                                               | Public transport restriction                                                      | Stay-at-home recommendation / ordinances | Others |                                                                                                                                                                                                                                                                                                                 |
|                                                       |                                   |                                       |                          | security” arrangement in workplaces                                                                       |                                                                                   |                                          |        | improved hand/ surface hygiene and added barrier setting was also considered as low impact.                                                                                                                                                                                                                     |
| ECDC (12); Review; Published on 24 Sept 2020          | Members of the EU countries; High |                                       |                          |                                                                                                           |                                                                                   | Stay-at-home                             |        | <b>(Infectivity):</b> Rt reduced by 18% (ranging from 4-31%).                                                                                                                                                                                                                                                   |
|                                                       |                                   | Physical distance between 1-2m        |                          |                                                                                                           |                                                                                   |                                          |        | <b>(Infectivity):</b> Physical distancing of 1 metre or more was linked to an approximately five-fold reduction of the transmission risk, with the protective effect being doubled for every extra metre added.                                                                                                 |
|                                                       |                                   |                                       |                          |                                                                                                           | Domestic travel restrictions: a cordon sanitaire or public transportation closure |                                          |        | <b>(Infectivity):</b> There were contradictory results on Rt among the studies. Modelling showed strong association while other studies showed no impact unless other NPI was put in place, e.g. physical distancing. It was difficult to relate observed changes in transmission dynamics to a single measure. |
|                                                       |                                   |                                       | School closure           |                                                                                                           |                                                                                   |                                          |        | <b>(Incidence):</b> Observational data suggested that reopening schools has not been associated with significant increases in community transmission.                                                                                                                                                           |
|                                                       |                                   |                                       |                          | Work from home, flexible working time and social distancing measures, closure of non-essential businesses |                                                                                   |                                          |        | <b>(Infectivity):</b> There was a 40% Rt reduction by closing most of non-essential businesses while 31% by closing high risk businesses, e.g. restaurant/ bars/ nightclub/ cinemas/ gym.                                                                                                                       |

**Table 3 Comparison of the outcomes of different levels of social distancing**

|                                                                                                             | <b>Social distancing between individuals</b>                                                                                                                                                                                                                                                  | <b>School closure</b>                                                                                                                                                                                                                                                    | <b>Workplace measures</b>                                                                                                          | <b>Public transport restriction</b>                | <b>“Partial” lockdown</b>                                                                                                                                                 | <b>Full lockdown</b>                                                                                                                                                                                                                                                                                                                                                                               |
|-------------------------------------------------------------------------------------------------------------|-----------------------------------------------------------------------------------------------------------------------------------------------------------------------------------------------------------------------------------------------------------------------------------------------|--------------------------------------------------------------------------------------------------------------------------------------------------------------------------------------------------------------------------------------------------------------------------|------------------------------------------------------------------------------------------------------------------------------------|----------------------------------------------------|---------------------------------------------------------------------------------------------------------------------------------------------------------------------------|----------------------------------------------------------------------------------------------------------------------------------------------------------------------------------------------------------------------------------------------------------------------------------------------------------------------------------------------------------------------------------------------------|
| <b>Evidence amount</b>                                                                                      | Adequate                                                                                                                                                                                                                                                                                      | Moderate; inconsistent findings                                                                                                                                                                                                                                          | Limited                                                                                                                            | Limited                                            | Adequate                                                                                                                                                                  | Adequate                                                                                                                                                                                                                                                                                                                                                                                           |
| <b>(Infectivity):<br/>R<sub>t</sub>, effective reduction number</b>                                         | Physical distancing of 1 meter or more could reduce the transmission risk by 5 times and the protective impact was double for every extra meter (17).<br><br>Estimated R <sub>t</sub> reduced by 36%, 28% and 12% when gatherings were limited to 10, 100 and 1,000 people respectively (18). |                                                                                                                                                                                                                                                                          | Estimated 29% R <sub>t</sub> reduction by closing most of non-essential businesses while 20% by closing high risk businesses (18). | No difference in reduction in R <sub>t</sub> (11). | In Mainland China excluding Hubei (province of Wuhan), R <sub>t</sub> dropped from 3.34 to 0.89 (25).<br><br>In 58 cities of China, R <sub>t</sub> dropped by 54.3% (26). | From data of 41 countries, estimated R <sub>t</sub> reduced by 10% by stay-at-home orders (-2%–22%) (18).<br><br>UK estimation suggested that country lockdown could reduce R <sub>t</sub> from 2.7 to 0.6 while 2-3 week short stay-at-home order had moderate impact by reducing R <sub>t</sub> to below 1 (21).<br><br>China R <sub>t</sub> reduced from 2.35 to 1.05 during the lockdown (44). |
| <b>(Incidence):<br/>Infection incidence/ ratio of incidence rate ratio/ attack rate/ bed occupancy rate</b> | In the US, COVID-19 infection was less likely among the public who always practiced social distancing (aOR for indoor social distancing, 0.32 [95% CI, .10–.99]; aOR for outdoor social distancing, 0.10 [95% CI, .03–.33] (20).                                                              | In the US, school closure decreased COVID-19 incidence (adjusted relative change per week, -62%) (23).<br><br>Observational data from a number of the EU countries suggested that re-opening of schools was not associated with increase of community transmission (12). |                                                                                                                                    |                                                    | In the US, mean daily COVID-19 case growth rate decreased by 0.9% per day four days after lockdown (24).                                                                  | Data from 32 countries showed decreased incidence of COVID-19 (pooled incident rate ratio, IRR 0.87, 0.84 to 0.91) (11).<br><br>Growth rate of daily confirmed cases reduced by 5.4% after 1-5 days, 6.8% after 6-10 days, 8.2% after 11-15 days, 9.1% after 16-20 days (31).                                                                                                                      |

|                                                                                                                                                                                                                                                                                                                          |  |                                                                                                                           |  |  |                                                                                                                     |                                                                                                                                                                                                                                                                                                                                                                                               |
|--------------------------------------------------------------------------------------------------------------------------------------------------------------------------------------------------------------------------------------------------------------------------------------------------------------------------|--|---------------------------------------------------------------------------------------------------------------------------|--|--|---------------------------------------------------------------------------------------------------------------------|-----------------------------------------------------------------------------------------------------------------------------------------------------------------------------------------------------------------------------------------------------------------------------------------------------------------------------------------------------------------------------------------------|
| <p>1<br/>2<br/>3<br/>4</p> <p><b>(Mortality):<br/>Mortality/ Fatality<br/>rate</b></p>                                                                                                                                                                                                                                   |  | <p>In the US, school closure decreased COVID-19 related mortality (-58%) (23).</p>                                        |  |  | <p>In the US, COVID-19-attributed mortality growth rate decreased by 2% per day seven days after lockdown (24).</p> |                                                                                                                                                                                                                                                                                                                                                                                               |
| <p>5<br/>6<br/>7<br/>8</p> <p><b>(Effect time):<br/>Action and Effect<br/>duration / Time of<br/>Reaching peak</b></p>                                                                                                                                                                                                   |  |                                                                                                                           |  |  | <p>In 58 cities of China, mean time until successful containment was 8 days (26).</p>                               |                                                                                                                                                                                                                                                                                                                                                                                               |
| <p>9<br/>10<br/>11<br/>12<br/>13<br/>14<br/>15<br/>16<br/>17<br/>18<br/>19<br/>20<br/>21<br/>22<br/>23<br/>24<br/>25<br/>26<br/>27<br/>28</p> <p><b>(Attendance):<br/>Attendance % of<br/>location/ daily<br/>vehicles miles/<br/>daily contact<br/>frequency/ Mobility<br/>of leaving home/<br/>distance travel</b></p> |  | <p>In Florida, the US found that closing of schools resulted in a 40-55% reduction in average distance traveled (22).</p> |  |  | <p>In Spain, self-reported walking time decreased by 58.2% (41).</p>                                                | <p>In Wuhan and Shanghai, the average daily number of contacts dropped from 14.6 to 2 and 18.8 to 2.3 respectively during lockdown. Mobility dropped 86.9% and 74.5% in respective areas (27).</p> <p>Stay-at-home order in Florida of the US resulted in a reduction of in-person encounters by 74-82%, visits to nonessential venues by 55%, and overall distance traveled by 45% (22).</p> |

For peer review only

1  
2  
3  
4  
5  
6  
7  
8  
9  
10  
11  
12  
13  
14  
15  
16  
17  
18  
19  
20  
21  
22  
23  
24  
25  
26  
27  
28  
29  
30  
31  
32  
33  
34  
35  
36  
37  
38  
39  
40  
41  
42  
43  
44  
45  
46



## References

1. Kwok KO, Lai F, Wei WI, Wong SYS, Tang JWT. Herd immunity - estimating the level required to halt the COVID-19 epidemics in affected countries. *J Infect.* 2020;80(6):e32-e3.
2. WHO. Non-pharmaceutical public health measures for mitigating the risk and impact of epidemic and pandemic influenza. Geneva; 2019.
3. WHO. COVID-19: physical distancing 2020 [Available from: <https://www.who.int/westernpacific/emergencies/covid-19/information/physical-distancing>].
4. Chowdhury R, Luhar S, Khan N, Choudhury SR, Matin I, Franco OH. Long-term strategies to control COVID-19 in low and middle-income countries: an options overview of community-based, non-pharmacological interventions. *European Journal of Epidemiology.* 2020.
5. Lino DODC, Barreto R, Souza FDD, Lima CJMD, Silva Junior GBD. Impact of lockdown on bed occupancy rate in a referral hospital during the COVID-19 pandemic in northeast Brazil. *Brazilian Journal of Infectious Diseases.* 2020;24(5):466-9.
6. Pepin JL, Bruno RM, Yang RY, Vercamer V, Jouhaud P, Escourrou P, et al. Wearable Activity Trackers for Monitoring Adherence to Home Confinement During the COVID-19 Pandemic Worldwide: Data Aggregation and Analysis. *Journal of medical Internet research.* 2020;22(6):e19787.
7. Viner RM, Russell SJ, Croker H, Packer J, Ward J, Stansfield C, et al. School closure and management practices during coronavirus outbreaks including COVID-19: a rapid systematic review. *The Lancet Child and Adolescent Health.* 2020;4(5):397-404.
8. Chowdhury R, Heng K, Shawon MSR, Goh G, Okonofua D, Ochoa-Rosales C, et al. Dynamic interventions to control COVID-19 pandemic: a multivariate prediction modelling study comparing 16 worldwide countries. *European Journal of Epidemiology.* 2020;35(5):389-99.
9. Lai S, Ruktanonchai NW, Zhou L, Prosper O, Luo W, Floyd JR, et al. Effect of non-pharmaceutical interventions to contain COVID-19 in China. *Nature.* 2020.
10. Nussbaumer-Streit B, Mayr V, Dobrescu AI, Chapman A, Persad E, Klerings I, et al. Quarantine alone or in combination with other public health measures to control COVID-19: a rapid review. *The Cochrane database of systematic reviews.* 2020;4:CD013574.
11. Islam N, Sharp SJ, Chowell G, Shabnam S, Kawachi I, Lacey B, et al. Physical distancing interventions and incidence of coronavirus disease 2019: natural experiment in 149 countries. *BMJ.* 2020;370:m2743.
12. ECDC. Guidelines for non-pharmaceutical interventions to reduce the impact of COVID-19 in the EU/EEA and the UK. . Stockholm; 2020.
13. Meyer J, Pare G. Telepathology Impacts and Implementation Challenges: A Scoping Review. *Arch Pathol Lab Med.* 2015;139(12):1550-7.
14. Tricco AC, Zarin W, Rios P, Nincic V, Khan PA, Ghassemi M, et al. Engaging policy-makers, health system managers, and policy analysts in the knowledge synthesis process: a scoping review. *Implement Sci.* 2018;13(1):31.
15. Lockwood C, Tricco AC. Preparing scoping reviews for publication using methodological guides and reporting standards. *Nurs Health Sci.* 2020;22(1):1-4.
16. Tricco AC, Lillie E, Zarin W, O'Brien KK, Colquhoun H, Levac D, et al. PRISMA Extension for Scoping Reviews (PRISMA-ScR): Checklist and Explanation. *Ann Intern Med.* 2018;169(7):467-73.
17. Chu DK, Akl EA, Duda S, Solo K, Yaacoub S, Schünemann HJ. Physical distancing, face masks, and eye protection to prevent person-to-person transmission of SARS-CoV-2 and COVID-19: a systematic review and meta-analysis. *Lancet.* 2020;395(10242):1973-87.
18. Brauner JM, Mindermann S, Sharma M, Johnston D, Salvatier J, Gavenčiak T, et al. The effectiveness of eight nonpharmaceutical interventions against COVID-19 in 41 countries. *medRxiv.* 2020:2020.05.28.20116129.
19. Weill JA, Stigler M, Deschenes O, Springborn MR. Social distancing responses to COVID-19 emergency declarations strongly differentiated by income. *Proceedings of the National Academy of Sciences of the United States of America.* 2020;117(33):19658-60.
20. Clipman SJ, Wesolowski AP, Gibson DG, Agarwal S, Lambrou AS, Kirk GD, et al. Rapid real-time tracking of non-pharmaceutical interventions and their association with SARS-CoV-2 positivity: The

- COVID-19 Pandemic Pulse Study. *Clinical infectious diseases : an official publication of the Infectious Diseases Society of America*. 2020;02.
21. SAGE. The effectiveness and harms of non-pharmaceutical interventions. 2020 21 September 2020.
  22. Rivkees SA, Roberson S. The Florida Department of Health STEPS Public Health Approach: The COVID-19 Response Plan and Outcomes Through May 31, 2020. *Public Health Reports*. 2020;135(5):560-4.
  23. Auger KA, Shah SS, Richardson T, Hartley D, Hall M, Warniment A, et al. Association Between Statewide School Closure and COVID-19 Incidence and Mortality in the US. *JAMA*. 2020;324(9):859-70.
  24. Siedner MJ, Harling G, Reynolds Z, Gilbert RF, Haneuse S, Venkataramani AS, et al. Social distancing to slow the US COVID-19 epidemic: Longitudinal pretest-posttest comparison group study. *PLoS Medicine*. 2020;17(8 August).
  25. Wan H, Cui JA, Yang GJ. Risk estimation and prediction of the transmission of coronavirus disease-2019 (COVID-19) in the mainland of China excluding Hubei province. *Infectious Diseases of Poverty*. 2020;9(1).
  26. Du Z, Xu X, Wang L, Fox SJ, Cowling BJ, Galvani AP, et al. Effects of Proactive Social Distancing on COVID-19 Outbreaks in 58 Cities, China. *Emerging infectious diseases*. 2020;26(9).
  27. Zhang J, Litvinova M, Liang Y, Wang Y, Wang W, Zhao S, et al. Changes in contact patterns shape the dynamics of the COVID-19 outbreak in China. *Science (New York, NY)*. 2020;368(6498):1481-6.
  28. Pan A, Liu L, Wang C, Guo H, Hao X, Wang Q, et al. Association of Public Health Interventions with the Epidemiology of the COVID-19 Outbreak in Wuhan, China. *JAMA - Journal of the American Medical Association*. 2020;323(19):1915-23.
  29. Marschner IC. Back-projection of COVID-19 diagnosis counts to assess infection incidence and control measures: Analysis of Australian data. *Epidemiology and Infection*. 2020.
  30. Koh WC, Naing L, Wong J. Estimating the impact of physical distancing measures in containing COVID-19: an empirical analysis. *International Journal of Infectious Diseases*. 2020;100:42-9.
  31. Courtemanche C, Garuccio J, Le A, Pinkston J, Yelowitz A. Strong Social Distancing Measures In The United States Reduced The COVID-19 Growth Rate. *Health affairs (Project Hope)*. 2020;39(7):1237-46.
  32. Thu TPB, Ngoc PNH, Hai NM, Tuan LA. Effect of the social distancing measures on the spread of COVID-19 in 10 highly infected countries. *Science of the Total Environment*. 2020;742 (no pagination)(140430).
  33. Lam HY, Lam TS, Wong CH, Lam WH, Leung CME, Au KWA, et al. The epidemiology of COVID-19 cases and the successful containment strategy in Hong Kong-January to May 2020. *International Journal of Infectious Diseases*. 2020;98:51-8.
  34. Cruz CHB. Social distancing in Sao Paulo State: demonstrating the reduction in cases using time series analysis of deaths due to COVID-19. *Rev Bras Epidemiol*. 2020;23:e200056.
  35. Huynh TLD. Does culture matter social distancing under the COVID-19 pandemic? *Saf Sci*. 2020;130:104872.
  36. Zhang R, Li Y, Zhang AL, Wang Y, Molina MJ. Identifying airborne transmission as the dominant route for the spread of COVID-19. *Proc Natl Acad Sci U S A*. 2020;117(26):14857-63.
  37. Lai CKC, Ng RWY, Wong MCS, Chong KC, Yeoh YK, Chen Z, et al. Epidemiological characteristics of the first 100 cases of coronavirus disease 2019 (COVID-19) in Hong Kong Special Administrative Region, China, a city with a stringent containment policy. *Int J Epidemiol*. 2020;49(4):1096-105.
  38. Correia S, Luck S, Verner E. Pandemics Depress the Economy, Public Health Interventions Do Not: Evidence from the 1918 Flu. *SSRN Electronic Journal*. 2020.
  39. Abel T, McQueen D. The COVID-19 pandemic calls for spatial distancing and social closeness: not for social distancing! *Int J Public Health*. 2020;65(3):231.
  40. Kim SW, Su KP. Using psychoneuroimmunity against COVID-19. *Brain Behav Immun*. 2020;87:4-5.
  41. Castaneda-Babarro A, Coca A, Arbillaga-Etxarri A, Gutierrez-Santamaria B. Physical activity change during COVID-19 confinement. *International Journal of Environmental Research and Public Health*. 2020;17(18):1-10.



- 1 42. Jarvis CI, Van Zandvoort K, Gimma A, Prem K, Klepac P, Rubin GJ, et al. Quantifying the impact of  
2 physical distance measures on the transmission of COVID-19 in the UK. *BMC medicine*. 2020;18:1-10.
- 3 43. Juni P, Rothenbuhler M, Bobos P, Thorpe KE, da Costa BR, Fisman DN, et al. Impact of climate and  
4 public health interventions on the COVID-19 pandemic: a prospective cohort study. *CMAJ*.  
5 2020;192(21):E566-E73.
- 6 44. Khanna RC, Cicinelli MV, Gilbert SS, Honavar SG, Murthy GSV. COVID-19 pandemic: Lessons  
7 learned and future directions. *Indian journal of ophthalmology*. 2020;68(5):703-10.
- 8 45. Lasry A, Kidder D, Hast M, Poovey J, Sunshine G, Winglee K, et al. Timing of Community Mitigation  
9 and Changes in Reported COVID-19 and Community Mobility - Four U.S. Metropolitan Areas,  
10 February 26-April 1, 2020. *Mmwr*. 2020;Morbidity and mortality weekly report. 69(15):451-7.
- 11 46. Munayco CV, Tariq A, Rothenberg R, Soto-Cabezas GG, Reyes MF, Valle A, et al. Early transmission  
12 dynamics of COVID-19 in a southern hemisphere setting: Lima-Peru: February 29<sup>th</sup>-March  
13 30<sup>th</sup>, 2020. *Infectious Disease Modelling*. 2020;5:338-45.
- 14 47. Patel P, Athotra A, Vaisakh TP, Dikid T, Jain SK. Impact of nonpharmacological interventions on  
15 COVID-19 transmission dynamics in India. *Indian journal of public health*.  
16 2020;64(Supplement):S142-S6.
- 17 48. Saez M, Tobias A, Varga D, Barceló MA. Effectiveness of the measures to flatten the epidemic curve of  
18 COVID-19. The case of Spain. *Science of the Total Environment*. 2020;727:138761.
- 19 49. Vokó Z, Pitter JG. The effect of social distance measures on COVID-19 epidemics in Europe: an  
20 interrupted time series analysis. *GeroScience*. 2020;42(4):1075-82.
- 21 50. Wilasang C, Sararat C, Jitsuk NC, Yolai N, Thammawijaya P, Auewarakul P, et al. Reduction in  
22 effective reproduction number of COVID-19 is higher in countries employing active case detection with  
23 prompt isolation. *Journal of travel medicine*. 2020;08.
- 24 51. Yehya N, Venkataramani A, Harhay MO. Statewide Interventions and Covid-19 Mortality in the United  
25 States: An Observational Study. *Clinical infectious diseases : an official publication of the Infectious  
26 Diseases Society of America*. 2020;08.
- 27
- 28
- 29
- 30
- 31
- 32
- 33
- 34
- 35
- 36
- 37
- 38
- 39
- 40
- 41
- 42
- 43
- 44
- 45
- 46
- 47
- 48
- 49
- 50
- 51
- 52
- 53
- 54
- 55
- 56
- 57
- 58
- 59
- 60

**Figure 1. PRISMA flow diagram of literature search and selection**

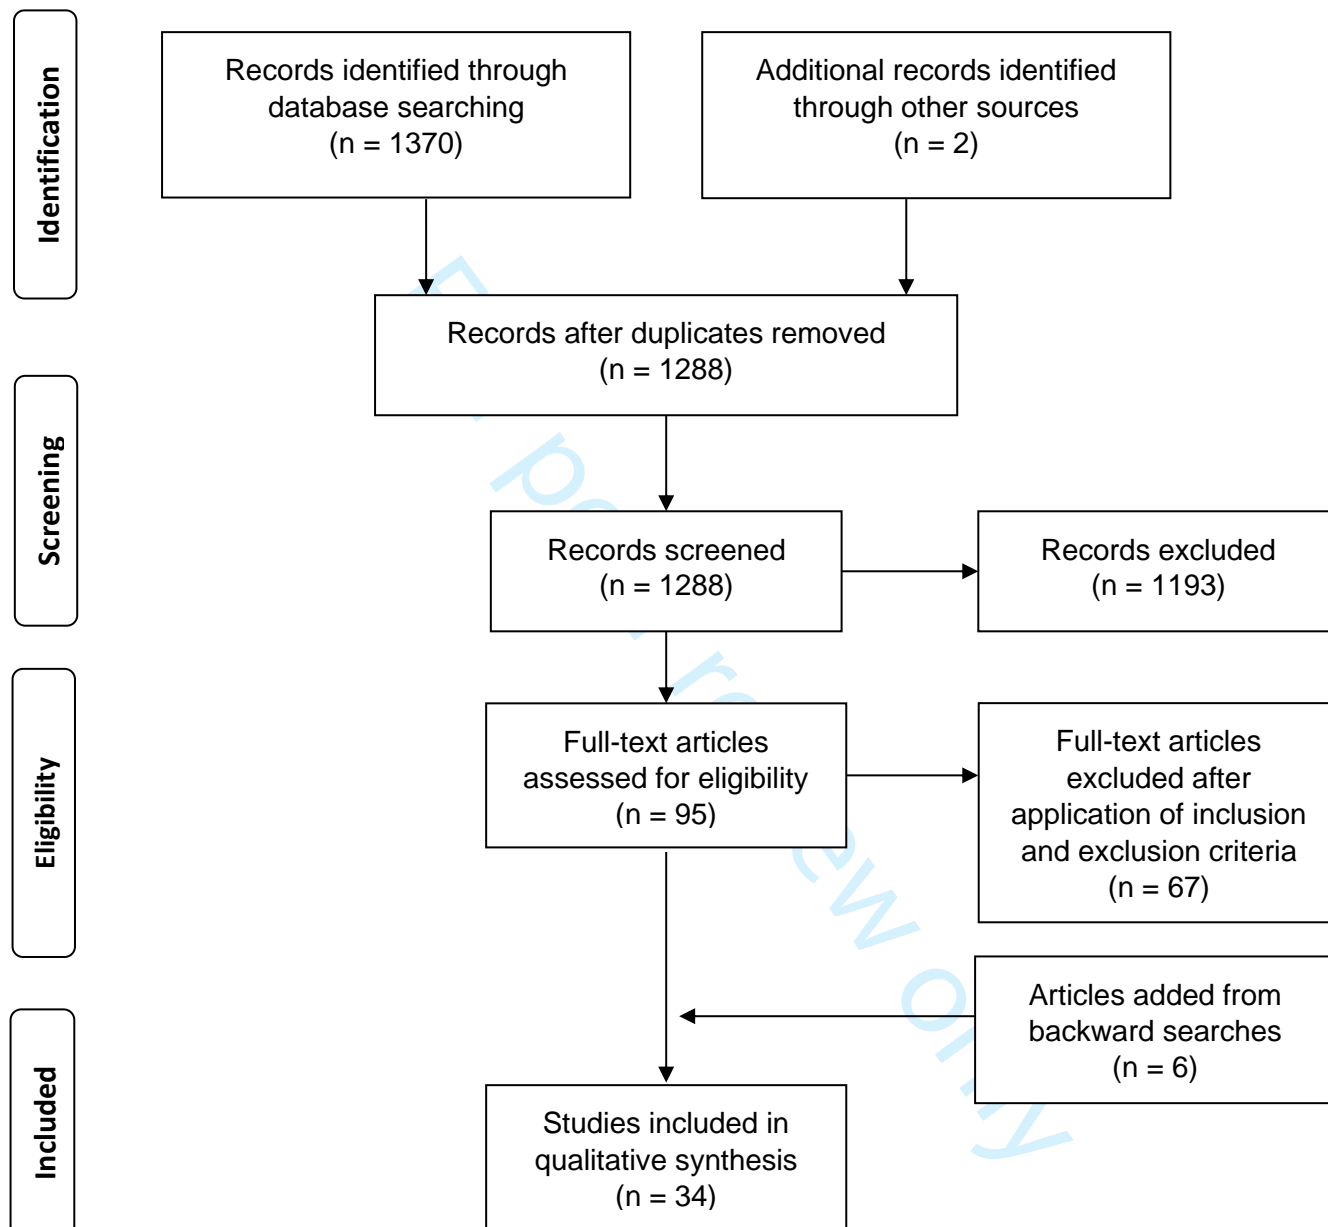

## Preferred Reporting Items for Systematic reviews and Meta-Analyses extension for Scoping Reviews (PRISMA-ScR) Checklist

| SECTION                                               | ITEM | PRISMA-ScR CHECKLIST ITEM                                                                                                                                                                                                                                                                                  | REPORTED ON PAGE #                        |
|-------------------------------------------------------|------|------------------------------------------------------------------------------------------------------------------------------------------------------------------------------------------------------------------------------------------------------------------------------------------------------------|-------------------------------------------|
| <b>TITLE</b>                                          |      |                                                                                                                                                                                                                                                                                                            |                                           |
| Title                                                 | 1    | Identify the report as a scoping review.                                                                                                                                                                                                                                                                   | 1                                         |
| <b>ABSTRACT</b>                                       |      |                                                                                                                                                                                                                                                                                                            |                                           |
| Structured summary                                    | 2    | Provide a structured summary that includes (as applicable): background, objectives, eligibility criteria, sources of evidence, charting methods, results, and conclusions that relate to the review questions and objectives.                                                                              | 2                                         |
| <b>INTRODUCTION</b>                                   |      |                                                                                                                                                                                                                                                                                                            |                                           |
| Rationale                                             | 3    | Describe the rationale for the review in the context of what is already known. Explain why the review questions/objectives lend themselves to a scoping review approach.                                                                                                                                   | 4-5                                       |
| Objectives                                            | 4    | Provide an explicit statement of the questions and objectives being addressed with reference to their key elements (e.g., population or participants, concepts, and context) or other relevant key elements used to conceptualize the review questions and/or objectives.                                  | 5                                         |
| <b>METHODS</b>                                        |      |                                                                                                                                                                                                                                                                                                            |                                           |
| Protocol and registration                             | 5    | Indicate whether a review protocol exists; state if and where it can be accessed (e.g., a Web address); and if available, provide registration information, including the registration number.                                                                                                             | <a href="#">Click here to enter text.</a> |
| Eligibility criteria                                  | 6    | Specify characteristics of the sources of evidence used as eligibility criteria (e.g., years considered, language, and publication status), and provide a rationale.                                                                                                                                       | 6                                         |
| Information sources*                                  | 7    | Describe all information sources in the search (e.g., databases with dates of coverage and contact with authors to identify additional sources), as well as the date the most recent search was executed.                                                                                                  | 6                                         |
| Search                                                | 8    | Present the full electronic search strategy for at least 1 database, including any limits used, such that it could be repeated.                                                                                                                                                                            | 6                                         |
| Selection of sources of evidence†                     | 9    | State the process for selecting sources of evidence (i.e., screening and eligibility) included in the scoping review.                                                                                                                                                                                      | 6-7                                       |
| Data charting process‡                                | 10   | Describe the methods of charting data from the included sources of evidence (e.g., calibrated forms or forms that have been tested by the team before their use, and whether data charting was done independently or in duplicate) and any processes for obtaining and confirming data from investigators. | 7                                         |
| Data items                                            | 11   | List and define all variables for which data were sought and any assumptions and simplifications made.                                                                                                                                                                                                     | 8                                         |
| Critical appraisal of individual sources of evidence§ | 12   | If done, provide a rationale for conducting a critical appraisal of included sources of evidence; describe the methods used and how this information was used in any data synthesis (if appropriate).                                                                                                      | <a href="#">Click here to enter text.</a> |

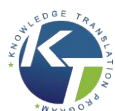

| SECTION                                       | ITEM | PRISMA-ScR CHECKLIST ITEM                                                                                                                                                                       | REPORTED ON PAGE #        |
|-----------------------------------------------|------|-------------------------------------------------------------------------------------------------------------------------------------------------------------------------------------------------|---------------------------|
| Synthesis of results                          | 13   | Describe the methods of handling and summarizing the data that were charted.                                                                                                                    | 7                         |
| <b>RESULTS</b>                                |      |                                                                                                                                                                                                 |                           |
| Selection of sources of evidence              | 14   | Give numbers of sources of evidence screened, assessed for eligibility, and included in the review, with reasons for exclusions at each stage, ideally using a flow diagram.                    | 7                         |
| Characteristics of sources of evidence        | 15   | For each source of evidence, present characteristics for which data were charted and provide the citations.                                                                                     | 8-13, 24-35               |
| Critical appraisal within sources of evidence | 16   | If done, present data on critical appraisal of included sources of evidence (see item 12).                                                                                                      | Click here to enter text. |
| Results of individual sources of evidence     | 17   | For each included source of evidence, present the relevant data that were charted that relate to the review questions and objectives.                                                           | 24-35                     |
| Synthesis of results                          | 18   | Summarize and/or present the charting results as they relate to the review questions and objectives.                                                                                            | 8-13, 36-37               |
| <b>DISCUSSION</b>                             |      |                                                                                                                                                                                                 |                           |
| Summary of evidence                           | 19   | Summarize the main results (including an overview of concepts, themes, and types of evidence available), link to the review questions and objectives, and consider the relevance to key groups. | 13-14                     |
| Limitations                                   | 20   | Discuss the limitations of the scoping review process.                                                                                                                                          | 18                        |
| Conclusions                                   | 21   | Provide a general interpretation of the results with respect to the review questions and objectives, as well as potential implications and/or next steps.                                       | 19                        |
| <b>FUNDING</b>                                |      |                                                                                                                                                                                                 |                           |
| Funding                                       | 22   | Describe sources of funding for the included sources of evidence, as well as sources of funding for the scoping review. Describe the role of the funders of the scoping review.                 | 20                        |

JBI = Joanna Briggs Institute; PRISMA-ScR = Preferred Reporting Items for Systematic reviews and Meta-Analyses extension for Scoping Reviews.

\* Where *sources of evidence* (see second footnote) are compiled from, such as bibliographic databases, social media platforms, and Web sites.

† A more inclusive/heterogeneous term used to account for the different types of evidence or data sources (e.g., quantitative and/or qualitative research, expert opinion, and policy documents) that may be eligible in a scoping review as opposed to only studies. This is not to be confused with *information sources* (see first footnote).

‡ The frameworks by Arksey and O'Malley (6) and Levac and colleagues (7) and the JBI guidance (4, 5) refer to the process of data extraction in a scoping review as data charting.

§ The process of systematically examining research evidence to assess its validity, results, and relevance before using it to inform a decision. This term is used for items 12 and 19 instead of "risk of bias" (which is more applicable to systematic reviews of interventions) to include and acknowledge the various sources of evidence that may be used in a scoping review (e.g., quantitative and/or qualitative research, expert opinion, and policy document).

From: Tricco AC, Lillie E, Zarin W, O'Brien KK, Colquhoun H, Levac D, et al. PRISMA Extension for Scoping Reviews (PRISMA-ScR): Checklist and Explanation. *Ann Intern Med.* 2018;169:467–473. doi: 10.7326/M18-0850.

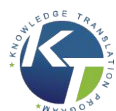

St. Michael's

Inspired Care.  
Inspiring Science.

For peer review only - <http://bmjopen.bmj.com/site/about/guidelines.xhtml>

# BMJ Open

## Effectiveness of different types and levels of social distancing measures: a scoping review of global evidence from earlier stage of COVID-19 pandemic

|                                 |                                                                                                                                                                                                                                                                                                                                                                                                                                                                                                                                                                                                                                                                                                                                                                                                                 |
|---------------------------------|-----------------------------------------------------------------------------------------------------------------------------------------------------------------------------------------------------------------------------------------------------------------------------------------------------------------------------------------------------------------------------------------------------------------------------------------------------------------------------------------------------------------------------------------------------------------------------------------------------------------------------------------------------------------------------------------------------------------------------------------------------------------------------------------------------------------|
| Journal:                        | <i>BMJ Open</i>                                                                                                                                                                                                                                                                                                                                                                                                                                                                                                                                                                                                                                                                                                                                                                                                 |
| Manuscript ID                   | bmjopen-2021-053938.R1                                                                                                                                                                                                                                                                                                                                                                                                                                                                                                                                                                                                                                                                                                                                                                                          |
| Article Type:                   | Original research                                                                                                                                                                                                                                                                                                                                                                                                                                                                                                                                                                                                                                                                                                                                                                                               |
| Date Submitted by the Author:   | 23-Dec-2021                                                                                                                                                                                                                                                                                                                                                                                                                                                                                                                                                                                                                                                                                                                                                                                                     |
| Complete List of Authors:       | Sun, Kai Sing; The Chinese University of Hong Kong, The Jockey Club School of Public Health and Primary Care<br>Lau, Terence See-Man; The Chinese University of Hong Kong, The Jockey Club School of Public Health and Primary Care<br>Yeoh, EK; The Chinese University of Hong Kong, The Jockey Club School of Public Health and Primary Care<br>Chung, Vincent; The Chinese University of Hong Kong, The Jockey Club School of Public Health and Primary Care<br>Leung, Yin Shan; The Chinese University of Hong Kong, The Jockey Club School of Public Health and Primary Care<br>Yam, Carrie; The Chinese University of Hong Kong, The Jockey Club School of Public Health and Primary Care<br>Hung, Chi-Tim; The Chinese University of Hong Kong, The Jockey Club School of Public Health and Primary Care |
| <b>Primary Subject Heading</b>: | Infectious diseases                                                                                                                                                                                                                                                                                                                                                                                                                                                                                                                                                                                                                                                                                                                                                                                             |
| Secondary Subject Heading:      | Public health, Epidemiology, Health policy                                                                                                                                                                                                                                                                                                                                                                                                                                                                                                                                                                                                                                                                                                                                                                      |
| Keywords:                       | COVID-19, EPIDEMIOLOGY, Infection control < INFECTIOUS DISEASES, Public health < INFECTIOUS DISEASES                                                                                                                                                                                                                                                                                                                                                                                                                                                                                                                                                                                                                                                                                                            |
|                                 |                                                                                                                                                                                                                                                                                                                                                                                                                                                                                                                                                                                                                                                                                                                                                                                                                 |

SCHOLARONE™  
Manuscripts



I, the Submitting Author has the right to grant and does grant on behalf of all authors of the Work (as defined in the below author licence), an exclusive licence and/or a non-exclusive licence for contributions from authors who are: i) UK Crown employees; ii) where BMJ has agreed a CC-BY licence shall apply, and/or iii) in accordance with the terms applicable for US Federal Government officers or employees acting as part of their official duties; on a worldwide, perpetual, irrevocable, royalty-free basis to BMJ Publishing Group Ltd ("BMJ") its licensees and where the relevant Journal is co-owned by BMJ to the co-owners of the Journal, to publish the Work in this journal and any other BMJ products and to exploit all rights, as set out in our [licence](#).

The Submitting Author accepts and understands that any supply made under these terms is made by BMJ to the Submitting Author unless you are acting as an employee on behalf of your employer or a postgraduate student of an affiliated institution which is paying any applicable article publishing charge ("APC") for Open Access articles. Where the Submitting Author wishes to make the Work available on an Open Access basis (and intends to pay the relevant APC), the terms of reuse of such Open Access shall be governed by a Creative Commons licence – details of these licences and which [Creative Commons](#) licence will apply to this Work are set out in our licence referred to above.

Other than as permitted in any relevant BMJ Author's Self Archiving Policies, I confirm this Work has not been accepted for publication elsewhere, is not being considered for publication elsewhere and does not duplicate material already published. I confirm all authors consent to publication of this Work and authorise the granting of this licence.

1  
2  
3 **Effectiveness of different types and levels of social distancing measures:**  
4 **a scoping review of global evidence from earlier stage of COVID-19**  
5 **pandemic**  
6  
7  
8  
9

10  
11  
12  
13 Kai-Sing Sun<sup>1#</sup>, Terence See-Man Lau<sup>1#</sup>, Eng-Kiong Yeoh<sup>1\*</sup>, Vincent Chi-Ho Chung<sup>1</sup>, Yin Shan  
14 Leung<sup>1</sup>, Carrie Ho-Kwan Yam<sup>1</sup>, Chi-Tim Hung<sup>1</sup>  
15  
16

17  
18  
19 <sup>1</sup>The Jockey Club School of Public Health and Primary Care, The Chinese University of Hong Kong,  
20 Hong Kong, China  
21  
22

23  
24 **#Co-first authors**  
25  
26  
27  
28  
29  
30  
31

32 **\*Corresponding author:**  
33

34 Prof Eng-Kiong Yeoh  
35

36 Address: 2/F, School of Public Health Building, Prince of Wales Hospital, Shatin, Hong Kong  
37

38 Email: [yeoh\\_ek@cuhk.edu.hk](mailto:yeoh_ek@cuhk.edu.hk)  
39

40 Tel: (852) 2252 8702 Fax: (852) 2145 7489  
41  
42  
43  
44  
45  
46  
47  
48  
49  
50  
51  
52  
53  
54  
55  
56  
57  
58  
59  
60

## Abstract

**Objective:** Social distancing is the critical measure in the control of the COVID-19 pandemic before achieving herd immunity through effective vaccination of global populations. This scoping review aims to synthesize research findings on the effectiveness of different types and levels of social distancing measures in earlier stage of COVID-19 pandemic without confounding effect of mass vaccination.

**Design:** Scoping review.

**Data sources:** MEDLINE, Embase, Global Health and four other databases were searched for eligible studies on social distancing for COVID-19 published from inception of the databases to 30 September 2020.

**Study selection and data extraction:** Effectiveness studies on social distancing between individuals, school closure, workplace/business closures, public transport restriction and “partial”/full lockdown were included. Non-English articles, studies in healthcare settings or not based on empirical data were excluded.

**Results:** After screening 1638 abstracts and 8 additional articles from other sources, 41 studies were included for synthesis of findings. The review found that the outcomes of social distancing measures were mainly indicated by changes in  $R_t$ , incidence and mortality, along with indirect indicators such as daily contact frequency and travel distance. There was adequate empirical evidence for the effect of social distancing at individual level, and for partial or full lockdown at community level. However, at the level of social settings, the evidence was moderate for school closure, and limited for workplace/business closures as a single type of intervention. There was no evidence for the separate effect of public transport restriction.

**Conclusions:** In the community setting, there was stronger evidence on the combined effect of different social distancing interventions than for a single one. As fatigue of preventive behaviors is on the top of the public health agenda, future studies should analyze risk in specific settings such as eateries and entertainment to implement and evaluate measures which are proportionate to the risk.

**Keywords:** COVID-19, effectiveness, incidence, scoping review, social distancing



## Strengths and limitations of this study

- First scoping review to synthesize findings on the effectiveness of social distancing measures for COVID-19 at individual, social settings and national levels in a variety of outcome parameters.
- This review shows the amount of evidence for different types and levels of social distancing measures.
- Findings in varied outcome parameters could not be compared directly.
- Non-English literature was excluded from this review.

For peer review only

## Introduction

Social distancing is the most important measure to control the outbreak of COVID-19 worldwide before herd immunity can be achieved through effective vaccination (1). Social distancing, also known as physical distancing, is based on the premise that the rate of transmission of infectious diseases will decrease if people in communities stay at home from work or school, avoid large gatherings and refrain from having physical contact with one another. World Health Organization (WHO) guidelines describe social distancing measures at the individual level, e.g. keeping at least one meter from each other; at the community level generally, e.g. stay-at-home recommendation/ordinances; or in specific socio-economic settings e.g. measures for workplace, schools, eateries, entertainment and parties (2, 3). At the national or regional levels, lockdown (also called “community quarantine” to restrict movement of population groups) may be imposed as an extreme form of social distancing (4, 5), where it can be total or “partial” when key socio-economic activities are restricted (6).

Despite the fact that social distancing measures have become a crucial strategy globally to mitigate COVID-19 pandemic, the evidence for their effectiveness is just slowly accruing. Earlier studies applied mathematical modelling to predict effectiveness of social distancing measures (7-10). Recent studies evaluated the outcomes retrospectively using empirical data and reported the outcomes in specific parameters. A study analyzed data from 149 countries suggested that implementation of any social distancing intervention was associated with an overall reduction in COVID-19 incidence of 13% (IRR 0.87, 95% CI: 0.85 - 0.89) (11). It concluded that data from 11 countries indicated similar overall effectiveness (pooled IRR 0.85, 0.81 to 0.89) when school closures, workplace closures, and restrictions on mass gatherings were in place (11). The European Centre for Disease Prevention and Control (ECDC) also estimated the effectiveness of different types of social distancing in Europe. While most were based on prediction modelling, some retrospective analysis showed that lockdown reduced  $R_t$  from around 2.7 to around 0.6 in the UK (12). Given the different types, variations and

1  
2  
3 combinations of social distancing measures were implemented at different levels in different  
4 jurisdictions and pandemic contexts, it is important to study what parameters and methods were used  
5 and what outcomes were measured in various research studies. This is critical in a protracted pandemic  
6 and what outcomes were measured in various research studies. This is critical in a protracted pandemic  
7 after continuing restrictions to self-determinants and socio-economic life, which have led to fatigue in  
8 preventive behaviors. In this context, targeted measures which have been evaluated proportionate to  
9 the risks should motivate continuing preventive behaviors.  
10  
11  
12  
13  
14  
15  
16  
17  
18

19 The aim of this study was to synthesize research findings on the effectiveness of different types and  
20 levels of social distancing measures during earlier stage of COVID-19 pandemic. The study was  
21 conducted as a scoping review to include a broad range of outcome parameters and study designs. This  
22 enables a better understanding the effectiveness of the spectrum of social distancing measures in  
23 controlling COVID-19 outbreak.  
24  
25  
26  
27  
28  
29  
30  
31  
32  
33  
34

## 35 **Methods**

36  
37  
38 The scoping review method was applied to include a range of parameters relating to effectiveness of  
39 social distancing measures during COVID-19 pandemic. In contrast to a systematic review which  
40 answers a specific and narrow question, a scoping review aims to explore a set of emerging and diverse  
41 themes to synthesize the current evidence, clarify conceptual parameters and identify gaps for further  
42 research (13-15).  
43  
44  
45  
46  
47  
48  
49  
50

## 51 **Eligibility criteria**

52 Inclusion criteria for this review were studies that described: 1) effectiveness or outcomes of social  
53 distancing measures targeting the general public; 2) social distancing measures including those  
54 between individuals; targeted measures on including closures of schools, workplaces, restaurants and  
55  
56  
57  
58  
59  
60

1  
2  
3 bars, and other social settings; stay-at-home recommendation or ordinances, community quarantine  
4 and lockdown; and 3) quantitative research, secondary data analysis, modelling studies based on  
5 empirical data, and review articles.  
6  
7  
8  
9

10  
11  
12 Exclusion criteria were: 1) qualitative studies, commentaries, mini-reviews without search strategies,  
13 editorials, conference presentations, dissertations, and book chapters); 2) non-English articles; 3)  
14 studies in healthcare settings, such as those on healthcare workers, hospital patients and elderly nursing  
15 homes; 4) studies on the impact of social distancing measures on non-COVID-19 diseases and  
16 psychosocial health of the public; and 5) hypothetical/stimulation models predicting future trends of  
17 incidence.  
18  
19  
20  
21  
22  
23  
24  
25

### 26 27 28 **Search strategies and study selection** 29

30  
31 Seven electronic databases including AMED, Embase, Global Health, MEDLINE, Ovid Nursing  
32 Database, APA PsycInfo, Social Work Abstracts were searched by an experienced team member in  
33 scoping and systematic reviews. The search period was from the inception of the databases to 30  
34 September 2020. To enhance sensitivity, syntax of *"COVID\*".m\_titl. AND social distan\*.ab* and  
35 *"COVID\*".m\_titl. AND physical distan\*.ab* were used as search strategies to cover both terms of social  
36 distancing and physical distancing. Additional syntax of *"SARS-CoV-2\*".m\_titl. and (social distan\*  
37 or physical distan\*).ab*. were used to search for articles using the keyword 'SARS-CoV-2'. Details are  
38 shown in the supplementary file. Furthermore, backward searches from the reference lists of the  
39 articles to locate additional articles and reports. The search and selection process followed the Joanna  
40 Briggs Institute Methods Manual for scoping reviews, and the reporting was guided by PRISMA  
41 Extension for Scoping Reviews (PRISMA-ScR)(16). Two reviewers independently screened the titles  
42 and abstracts to assess their eligibility. Full texts of potential citations were retrieved for detailed  
43 examination. Selection discrepancies were settled through discussions between these two reviewers.  
44  
45  
46  
47  
48  
49  
50  
51  
52  
53  
54  
55  
56  
57  
58  
59  
60

1  
2  
3 Any outstanding disagreements were resolved by consulting the third member. We did not conduct  
4 risk of bias assessment, which is consistent with recommendations from the Joanna Briggs Institute  
5  
6 Scoping Review Methods Manual and PRISMA-ScR (16). Different from a systematic review, a  
7  
8 scoping review aims to provide an overview of the existing evidence comprehensively, regardless of  
9  
10 risk of bias of included studies (16).  
11  
12  
13  
14  
15  
16

### 17 **Data extraction and synthesis**

18  
19 For each study included, texts under the headings of ‘results’ or ‘findings’ were extracted and analyzed  
20  
21 by two reviewers. The analysis was performed by one reviewer and verified by a second reviewer. The  
22  
23 two reviewers reached consensus upon the outcomes reported and the classification of their types of  
24  
25 social distancing and effectiveness indicators.  
26  
27  
28  
29  
30

### 31 **Patient and public involvement statement**

32 It was not appropriate or possible to involve patients or the public in the design, or conduct, or  
33  
34 reporting, or dissemination plans of our research  
35  
36  
37  
38  
39

## 40 **Results**

### 41 **Study selection and characteristics**

42  
43 We screened 1638 abstracts from our electronic search on the databases with 2 additional research  
44  
45 reports being identified from governmental websites. Of the 120 full texts retrieved for further  
46  
47 assessment, 35 articles fulfilled our eligibility criteria. In addition, 6 relevant studies were identified  
48  
49 from the reference lists of the articles through backward searches. Hence, in total, 41 studies were  
50  
51 included in this review. Figure 1 presents results of the literature search and classification flow, and  
52  
53 Table 1 provides detailed characteristics of the selected articles.  
54  
55  
56  
57  
58  
59  
60

1  
2  
3 (Insert Figure 1 and Table 1 here)  
4  
5  
6  
7

8 There were 38 research studies and 3 reviews. Fourteen studies reported data from North America,  
9 another 13 from Asia, 12 from Europe, 3 from South America and 2 from Australia. There were also  
10 3 global studies which reported data from over 50 countries in multiple regions. According to the  
11 classification by World Bank (15), 63.5% of the studies were from high-income countries/regions,  
12 30.8% from middle-income and 5.8% from low-income countries/regions.  
13  
14  
15  
16  
17  
18  
19  
20

21 Table 2 summarizes the key findings based on the effectiveness indicators including the following  
22 aspects: 1) Infectivity:  $R_t$ , effective reduction number; 2) Incidence: infection incidence, ratio of  
23 incidence rate, attack rate, or bed occupancy rate; 3) Mortality or fatality rate; 4) Effect time: action  
24 and effect duration, time of reaching peak; 5) Attendance percentage of location, daily vehicles miles,  
25 daily contact frequency, mobility of leaving home, or travel distance. A description of each type of  
26 intervention is also given. A tick “✓” is put if no detailed elaboration was provided in the reviewed  
27 articles.  
28  
29  
30  
31  
32  
33  
34  
35  
36  
37  
38  
39

40 (Insert Table 2 here)  
41  
42  
43  
44

### 45 **Social distancing at individual level**

46  
47 Social distancing measure was usually achieved by the prohibition of mass gathering in public areas  
48 and/ or maintaining certain physical distance between people. Most studies reported a positive  
49 relationship between the transmission risk and certain level of social distancing. A meta-analysis  
50 including seven studies on COVID-19 concluded that physical distancing of 1 meter or more was  
51 effective to reduce the transmission risk by 5 times and the protective impact was double for every  
52 extra meter (17). Similarly, based on the chronological data on interventions in 41 countries between  
53  
54  
55  
56  
57  
58  
59  
60

1  
2  
3 January and May 2020, Brauner et al. (18) estimated that  $R_t$  reduced by 36%, 28% and 12% when  
4 gatherings were limited to 10, 100 and 1,000 people respectively. Furthermore, studies also found how  
5 mobility changed according to different social distancing measures. A study by Weill et al. (19) in the  
6 U.S. found that median distance traveled, retail and recreation locations visited by a mobile device per  
7 day showed a sharp decrease in March 2020 after the implementation of social distancing measures in  
8 the country, while percentage of completely staying at home doubled. Similar results also showed that  
9 a decline in visits to nonessential businesses following the implementation of social distancing was  
10 associated with a drop in estimated  $R_t$  (20). In the analysis of 211 US counties, visits to nonessential  
11 businesses reduced by 50% and 70% would contribute to a 45% decline in  $R_t$  and a drop of  $R_t$  to a  
12 threshold of 1.0 respectively, indicating the larger the drop in nonessential business visits, the more  
13 significance in the fall of a  $R_t$  (20). Another US study by Clipman et al. (21), in Maryland, found that  
14 history of COVID-19 infection was significantly less likely among the public who always practised  
15 social distancing (aOR for indoor social distancing, 0.32 [95% CI, .10–.99]; aOR for outdoor social  
16 distancing, 0.10 [95% CI, .03–.33]), giving some hints on the implications of mobility during the  
17 pandemic. It was consistent with the inference by Lemaitre et al. (22) who found a strong support for  
18 changes in  $R_0$  following the mobility decline before implementation of school closure, underlining the  
19 importance of behavior changes on the reductions in transmission. However, social distancing in  
20 different settings may have different impacts. The UK Scientific Advisory Group for Emergencies  
21 (SAGE) meeting report (23) suggested that stopping contact from different households would provide  
22 moderate impact by reducing  $R_t$  of 0.1-0.2 but the impact of physical distancing on outdoor gathering  
23 was minimal ( $R_t$  reduction  $<0.05$ ) since good ventilation was usually observed.  
24  
25  
26  
27  
28  
29  
30  
31  
32  
33  
34  
35  
36  
37  
38  
39  
40  
41  
42  
43  
44  
45  
46  
47  
48  
49  
50  
51  
52  
53  
54

## 55 **Social distancing at level of community settings**

### 58 *School closure*



1  
2  
3 School closure may have benefits during the pandemic, but the effectiveness was mixed when  
4 considering levels of closures and the unexpected link between school closure and school opening.  
5  
6 Rivkees's (24) study in Florida of the U.S. found that closing schools resulted in a 40-55% reduction  
7  
8 in average distance traveled compared with pre-outbreak levels. Moreover, Auger et al. (25) found that  
9  
10 the primary and secondary school closure in the U.S. between March and May 2020 was associated  
11  
12 with decreased COVID-19 incidence (adjusted relative change per week, -62%) and mortality (-58%).  
13  
14 On the other hand, the SAGE report (23) suggested that closing secondary schools and further  
15  
16 education could have more impact, even though a moderate  $R_t$  drop of 0.1 – 0.5 was associated with  
17  
18 mass school closure, as mature students worked in daytime and linked up infection pathways between  
19  
20 workplace and households. It was also proposed that states closing schools earlier, when cumulative  
21  
22 incidence of COVID-19 was low, had the largest relative reduction in incidence and mortality,  
23  
24 although there might be confounding effects from other interventions (26). Contrary to expected  
25  
26 impacts of school closures, observational data in ECDC review suggested that re-opening schools had  
27  
28 not been associated with significant increases of community transmission (12). In other studies (27,  
29  
30 28) that focused on the various measures used in educational and children care center settings after  
31  
32 reopening, results showed low incidence rate in these settings. There was a decreasing trend of both  
33  
34 the average outbreak numbers and the cases per outbreak by school measures and it might be partially  
35  
36 due to the extensive measures. Meanwhile, the specific impact of reduction of face-to-face attendance  
37  
38 in classrooms was not be assessed (29).  
39  
40  
41  
42  
43  
44  
45  
46  
47  
48  
49

### 50 ***Workplace measures***

51  
52  
53 Workplace measures include work-from-home arrangement, measures in working environment and  
54  
55 the closure of businesses. The SAGE report (23) suggested a moderate impact of work-from-home  
56  
57 measure, with a reduction of  $R_t$  between 0.2 and 0.4. Brauner et al. (18) estimated that a 29%  $R_t$   
58  
59  
60

1  
2  
3 reduction was likely to follow with closing most of non-essential businesses while closing high risk  
4  
5 businesses, e.g. bars and restaurants would be associated with a  $R_t$  decline of 20%. Although there was  
6  
7 limited empirical data on the impact of closure of businesses, reduced visits to nonessential businesses  
8  
9 in the US was associated with a drop in  $R_t$  (20).  
10  
11  
12  
13  
14  
15

### 16 ***Public transport restriction***

17  
18 Public transport restriction refers to suspension/ limitation of intra-city or intercity public  
19  
20 transportation. The SAGE report (23) suggested a low to moderate impact following the 5-mile travel  
21  
22 restriction, especially when local outbreak was widespread. It might be because public transport  
23  
24 crowding was low and mandated face-mask policy was already implemented. However, Islam's study  
25  
26 (11) showed no difference in reduction with or without the suspension of public transportation. On the  
27  
28 other hand, ECDC review showed contradictory results, with a modelling study indicating a strong  
29  
30 association with reduction of  $R_t$  while other studies did not show any impact unless introduced with  
31  
32 other NPIs such as social distancing and behavioral changes (12). Therefore, it is difficult to relate  
33  
34 observed changes in transmission dynamics to this single measure of public transport restriction.  
35  
36  
37  
38  
39  
40  
41  
42

### 43 **Social distancing at national/regional level**

#### 44 ***Combination of interventions - "partial" lockdown***

45  
46 While the studies mentioned above focused on the effect of single type of intervention, many studies  
47  
48 showed the effect of a combination of interventions, which could be regarded as a "partial" lockdown.  
49  
50 A study by Siedner et al. (26) in the U.S. found that the mean daily COVID-19 case growth rate fell  
51  
52 by 0.9% per day, starting 4 days after implementation of the first statewide social distancing measures  
53  
54 including cancellation of public events, travel restriction, school and workplace closures. In a study by  
55  
56  
57  
58  
59  
60

1  
2  
3 Randhawa et al.(30), the SARS-CoV-2 positivity rate in Seattle-area outpatient clinics and emergency  
4 departments declined from the peak range of 14.3-17.6% to 3.8-3.9% after statewide physical  
5 distancing measures, such as shutdown of bars/restaurants, implementation of social gathering limit  
6 and stay-home order. A drop of 2% in daily COVID-19-attributed mortality growth rate was also  
7 observed after 7 days the measures were implemented. Similarly, a study by Wan et al. (31) in  
8 Mainland China excluding Hubei (province of Wuhan) found that  $R_t$  has dropped sharply from 3.34  
9 on 20 January 2020 to 0.89 on 31 January 2020 after implementing integrated control strategies. In  
10 Du's study (32) of 58 cities in China, also with a remarkable  $R_t$  drop, at 54.3%, demonstrating the  
11 effectiveness after the implementation of multiple types of interventions.  
12  
13  
14  
15  
16  
17  
18  
19  
20  
21  
22  
23  
24  
25  
26  
27

### 28 ***Full lockdown***

29  
30 Indeed, a full lockdown can be viewed as a combination of all measures. Islam et al. (11) reported a  
31 combination of 4 measures, including restrictions on mass gatherings, school closures, workplace  
32 closures, and lockdowns in 32 countries, were associated with decreasing incidence of COVID-19  
33 (pooled incident rate ratio, IRR 0.87, 0.84 to 0.91). Similar declining incidence was also observed  
34 when public transport closure was added (pooled IRR 0.85, 0.82 to 0.88; n=72 countries). Other than  
35 incidence drop, bed occupancy could be also benefited from lockdown measures. In Lino's study (5),  
36 before the lockdown, the bed occupancy rates for referred COVID-19 cases in a tertiary hospital in  
37 Fortaleza of Brazil were over 100% in the beginning of May and reached nearly 140% after 10 days.  
38 The rates decreased to below 100% and 85% at 14 and 23 days respectively after the lockdown.  
39  
40  
41  
42  
43  
44  
45  
46  
47  
48  
49  
50  
51  
52  
53  
54

55 More evidence showed the effect of lockdown by various indicators. Zhang et al. (33) found that an  
56 average daily number of contacts per survey participant significantly dropped from 14.6 to 2 and 18.8  
57 to 2.3 in Wuhan and Shanghai respectively during the lockdown period, consistent with the respective  
58  
59  
60

1  
2  
3 trends of mobility data declining at 86.9% and 74.5%. Pan et al. (34) analyzed data from Wuhan and  
4  
5 found that the  $R_t$  gradually reduced from larger than 3 in January 2020 to less than 1 in February 2020  
6  
7 and fell further to less than 0.3 in March 2020 after the city lockdown. Lim et al. (35) studied  
8  
9 Southeast Asian countries and found a large variation in social distancing policies across countries,  
10  
11 leading to marked differences in the reduction in  $R_t$ , with the biggest decrease in Malaysia from 3.68  
12  
13 to 1.53 and the smallest decrease in Laos from 1.55 to 1.20. Similarly, a brief report of Rivkees et al.  
14  
15 (24) showed that the stay-at-home order in Florida of the U.S., after the first month of implementation,  
16  
17 resulted in a 74% to 82% reduction in person-to-person encounters, 55% in visits to non-essential  
18  
19 venues and 45% in overall distance traveled. After two months of implementing stay-at-home order,  
20  
21 the average distance traveled within the state was also found to decrease by 25-40%. Further, a  
22  
23 modelling study of Brauner et al. (18) gathering data of 41 countries using NPIs estimated that stay-  
24  
25 at-home orders (with exemptions) reduced the mean percentage of  $R_t$  by 10%. Moreover, in SAGE  
26  
27 report (23), it suggested that the country lockdown was very impactful and could reduce  $R_t$  from 2.7  
28  
29 to 0.6 while 2-3 week short stay-at-home order had moderate impact in reducing  $R_t$  to below 1. As  
30  
31 with all other measures, the earlier the stay-at-home order was implemented, the higher the impact.  
32  
33  
34  
35  
36  
37  
38  
39  
40

### 41 **Implementation points of time and impact on the pandemic curve**

42  
43  
44 Nearly all findings found that a timely implementation of measures could reduce the transmission risk  
45  
46 significantly. The relationships between the timing and the change rates of daily confirmed-cases were  
47  
48 analyzed with a time-series. Marschner et al. (36) used Australia data to back-project that there was a  
49  
50 fivefold increase in total infections if social distancing measures were delayed by one week.  
51  
52 Consistently, in Du's study (32), a 1-day delay in implementing the 1st intervention was expected to  
53  
54 prolong an outbreak by 2.41 days. However, earlier lockdown, simulated by Islam et al. (11), showed  
55  
56 a larger reduction in COVID-19 incidence compared with a delayed one after other social distancing  
57  
58  
59  
60

1  
2  
3 interventions were initiated. Thanks to another empirical study based on the Oxford COVID-19  
4 Government Response Tracker (37), some ideas can be grasped when deciding how to implement a  
5 measure earlier. It tracked Rt temporally for two weeks following the 100th reported case in 140  
6 countries and observed the median timing among them, finding that lockdown measures and travel  
7 bans were considered early if they were implemented around two weeks before the 100<sup>th</sup> case and a  
8 week before detecting the first case respectively (37).  
9  
10  
11  
12  
13  
14  
15  
16  
17  
18  
19  
20

21 In addition, social distancing measures had a progressive control impact on the growth rates of daily  
22 confirmed cases, with Courtemanche et al. (38) showing reductions of 5.4%, 6.8%, 8.2% and 9.1%  
23 after 1-5 days, 6-10 days, 11-15 days, 16-20 days, respectively following the roll-out of the measures.  
24 The timing effect was further illustrated by Thu et al. (39) that social distancing interventions took 1-  
25 4 weeks to have an effect on the decline in number of infected cases among the 10-studied countries.  
26 For those countries with higher growth rates at the beginning may have more difficulties in controlling  
27 the transmission, and vice versa for those countries with initial lower growth rates. For example, China,  
28 Iran and Turkey, promulgating the most stringent level of social distancing measures, with initial  
29 infection growth rates apparently lower at around 60-70%, had the highest decline rates at 71%, 51.8%  
30 and 50.8% respectively while the U.S. and the U.K., having the highest initial growth rates (99.9%),  
31 experienced significantly lower decline rates of 14.8% and 25.9% respectively. The result suggested  
32 that social distancing measures could be more effective when being introduced earlier under situations  
33 with low growth rates.  
34  
35  
36  
37  
38  
39  
40  
41  
42  
43  
44  
45  
46  
47  
48  
49  
50  
51  
52  
53

## 54 **Discussion**

55  
56  
57 This scoping review covered a board range of social distancing interventions and outcome indicators.  
58 A comparison of the key findings of different levels of measures is shown in Table 3. Outcomes were  
59  
60

1  
2  
3 mainly indicated by changes in  $R_t$ , incidence and mortality, along with indirect indicators such as daily  
4 contact frequency and travel distance. Based on changes in  $R_t$ , incidence and mortality, there was  
5  
6 adequate empirical evidence for the effect of social distancing at individual level, and for partial or full  
7  
8 lockdown at community level. However, the evidence was moderate and inconsistent for school  
9  
10 closure, and limited for workplace/business closures as a single type of intervention. There was no  
11  
12 evidence for the separate effect of public transport restriction.  
13  
14  
15

16  
17  
18  
19 (Insert Table 3 here)  
20  
21  
22  
23

24 Many studies showed the combined effects of different social distancing interventions which were  
25 usually implemented as a package with 3-5 measures. Observed impact by an individual measure was  
26 scarcely reported or only demonstrated with modelling. For example, Islam et al. (11) reported that  
27 among 149 countries being studied, 118 countries covered 5 measures while 29 countries used 3 to 4  
28 interventions, with only 1 country introducing 2 measures and the remaining 1 country using a single  
29 measure. In addition, even though the lockdown, in this review, was shown with the highest reduction  
30 in  $R_t$ , it had indeed been used along with multiple measures.  
31  
32  
33  
34  
35  
36  
37  
38  
39  
40  
41

42 Apart from types of interventions, relationship between implementation time points and effect were  
43 investigated. Lam et al. (40); observed an early public health measure promulgation was able to contain  
44 the epidemic in Hong Kong, without initiating extreme measures such as a city-wide lockdown. Other  
45 studies suggested that the effect time variation might be due to the different times and levels of  
46 promulgating the social distancing measures, making the effectiveness apparently different (39). It  
47 could be demonstrated through the comparison between countries showing that the stronger the level  
48 of social distancing, the faster it took to reduce the number of daily confirmed cases (39). Furthermore,  
49 high initial infection incidence due to late implementation of measures would reduce the effectiveness  
50  
51  
52  
53  
54  
55  
56  
57  
58  
59  
60

1  
2  
3 of measures (39). All these results indicated a need of rapid response and stringent measures to win  
4  
5 the battle.  
6  
7  
8  
9

## 10 **Contextual factors**

11  
12  
13 In addition to the types, level and timing of social distancing measures highlighted in this review, the  
14 effectiveness of measures might also be affected by the contextual factors such as compliance, social  
15 belief and cultural factors. Low public compliance may be a key explanation that interventions showed  
16 no sign of flattening its curve. The compliance issue was further supported by Cruz's study (41)  
17 examining that the social distancing index (SDI), a social distancing adoption index used by the  
18 Brazilian government, larger than 55% was needed to reduce the daily death number. Moreover, social  
19 belief such as awareness of disease information might cultivate a sense of self-imposed initiation of  
20 handwashing, wearing protectives, purposely keeping a distance from people and reducing outdoor  
21 activities. Cultural factors may also have the influence on public gatherings, although it was too  
22 complicated for a quantitative evaluation regarding various timings, magnitudes and processes that  
23 have been happening in a region. Cultural factors were firstly studied in Huynh's study (42) illustrating  
24 that countries with higher Uncertainty Avoidance Index (UAI) predicted a smaller proportion of people  
25 gathering in public such as grocery and retail stores, pharmacy stores, recreation areas, public transport  
26 and workplaces whereas countries in the northern European such as Finland, Sweden, and Norway  
27 with lower uncertainty avoidance indices were unlikely to follow with social distancing measures.  
28 Further, Islam's study (11) observed greater case reduction associated with those countries with a  
29 higher GDP per capita, a higher proportion of population aged 65 years or above, and stronger  
30 preparedness for the pandemic in terms of country health security index. Therefore, the cultural  
31 determinants are likely to play an important role in controlling infection behaviour.  
32  
33  
34  
35  
36  
37  
38  
39  
40  
41  
42  
43  
44  
45  
46  
47  
48  
49  
50  
51  
52  
53  
54  
55  
56  
57  
58  
59  
60



### Knowledge gap for future research

Due to the heterogeneity of the outcomes adopted in the studies, it is difficult to render direct comparison of the changes in  $R_t$  and incidence. Consistent inclusion of these outcomes in studies of similar kinds may allow systematic review and meta-analysis in further studies.

Few studies have investigated the effect of closure of entertainment and eatery settings. The SAGE report (23) suggested that the closure of gyms, bars and restaurants were useful since the environmental risks linked to higher probability of touch surfaces, higher aerosol generation and breathing rates due to aerobic activities. Specifically, the risk in bars and pubs was likely to be higher than many other indoor settings due to close proximity of people, long exposure duration, no wearing of face coverings and talking loudly. Some venues were poorly ventilated, especially in winter. In addition, consumption of alcohol impacts on customers' behaviors. More empirical evidence focusing on the dynamic among the environment, customer behaviors and transmission risks would be beneficial.

Some researchers proposed strategies to be proven by empirical evidence. A circuit breaker, proposed in the SAGE report (23), referring to 2-3 week short-time lockdown, could put the epidemic curve back by about 28 days or more. Based on historical evidence from the 1918 flu pandemic, Correia et al. (45) argued that regions taking earlier and aggressive social distancing measures grew faster economically in the post-pandemic period although there were adverse effects on the economy during the pandemic period. Thus, predicting the recovery in an economy or a community based on the effectiveness of each intervention would be a matter of continuing concern.

Fatigue of pandemic prevention was seen everywhere during the course of COVID-19 pandemic which may exacerbate the peaks and resurgence following the relaxation of self-imposed measures and

1  
2  
3 undermine the public acceptance to the advice from authorities. Governments with good risk  
4 communication with the public, hinging on engagement, communication and feedback, would be  
5 essential to help individuals assess and reduce their own risks appropriately. Abel et al. (46) reported  
6 that social distancing might lead to depression and anxiety in some people, which in return have an  
7 impact on social stability. Psychological impacts were not only observed on patients, health care  
8 workers but also on the overall population. However, Kim et al. (47) suggested we should routinely  
9 provide psychological support instead of stopping social distancing measures. Future studies should  
10 explore the long term strategies for risk communication and risk analysis in specific settings to  
11 overcome public fatigue towards social distancing. Response measures should be proportional to the  
12 risk in different settings.  
13  
14  
15  
16  
17  
18  
19  
20  
21  
22  
23  
24  
25  
26  
27  
28  
29

30 Our search period was till 30 September 2020. Vaccine was not yet ready by that time as most countries  
31 started to have mass vaccination programs after December 2020 (48). Reported number of cases per  
32 population was under 2.3% across countries. Including unreported asymptomatic cases, population  
33 immunity should still be insignificant that time. However, this study period may have an advantage to  
34 exclude the confounding effect of population immunity and mass vaccination to social distancing  
35 measures. Future studies may explore whether the effect of social distancing declines as the degree of  
36 population immunity increases.  
37  
38  
39  
40  
41  
42  
43  
44  
45  
46  
47  
48  
49

## 50 **Limitations**

51  
52 Although a lot of information about the measures taken was collected in government websites,  
53 measures being used in small localities or regional areas were not widely publicized or difficult to  
54 access, resulting in relevant studies being very limited. Moreover, there was a wide variation of testing  
55 accessibility and the criteria for who should be tested in different countries. Similarly, the points of  
56  
57  
58  
59  
60

1  
2  
3 time of promulgation and severity level of interventions are different among countries. Therefore, the  
4  
5 cumulative confirmed cases might not reflect the actual situation of population and were not accurate  
6  
7 for comparisons. Using a time series analysis referencing to the date of death but not to the date of  
8  
9 testing done will be under a possible variation of case reporting and might hinder the decision making  
10  
11 process as long as 15-days delay in some countries. Another concern is that some studies used mobile  
12  
13 device for people attendance changes in specific times and locations. The drawback was the unknown  
14  
15 characteristics of those persons using mobile devices such as age and gender. The data only tracked  
16  
17 mobile devices but not persons, who might have multiple devices (e.g., a phone and a tablet), or might  
18  
19 not take their devices when they leave home. Hence, the results might not reflect the actual mobility  
20  
21 patterns. Finally, our review excluded non-English literature. The English literature of COVID-19  
22  
23 might be biased towards countries with good research capacity and interests in publishing their  
24  
25 findings for international audience.  
26  
27  
28  
29  
30  
31  
32  
33

## 34 **Conclusions**

35  
36 Our review showed that the outcomes of social distancing measures were mainly measured by changes  
37  
38 in  $R_t$ , incidence and mortality. There was empirical evidence for the effect of social distancing between  
39  
40 individuals, and for partial or full lockdown. However, the evidence was moderate for the separate  
41  
42 effect of school closure, and limited for workplace/business closures. There was no evidence for the  
43  
44 separate effect of public transport restriction. In the community setting, there was more evidence on  
45  
46 the combined effect of different social distancing interventions than for a single one. Apart from the  
47  
48 effectiveness of the interventions, public compliance is another important issue. COVID-19 has been  
49  
50 changing our lives and a new norm may emerge as we have to live with new variants of the virus,  
51  
52 which may develop to a situation similar to that of the seasonal flu, where a total elimination is not the  
53  
54 goal. Fatigue of preventive behaviors is on the top of the public health agenda. Community compliance  
55  
56 with social distancing measures is related to the population's attitude to government policies, the  
57  
58  
59  
60

1  
2  
3 access/awareness of trustful sources of information, the initiations and maintenance to self-imposed  
4 measures. Therefore, risk communication and risk analysis continue to be the cornerstone of public  
5 health measures and need to be in conjunction with addressing the research gap for implementing  
6 effective measures which are targeted and proportionate to the risk in different settings.  
7  
8  
9  
10  
11  
12  
13  
14  
15

## 16 **Figure:**

17 Figure 1. PRISMA flow diagram of literature search and selection  
18  
19

## 20 **Contributors**

21 EKY designed the study, applied for the grant and made major contributions to writing the manuscript.  
22 VCHC, EKY, KSS and CTH managed the review methodology. TSML, KSS and YSL conducted the  
23 review and data synthesis. TSML, KSS, EKY, CHKY and CTH wrote the first draft of the manuscript.  
24 All authors read, revised and approved the final manuscript.  
25  
26  
27  
28  
29

## 30 **Funding**

31 This study was funded by Commissioned Research on the Novel Coronavirus Disease (Ref.:  
32 COVID190105) of the Health and Medical Research Fund, Food and Health Bureau, Hong Kong SAR  
33 Government. The funder had no role in the study design, collection, analysis, and interpretation of  
34 data, or in writing the manuscript.  
35  
36  
37  
38  
39

## 40 **Competing interests**

41 The authors declare that they have no competing interests.  
42  
43

## 44 **Ethics approval**

45 Ethical approval was obtained from the Survey and Behavioural Research Ethics Committee of the  
46 Chinese University of Hong Kong (Ref no. SBRE-19-595).  
47  
48  
49

## 50 **Consent for publication**

51 Not applicable.  
52  
53  
54

## 55 **Data sharing statement**

56 The datasets used and/or analyzed during the current study are available from the corresponding author  
57 on reasonable request.  
58  
59  
60

**Table 1 Article characteristics (n=34)**

|                                               |                         | Count (%) |
|-----------------------------------------------|-------------------------|-----------|
| <b>Countries/ cities by geographic region</b> |                         |           |
|                                               | Asia                    | 13 (27.7) |
|                                               | Australia & New Zealand | 2 (4.3)   |
|                                               | Europe                  | 12 (25.5) |
|                                               | North America           | 14 (29.8) |
|                                               | South America           | 3 (6.4)   |
|                                               | Global studies          | 3 (6.4)   |
| <b>Country economy<sup>#</sup></b>            |                         |           |
|                                               | High income             | 33 (63.5) |
|                                               | Middle income           | 16 (30.8) |
|                                               | Low income              | 3 (5.8)   |
| <b>Article type</b>                           |                         |           |
|                                               | Research article        | 38 (92.7) |
|                                               | Review article          | 3 (7.3)   |

<sup>#</sup>Country economy level according to The World Bank's classification.

**Table 2 Effectiveness and outcomes of social distancing measures**

| Article and Study Characteristics                                                                                                           |                                      | Type of Social Distancing Measures    |                                                    |                                                                                              |                              |                                             |        | Effectiveness Indicators                                                                                                                                                                                                                                                                                                                                                                                                                               |
|---------------------------------------------------------------------------------------------------------------------------------------------|--------------------------------------|---------------------------------------|----------------------------------------------------|----------------------------------------------------------------------------------------------|------------------------------|---------------------------------------------|--------|--------------------------------------------------------------------------------------------------------------------------------------------------------------------------------------------------------------------------------------------------------------------------------------------------------------------------------------------------------------------------------------------------------------------------------------------------------|
| Authors; article type; study period/publication date; study design                                                                          | Country/region; economy level        | Social distancing between individuals | School measure / closure                           | Workplace measure / closure                                                                  | Public transport restriction | Stay-at-home recommendation / ordinances    | Others | <b>Infectivity:</b> Rt, effective reduction number<br><b>Incidence:</b> incidence, incidence rate, attack rate, bed occupancy rate<br><b>Mortality:</b> Mortality or fatality rate<br><b>Effect time:</b> Action and effect duration, time of reaching peak<br><b>Attendance:</b> Attendance % of location, daily vehicles miles, daily contact frequency, mobility of leaving home, travel distance                                                   |
| Auger et al.(25)<br>Research Article;<br>9/3/2020-7/5/2020;<br>Population-based observational study of changes in incidence and mortality   | The US;<br>High                      |                                       | Statewide closure of primary and secondary schools |                                                                                              |                              |                                             |        | <b>(Incidence &amp; mortality):</b> Primary and secondary school closure in the US between March and May 2020 was associated with decreased COVID-19 incidence (adjusted relative change per week, -62%) and mortality (-58%). States that closed schools earlier, when cumulative incidence of COVID-19 was low, had the largest relative reduction in incidence and mortality, although there might be confounding effects from other interventions. |
| Brauner et al. (18).<br>Research Article;<br>22/1/2020-30/5/2020;<br>Modelling study based on national case and death counts                | Members of the EU countries;<br>High | Limiting size of gathering            |                                                    | Closing most of non-essential businesses and high risk businesses, e.g. bars and restaurants |                              |                                             |        | <b>(Infectivity):</b> 41 countries-pooled data showed Rt reduction of 36% when gatherings were limited to 10 people or below; 28% when 100 or below and 13% when 1,000 or below. A 29% Rt reduction came with closing most of non-essential businesses while 20% was found when closing high risk businesses, e.g. bars and restaurants.                                                                                                               |
| Castaneda-Babarro et al. (49);<br>Research article;<br>23/3/2020-1/4/2020;<br>Cross-sectional survey on 800 general public for walking time | Spain;<br>High                       | ✓                                     | Forced e-learning                                  |                                                                                              | Restricted travel            | Country lockdown with stay-at-home measures |        | <b>(Attendance):</b> Self-reported walking time decreased by 58.2% during confinement.                                                                                                                                                                                                                                                                                                                                                                 |
| Clipman et al. (21);<br>Research article;<br>17-28/6/2020                                                                                   | Maryland, the US;<br>High            | ✓                                     |                                                    |                                                                                              |                              |                                             |        | <b>(Incidence):</b> Multivariable analysis found that history of SARS-CoV-2 infection was significantly less common among those who always practiced social distancing (aOR for                                                                                                                                                                                                                                                                        |

| Article and Study Characteristics                                                                     |                                | Type of Social Distancing Measures                      |                          |                                                                  |                                                        |                                          |                        | Effectiveness Indicators                                                                                                                                                                                                                                                                                                                                                                                                                                                             |
|-------------------------------------------------------------------------------------------------------|--------------------------------|---------------------------------------------------------|--------------------------|------------------------------------------------------------------|--------------------------------------------------------|------------------------------------------|------------------------|--------------------------------------------------------------------------------------------------------------------------------------------------------------------------------------------------------------------------------------------------------------------------------------------------------------------------------------------------------------------------------------------------------------------------------------------------------------------------------------|
| Authors; article type; study period/ publication date; study design                                   | Country/ region; economy level | Social distancing between individuals                   | School measure / closure | Workplace measure / closure                                      | Public transport restriction                           | Stay-at-home recommendation / ordinances | Others                 | <b>Infectivity:</b> Rt, effective reduction number<br><b>Incidence:</b> incidence, incidence rate, attack rate, bed occupancy rate<br><b>Mortality:</b> Mortality or fatality rate<br><b>Effect time:</b> Action and effect duration, time of reaching peak<br><b>Attendance:</b> Attendance % of location, daily vehicles miles, daily contact frequency, mobility of leaving home, travel distance                                                                                 |
| Cross-sectional survey on 1,030 general public for infection history and social distancing behaviors  |                                |                                                         |                          |                                                                  |                                                        |                                          |                        | indoor social distancing, 0.32 [95% CI, .10–.99]; aOR for outdoor social distancing, 0.10 [95% CI, .03–.33].                                                                                                                                                                                                                                                                                                                                                                         |
| Cruz (41);<br>Research article;<br>15/3 to 5/4/2020;<br>Time series analysis of death counts          | São Paulo City, Brazil; Middle | ✓                                                       | Mandatory closure        | Work-from-home and mandatory closure of non-essential businesses |                                                        |                                          |                        | <b>(Mortality):</b> Correlating daily death number with Social Distancing Index (SDI) was derived from government websites. SDI was between 52% and 56%, crossing the break-even point of death number (from 0.82 to -0.4). SDI larger than 55% is needed to reduce death number.                                                                                                                                                                                                    |
| Courtemanche et al. (38)<br>Research article;<br>1/3 – 27/4/2020;<br>Analysis of growth rate of cases | The US; High                   | Ban on large social gathering with a limit of 50 people | Public school closure    | Closing entertainment businesses                                 |                                                        | Shelter-in-place order (last policy)     |                        | <b>(Incidence):</b> Growth rate of daily confirmed cases reduced by 5.4% after 1-5 days, 6.8% after 6-10 days, 8.2% after 11-15 days, 9.1% after 16-20 days. The number of confirmed cases was 10 times greater without shelter-in-place order and 35 times greater without 4 types of social distancing measures.                                                                                                                                                                   |
| Du et al.(32);<br>Research article;<br>1/1 - 15/2/2020;<br>Analysis of case data from online reports  | 58 cities of China; Middle     | Ban on public gathering                                 | ✓                        | Closing shopping malls, restaurants and entertainment businesses | Suspension of intracity and intercity public transport | ✓                                        | Testing                | <b>(Infectivity):</b> Rt declined by an average of 54.3% (+/- 17.6%) during the containment period.<br><b>(Effect time):</b> The mean time until successful containment was 21 days after the 1st reported case and 8 days following the initiation of interventions. During the period of containment, the R <sub>t</sub> declined by an average of 54.3%. A delay of 1 day in implementing the 1st intervention is expected to prolong an outbreak by 2.41 days (95% CI 0.96–3.86) |
| Ehrhardt et al.(28);<br>Research Letter;                                                              | Germany; High                  |                                                         | 50% class size           |                                                                  |                                                        |                                          | Enhance ventilation of | <b>(Incidence):</b> The infection for children aged 0-19 was 3.3% among all settings,                                                                                                                                                                                                                                                                                                                                                                                                |

| Article and Study Characteristics                                                                                                    |                                | Type of Social Distancing Measures    |                                                                                                                                                      |                             |                              |                                          |                                                                                                                                                                                                                | Effectiveness Indicators                                                                                                                                                                                                                                                                                                                                                                             |
|--------------------------------------------------------------------------------------------------------------------------------------|--------------------------------|---------------------------------------|------------------------------------------------------------------------------------------------------------------------------------------------------|-----------------------------|------------------------------|------------------------------------------|----------------------------------------------------------------------------------------------------------------------------------------------------------------------------------------------------------------|------------------------------------------------------------------------------------------------------------------------------------------------------------------------------------------------------------------------------------------------------------------------------------------------------------------------------------------------------------------------------------------------------|
| Authors; article type; study period/ publication date; study design                                                                  | Country/ region; economy level | Social distancing between individuals | School measure / closure                                                                                                                             | Workplace measure / closure | Public transport restriction | Stay-at-home recommendation / ordinances | Others                                                                                                                                                                                                         | <b>Infectivity:</b> Rt, effective reduction number<br><b>Incidence:</b> incidence, incidence rate, attack rate, bed occupancy rate<br><b>Mortality:</b> Mortality or fatality rate<br><b>Effect time:</b> Action and effect duration, time of reaching peak<br><b>Attendance:</b> Attendance % of location, daily vehicles miles, daily contact frequency, mobility of leaving home, travel distance |
| 25/5/20-25/8/20 Analysis of COVID-19 cases aged 0–19 years who attended schools / childcare facilities                               |                                |                                       | reduction, cancelling physical education lesson, physical distancing between children                                                                |                             |                              |                                          | rooms, policy for sick students to stay at home, facemask wearing, suspension of singing or use of wind instruments during music lesson, promoting hand hygiene, cough etiquette, cleaning of contact surfaces | suggesting child-to-child transmission in schools and childcare facilities was uncommon and not the primary cause of SARS-CoV-2 infection in children. It might be partially due to the infection control measures initiated after school/child-care-facility reopening.                                                                                                                             |
| Otte et al.(27); Research Letter; 28/1/20 – 31/8/20 Analysis of COVID-19 data on school outbreaks using national surveillance system | Germany; High                  |                                       | Opening school for specific grades, staggering timetables, alternating between remote and on-site teaching, restricting class size, keeping distance |                             |                              |                                          | Policies for sick students and staff to stay home, enhanced hand hygiene, wearing face masks, ventilation of rooms, respiratory etiquette                                                                      | <b>(Incidence):</b> The average number of outbreaks and of cases per outbreak was smaller after reopening of schools (2.2 outbreaks/week and 4 cases/ outbreak) than before school closure (3.3 outbreaks/week and 6 cases/outbreak).                                                                                                                                                                |



| Article and Study Characteristics                                                                             |                                | Type of Social Distancing Measures                                                                                                                  |                          |                                                  |                              |                                          |                                  | Effectiveness Indicators                                                                                                                                                                                                                                                                                                                                                                                                                                                                                                                                                                                |
|---------------------------------------------------------------------------------------------------------------|--------------------------------|-----------------------------------------------------------------------------------------------------------------------------------------------------|--------------------------|--------------------------------------------------|------------------------------|------------------------------------------|----------------------------------|---------------------------------------------------------------------------------------------------------------------------------------------------------------------------------------------------------------------------------------------------------------------------------------------------------------------------------------------------------------------------------------------------------------------------------------------------------------------------------------------------------------------------------------------------------------------------------------------------------|
| Authors; article type; study period/ publication date; study design                                           | Country/ region; economy level | Social distancing between individuals                                                                                                               | School measure / closure | Workplace measure / closure                      | Public transport restriction | Stay-at-home recommendation / ordinances | Others                           | <b>Infectivity:</b> Rt, effective reduction number<br><b>Incidence:</b> incidence, incidence rate, attack rate, bed occupancy rate<br><b>Mortality:</b> Mortality or fatality rate<br><b>Effect time:</b> Action and effect duration, time of reaching peak<br><b>Attendance:</b> Attendance % of location, daily vehicles miles, daily contact frequency, mobility of leaving home, travel distance                                                                                                                                                                                                    |
|                                                                                                               |                                |                                                                                                                                                     | between students         |                                                  |                              |                                          |                                  |                                                                                                                                                                                                                                                                                                                                                                                                                                                                                                                                                                                                         |
| Huynh (42); Research article; 16/2 - 29/3/2020; Analysis of data from community mobility reports              | 58 countries; Low to high      | Social distancing in:<br>1.retail and recreation<br>2.grocery and pharmacy<br>3.parks<br>4. transit stations<br>5.workplaces<br>6.residential areas |                          |                                                  |                              |                                          |                                  | <b>(Attendance):</b> Attendance in percentage change of specific locations was reported. Countries with higher Uncertainty Avoidance Index (UAI) predicted lower proportion of people gathering in public such as retail and recreation, grocery and pharmacy, parks, transit stations, workplaces. Northern Europe (Finland, Sweden & Norway) with lower UAI was unlikely to commit to social distancing. The cultural determinants played an important role in controlling infection behaviour.                                                                                                       |
| Islam et al. (11); Research article; 1/1– 30/5/2020; Natural experiment with interrupted time series analysis | 149 countries; Low to High     | Restriction of mass gathering and public events                                                                                                     | School closure           | Workplace closure                                | Public transport closure     | Movement Lockdown                        |                                  | <b>(Incidence):</b> Overall, with any intervention, there was 13% reduction in incidence. Data suggested similar effectiveness when school closures, workplace closures, and restrictions on mass gatherings were in place. Earlier lockdown was associated with a larger reduction compared with a delay after other interventions were in place. A combination of 4 measures including restrictions on mass gatherings, school closures, workplace closures, and lockdowns in 32 countries was associated with decreasing incidence of COVID-19 (pooled incident rate ratio, IRR 0.87, 0.84 to 0.91). |
| Jarvis et al.; (50) Research article; 24/3-27/3/2020; Cohort survey on 1356 general public                    | The UK; High                   |                                                                                                                                                     | School closure           | Limiting time at work, having work closed and/or |                              |                                          | Quarantine and isolation isolate | <b>(Attendance):</b> A 74% reduction in the average daily number of contacts was observed per participant (from 10.8 to 2.8). It was expected to be sufficient to reduce R0 from 2.6 before the lockdown to                                                                                                                                                                                                                                                                                                                                                                                             |

| Article and Study Characteristics                                                                                            |                                                                                     | Type of Social Distancing Measures    |                          |                                                  |                                                                                                              |                                          |                                                               | Effectiveness Indicators                                                                                                                                                                                                                                                                                                                                                                                                                                                     |
|------------------------------------------------------------------------------------------------------------------------------|-------------------------------------------------------------------------------------|---------------------------------------|--------------------------|--------------------------------------------------|--------------------------------------------------------------------------------------------------------------|------------------------------------------|---------------------------------------------------------------|------------------------------------------------------------------------------------------------------------------------------------------------------------------------------------------------------------------------------------------------------------------------------------------------------------------------------------------------------------------------------------------------------------------------------------------------------------------------------|
| Authors; article type; study period/ publication date; study design                                                          | Country/ region; economy level                                                      | Social distancing between individuals | School measure / closure | Workplace measure / closure                      | Public transport restriction                                                                                 | Stay-at-home recommendation / ordinances | Others                                                        | <b>Infectivity:</b> Rt, effective reduction number<br><b>Incidence:</b> incidence, incidence rate, attack rate, bed occupancy rate<br><b>Mortality:</b> Mortality or fatality rate<br><b>Effect time:</b> Action and effect duration, time of reaching peak<br><b>Attendance:</b> Attendance % of location, daily vehicles miles, daily contact frequency, mobility of leaving home, travel distance                                                                         |
| to report daily number of contacts                                                                                           |                                                                                     |                                       |                          | not visiting work                                |                                                                                                              |                                          |                                                               | 0.62 (95% confidence interval [CI] 0.37–0.89) after the lockdown, based on all types of contact and 0.37 (95% CI = 0.22–0.53) for physical contacts only.                                                                                                                                                                                                                                                                                                                    |
| Lemaitre et al.(22)<br>Research Article;<br>24/2/2020-24/4/2020<br>Modelling study using data on hospitalizations and deaths | Switzerland; High                                                                   | Ban on gathering                      | School closure           | Closure of nonessential activities               |                                                                                                              |                                          |                                                               | <b>(Infectivity):</b> Strong support for changes in R0 following the mobility decline which happened before school closure (national-level mean probability across activities 0.70, cantonal range 0.55–0.99),<br><br>High correlation between changes in R0 and changes in mobility was found, with the strongest associations shown in mobility to work, transit stations, retail and recreation, and residential (cross-correlations >0.9 in all cantons and nationally). |
| Juni et al.(51);<br>Research article;<br>7– 13/3/2020;<br>Prospective cohort study for incidence                             | 144 countries; Low to High                                                          | Gathering of any size                 | ✓                        | Closing restaurants, bars, or non-grocery stores |                                                                                                              |                                          |                                                               | <b>(Incidence):</b> A rate ratio comparing the cumulative count of confirmed COVID-19 cases with that of previous week was reported. There was strong association of epidemic growth with mass gathering (RRR 0.65, 95% CI 0.53-0.79), school closure (RRR 0.63, 95% CI 0.57-0.78), business closure (RRR 0.62, 95% CI 0.45-0.85).                                                                                                                                           |
| Khanna et al.(52);<br>Review;<br>Published on 10 April 2020;                                                                 | China, HK, Singapore, South Korea, US, Italy, Spain, Iran and India; Middle to High |                                       |                          |                                                  | All transports in and out of Hubei were prohibited, with each citizen being allowed to go out for 30 minutes | 3-week lockdown in Hubei                 | Quarantine of mild and asymptomatic cases for China Travelers | <b>(Infectivity):</b> China Rt reduced from 2.35 to 1.05 during the period of 16/1/2020–30/1/2020.<br><b>(Effect time):</b> China slowed the dispersal of infection to other cities by 2.91 days and increased the doubling time from 2 to 4 days.<br>Other Chinese cities implementing preventive control measures earlier were reported 33.3% fewer cases in the first week                                                                                                |

| Article and Study Characteristics                                                                                                                                                 |                                | Type of Social Distancing Measures                                 |                                 |                             |                              |                                          |                                                                                                                              | Effectiveness Indicators                                                                                                                                                                                                                                                                                                                                                                             |
|-----------------------------------------------------------------------------------------------------------------------------------------------------------------------------------|--------------------------------|--------------------------------------------------------------------|---------------------------------|-----------------------------|------------------------------|------------------------------------------|------------------------------------------------------------------------------------------------------------------------------|------------------------------------------------------------------------------------------------------------------------------------------------------------------------------------------------------------------------------------------------------------------------------------------------------------------------------------------------------------------------------------------------------|
| Authors; article type; study period/ publication date; study design                                                                                                               | Country/ region; economy level | Social distancing between individuals                              | School measure / closure        | Workplace measure / closure | Public transport restriction | Stay-at-home recommendation / ordinances | Others                                                                                                                       | <b>Infectivity:</b> Rt, effective reduction number<br><b>Incidence:</b> incidence, incidence rate, attack rate, bed occupancy rate<br><b>Mortality:</b> Mortality or fatality rate<br><b>Effect time:</b> Action and effect duration, time of reaching peak<br><b>Attendance:</b> Attendance % of location, daily vehicles miles, daily contact frequency, mobility of leaving home, travel distance |
|                                                                                                                                                                                   |                                |                                                                    |                                 |                             | every two days               |                                          |                                                                                                                              | of their outbreaks compared with that of cities starting the control later.                                                                                                                                                                                                                                                                                                                          |
| Koh, et al. (37); Research report; 1/1/2020-28/5/2020<br>Analysis of effect of measures indicated by Rt                                                                           | 142 countries; Low to High     | Cancellation of public events, restrictions on size of gatherings, | ✓                               | Closure of workplace        | Closures of public transport | Stay-at-home order                       | Restrictions on internal movements/ international travel                                                                     | <b>(Infectivity):</b> Following the 100 <sup>th</sup> case, it was found effective that complete travel bans and all forms of lockdown-type measures reduced average Rt over the 14 days. Stay-at-home recommendation and partial lockdowns were as effective as complete lockdowns when controlling the outbreaks. However, these measures were effective when it could be implemented early.       |
| Macartney et al.(29); Research Article; 25/1/20-10/4/20.<br>Analysis of confirmed cases in children and staff who attended schools or early childhood education and care settings | Australia; High                |                                                                    | Reduced face-to-face attendance |                             |                              |                                          |                                                                                                                              | <b>(Incidence):</b> Although the attack rate of secondary cases was 0.5% in schools, it was unable to assess the effect on transmission regarding hygiene or physical distancing used in educational settings                                                                                                                                                                                        |
| Lai et al. (44); Research article; 23/1 – 1/3/2020; Epidemiological study analyzing government information of the confirmed cases                                                 | Hong Kong; High                |                                                                    | ✓                               | Work from home              |                              |                                          | Border Control<br>• Phases 1-3: (18/1-7/2)<br>• Phase 4: (8-29/2)<br><br>Mandatory quarantine for China travelers in phase 4 | <b>(Infectivity):</b> Median Rt dropped from 1.07 to 0.75 with border control in phase 4 (8–29/2/2020).                                                                                                                                                                                                                                                                                              |

| Article and Study Characteristics                                                                                                                                                                                             |                                                                                       | Type of Social Distancing Measures    |                                   |                                                   |                                                                  |                                             |                                                                               | Effectiveness Indicators                                                                                                                                                                                                                                                                                                                                                                                                                                                                                                                                                                                                                      |
|-------------------------------------------------------------------------------------------------------------------------------------------------------------------------------------------------------------------------------|---------------------------------------------------------------------------------------|---------------------------------------|-----------------------------------|---------------------------------------------------|------------------------------------------------------------------|---------------------------------------------|-------------------------------------------------------------------------------|-----------------------------------------------------------------------------------------------------------------------------------------------------------------------------------------------------------------------------------------------------------------------------------------------------------------------------------------------------------------------------------------------------------------------------------------------------------------------------------------------------------------------------------------------------------------------------------------------------------------------------------------------|
| Authors; article type; study period/ publication date; study design                                                                                                                                                           | Country/ region; economy level                                                        | Social distancing between individuals | School measure / closure          | Workplace measure / closure                       | Public transport restriction                                     | Stay-at-home recommendation / ordinances    | Others                                                                        | <b>Infectivity:</b> Rt, effective reduction number<br><b>Incidence:</b> incidence, incidence rate, attack rate, bed occupancy rate<br><b>Mortality:</b> Mortality or fatality rate<br><b>Effect time:</b> Action and effect duration, time of reaching peak<br><b>Attendance:</b> Attendance % of location, daily vehicles miles, daily contact frequency, mobility of leaving home, travel distance                                                                                                                                                                                                                                          |
| Lam et al.(40); Research article; 1/1 – 31/5/2020; Epidemiological study analyzing the changes in daily number of confirmed cases                                                                                             | Hong Kong; High                                                                       | Cancellation of large scale events    | School suspension from phases 1-4 | Work from home for civil servants in phases 1 & 2 |                                                                  |                                             | Entry restriction / quarantine for inbound travelers and asymptomatic testing | <b>(Mortality):</b> Case fatality ratio (0.4%) was much lower than global ones during the same period in WHO (6.1%).                                                                                                                                                                                                                                                                                                                                                                                                                                                                                                                          |
| Lasry et al.(53); Research article; 26/2 – 1/4/2020 Descriptive analysis using types and timing of mitigation interventions, cumulative number of reported cases, percentage change in confirmed cases and community mobility | 4 US metropolitan areas: San Francisco, Seattle; New Orleans, and New York City; High | Ban on gathering of certain size      | School closure                    | Restrictions on businesses                        |                                                                  | Stay-at-home orders (last policy)           | States of Emergency (1 <sup>st</sup> policy)                                  | <b>(Attendance):</b> Mobility of leaving home was reported. In four localities, the percentage leaving home was close to 80% on February 26, and decreased to 42% in New York City, 47% in San Francisco, 52% in Seattle, and 61% in New Orleans on April 1. Mobility did not decline following the state of emergency alone but a combination of policies such as gathering restrictions or school closures and further decreased after stay-at-home orders.<br><br><b>(Incidence):</b> 3-day average percentage change in cumulative case count showed a decreasing trend by the last 2 weeks of March after a set of policies implemented. |
| Lino et al. (5); Research article; 1-31/5/2020 Observational study on bed occupation rates in a hospital following lockdown                                                                                                   | Fortaleza (state capital city), Ceará, Brazil; Middle                                 | ✓                                     |                                   | Suspension of commercial activities               | Restricted daytime movements and interruption of intercity trips | City lockdown, night curfews                |                                                                               | <b>(Incidence)</b> Bed occupancy rates in a tertiary hospital for referred COVID-19 cases were higher than 100% before the lockdown and reached nearly 140% 2 days after. The rate decreased to below 100% 14 days after the lockdown (viral incubation period), and dropped to about 85% 23 days after the lockdown onset.                                                                                                                                                                                                                                                                                                                   |
| Lim et al. (35); Research Article; 15/2/20-9/5/20.                                                                                                                                                                            | 9 Southeast countries including                                                       | No social gathering or                | Close schools                     | Close of non-essential business,                  | No or limited capacity of public                                 | Stay-at-home order, curfew from 10pm to 4am | Broader closure, mandatory                                                    | <b>(Incidence):</b> Average daily incidence declined gradually for all countries except the Philippines and Laos.                                                                                                                                                                                                                                                                                                                                                                                                                                                                                                                             |

| Article and Study Characteristics                                                                                                                             |                                                                                                                 | Type of Social Distancing Measures                         |                           |                                                                                  |                                                                                |                                                |                                                                    | Effectiveness Indicators                                                                                                                                                                                                                                                                                                                                                                                                                     |
|---------------------------------------------------------------------------------------------------------------------------------------------------------------|-----------------------------------------------------------------------------------------------------------------|------------------------------------------------------------|---------------------------|----------------------------------------------------------------------------------|--------------------------------------------------------------------------------|------------------------------------------------|--------------------------------------------------------------------|----------------------------------------------------------------------------------------------------------------------------------------------------------------------------------------------------------------------------------------------------------------------------------------------------------------------------------------------------------------------------------------------------------------------------------------------|
| Authors; article type; study period/ publication date; study design                                                                                           | Country/ region; economy level                                                                                  | Social distancing between individuals                      | School measure / closure  | Workplace measure / closure                                                      | Public transport restriction                                                   | Stay-at-home recommendation / ordinances       | Others                                                             | <b>Infectivity:</b> Rt, effective reduction number<br><b>Incidence:</b> incidence, incidence rate, attack rate, bed occupancy rate<br><b>Mortality:</b> Mortality or fatality rate<br><b>Effect time:</b> Action and effect duration, time of reaching peak<br><b>Attendance:</b> Attendance % of location, daily vehicles miles, daily contact frequency, mobility of leaving home, travel distance                                         |
| Analysis of COVID-19 case counts from each Southeast Asian country collected from open web source                                                             | Cambodia, Indonesia, Laos, Malaysia, Myanmar, the Philippines, Singapore, Thailand and Viet Nam; Middle to High | with people limit, 1-2 m physical distance in public place |                           | work from home                                                                   | transport, healthcare declaration forms required, no interstate transportation |                                                | masking in public place                                            | <b>(Infectivity):</b> A large variation in Rt reduction, with the biggest decrease in Malaysia from 3.68 (95% CrI 3.47–3.91) to 1.53 (1.44–1.61) and the smallest decrease in Laos from 1.55 (1.04–2.08) to 1.20 (0.84–1.56).                                                                                                                                                                                                                |
| Marschner (36); Research article; 25/1 – 8/5/2020<br>Back-projection study analyzing the probability distribution of the time between infection and diagnosis | Australia; High                                                                                                 | Stage 2: limiting gathering of 2 people (26-31 March)      |                           | Stage 1: prohibited face-to-face meeting and entertainment activities (23 March) |                                                                                | Stage 3: prohibited leaving home (26-31 March) | Border control (20 March)                                          | <b>(Effect time):</b> It was estimated that one week delay in control measures would lead to an almost fivefold increase in total infections but one week earlier control would reduce total infections of similar magnitude.                                                                                                                                                                                                                |
| Munayco et al.(54); Research article; 23/1– 9/5/2020<br>Modelling study using the daily number of confirmed cases by date of symptoms onset                   | Peru; Middle                                                                                                    | Ban on gathering of larger than 300 people on 12 March     | School measure since 11/3 |                                                                                  |                                                                                |                                                | Closing country border, National Emergency Declaration on 16 March | <b>(Incidence):</b> Before the implementation of social distancing measures in Lima, the mean scaling of growth parameter, p, was estimated at 0.9 and the reproduction number at 2.3. School closures and other social distancing interventions slowed down the spread of the novel coronavirus, shifting the exponential growth trend to an approximately linear growth trend, with the scaling of growth parameter being reduced to 0.53. |

| Article and Study Characteristics                                                                                                                                                        |                                | Type of Social Distancing Measures    |                                                                                      |                                                                                     |                              |                                          |                                                                       | Effectiveness Indicators                                                                                                                                                                                                                                                                                                                                                                             |
|------------------------------------------------------------------------------------------------------------------------------------------------------------------------------------------|--------------------------------|---------------------------------------|--------------------------------------------------------------------------------------|-------------------------------------------------------------------------------------|------------------------------|------------------------------------------|-----------------------------------------------------------------------|------------------------------------------------------------------------------------------------------------------------------------------------------------------------------------------------------------------------------------------------------------------------------------------------------------------------------------------------------------------------------------------------------|
| Authors; article type; study period/ publication date; study design                                                                                                                      | Country/ region; economy level | Social distancing between individuals | School measure / closure                                                             | Workplace measure / closure                                                         | Public transport restriction | Stay-at-home recommendation / ordinances | Others                                                                | <b>Infectivity:</b> Rt, effective reduction number<br><b>Incidence:</b> incidence, incidence rate, attack rate, bed occupancy rate<br><b>Mortality:</b> Mortality or fatality rate<br><b>Effect time:</b> Action and effect duration, time of reaching peak<br><b>Attendance:</b> Attendance % of location, daily vehicles miles, daily contact frequency, mobility of leaving home, travel distance |
| Pan et al.(34); Research article; 8/12/2019–8/3/2020 Cohort study on data of 32 583 patients                                                                                             | China Wuhan; Middle            | Social distancing                     |                                                                                      |                                                                                     | Traffic restriction          | Cordons sanitaire                        | Universal symptom survey, home and centralized quarantine             | <b>(Infectivity):</b> A reduction of Rt from larger than 3 in January to less than 1.0 on February 6 and then less than 0.3 in March after implementation of measures by different phases.                                                                                                                                                                                                           |
| Patel P et al.(55); Research article; 30/1– 4/5/2020 Epidemiology study using the growth rate of confirmed cases                                                                         | India; Middle                  | ✓                                     | ✓                                                                                    | ✓                                                                                   |                              | Lockdown since 25 March                  | progressive travel restriction, health promotion and enhanced testing | <b>(infectivity):</b> A decline in Rt following NPIs implementation was observed, with a reduction from 2.51to 1.83 at the end of lockdown phase. Although the sub-exponential growth confirmed mitigation of epidemic, Rt larger than 1 still indicated ongoing disease transmission.                                                                                                               |
| Randhawa et al.(30); Research letter; 1/3/20-16/4/20. Analysis of the positivity rates for SARS-CoV-2 in outpatient settings In Washington State and in emergency departments in Seattle | The US High                    | Statewide gathering limits            |                                                                                      | Statewide shut down of bars and restaurants                                         |                              | Washington State’s stay-home order       |                                                                       | <b>(Incidence):</b> The positivity rate was 17.6% in the outpatient clinics and 14.3% in emergency departments at the peak period and 3.8% and 9.8%, respectively, at the end of the analysis period.                                                                                                                                                                                                |
| Rivkees et al. (24); Brief report; 1/3/2020-31/5/2020                                                                                                                                    | Florida, US High               | ✓                                     | Closures of elementary schools, high schools, and universities for in-person classes | Restricted access to bars and restaurants, limited commerce to essential businesses | ✓                            | Statewide stay-at-home order             |                                                                       | <b>(Attendance)</b> Assessment of movement within the state using Google mobility and Unacast mobility analytics based on cell phone data showed that closing schools resulted in a 40-55% reduction in average distance traveled compared with pre-outbreak levels. The stay-at-home order was associated with a further reduction in                                                               |



| Article and Study Characteristics                                                                                |                                  | Type of Social Distancing Measures                                    |                          |                                                                    |                                                                |                                          |                                  | Effectiveness Indicators                                                                                                                                                                                                                                                                                                                                                                                                                        |
|------------------------------------------------------------------------------------------------------------------|----------------------------------|-----------------------------------------------------------------------|--------------------------|--------------------------------------------------------------------|----------------------------------------------------------------|------------------------------------------|----------------------------------|-------------------------------------------------------------------------------------------------------------------------------------------------------------------------------------------------------------------------------------------------------------------------------------------------------------------------------------------------------------------------------------------------------------------------------------------------|
| Authors; article type; study period/ publication date; study design                                              | Country/ region; economy level   | Social distancing between individuals                                 | School measure / closure | Workplace measure / closure                                        | Public transport restriction                                   | Stay-at-home recommendation / ordinances | Others                           | <b>Infectivity:</b> Rt, effective reduction number<br><b>Incidence:</b> incidence, incidence rate, attack rate, bed occupancy rate<br><b>Mortality:</b> Mortality or fatality rate<br><b>Effect time:</b> Action and effect duration, time of reaching peak<br><b>Attendance:</b> Attendance % of location, daily vehicles miles, daily contact frequency, mobility of leaving home, travel distance                                            |
|                                                                                                                  |                                  |                                                                       |                          |                                                                    |                                                                |                                          |                                  | average distance traveled. During the period under stay-at-home order, the density of in-person encounters fell by 74-82%, visits to nonessential venues by 55%, and overall distance traveled by 45%. Average distance traveled within the state decreased by 25-40%.                                                                                                                                                                          |
| Rubin et al. (20)<br>Research Article;<br>25/2/2020- 23/4/2020<br>Cohort study using publicly de-identified data | The US;<br>High                  | ✓                                                                     |                          | Reduce visits to nonessential businesses                           |                                                                |                                          |                                  | <b>(Infectivity):</b> In multivariable analysis, a 50% decline in visits to nonessential businesses was associated with a 45% decline in Rt (95%CI, 43%-49%). With a 70% decrease in visits to nonessential business, a fall below a threshold Rt of 1.0 was estimated in 202 counties (95.7%), including 17 of 21 counties (81.0%) in the top density decile and 52 of 53 counties (98.1%) in the lowest density quartile.                     |
| Saez et al. (56)<br>Research report;<br>17/1/2020-5/4/2020<br>Time series analysis on the new daily cases        | Spain<br>High                    | Reducing travel, avoiding crowded places, using non-contact greetings | ✓                        | Closure of workplaces, stadiums, cinemas, theatres and restaurants |                                                                | ✓                                        | Quarantines, travel restrictions | After implementing the measures for one day, the variation rate of accumulated cases decreased daily by 3.059 percentage points on average (95% credibility interval: -5.371, -0.879) and the decline was greater when time passed and reached 5.11 percentage points on the last day of data collection. Despite not entering the decrease phase, the measures taken by the Spanish Government on March 14, 2020 managed to flatten the curve. |
| Siedner et al. (26);<br>Research article;<br>10/3/2020-26/5/2020<br>Longitudinal pretest-posttest                | All 50 states of the US,<br>High | Statewide social distancing measures with cancellation                | ✓                        | ✓                                                                  | Restrictions on internal movement and closure of state borders |                                          |                                  | <b>(Incidence)</b> The mean daily COVID-19 case growth rate dropped by 0.9% per day, starting 4 days after implementation of the first statewide social distancing measures.<br><b>(Mortality)</b> After implementing social distancing for 7 days, the COVID-19-                                                                                                                                                                               |

| Article and Study Characteristics                                                                                           |                                                                                                         | Type of Social Distancing Measures      |                          |                                                      |                                     |                                                   |                                                        | Effectiveness Indicators                                                                                                                                                                                                                                                                                                                                                                                         |
|-----------------------------------------------------------------------------------------------------------------------------|---------------------------------------------------------------------------------------------------------|-----------------------------------------|--------------------------|------------------------------------------------------|-------------------------------------|---------------------------------------------------|--------------------------------------------------------|------------------------------------------------------------------------------------------------------------------------------------------------------------------------------------------------------------------------------------------------------------------------------------------------------------------------------------------------------------------------------------------------------------------|
| Authors; article type; study period/ publication date; study design                                                         | Country/ region; economy level                                                                          | Social distancing between individuals   | School measure / closure | Workplace measure / closure                          | Public transport restriction        | Stay-at-home recommendation / ordinances          | Others                                                 | <b>Infectivity:</b> Rt, effective reduction number<br><b>Incidence:</b> incidence, incidence rate, attack rate, bed occupancy rate<br><b>Mortality:</b> Mortality or fatality rate<br><b>Effect time:</b> Action and effect duration, time of reaching peak<br><b>Attendance:</b> Attendance % of location, daily vehicles miles, daily contact frequency, mobility of leaving home, travel distance             |
| comparison study of incidence and mortality                                                                                 |                                                                                                         | of public events                        |                          |                                                      |                                     |                                                   |                                                        | attributed mortality growth rate fell by 2.0% per day, although this decline was no longer statistically significant by 10 days.                                                                                                                                                                                                                                                                                 |
| Thu et al.(39); Research article; 11/1 - 2/5/2020<br>Time-series analysis based on daily cases                              | 10 countries: the US, Spain, Italy, UK, France, Germany, Russia, Turkey, Iran and China; Middle to High | Cancellation of public events           | ✓                        | Work from home, cancellation of non-essential events | Domestic transportation restriction | By region and, by nationwide, by different phases | Entry restrictions to those from highly infected areas | <b>(Incidence):</b> Growth rates of daily confirmed cases in the UK and the US were the most severe, at 99.9%, followed by Spain at 99.2%, France at 96.2%, Italy at 95.4%, Germany at 85%, Russia at 72.2%, Turkey at 70.7% and Iran at 62.8%. Countries with high growth rate showed lower decline rate, showing longer time needed for those countries to control the epidemic by social distancing measures. |
| Vokó et al.(57); Research article; 1/2/2020-18/4/2020<br>Modelling study using daily new cases                              | 28 European countries; High                                                                             | Social distancing with public event ban | ✓                        | ✓                                                    | ✓                                   | ✓                                                 |                                                        | (Incidence) Incidence of new COVID-19 cases grew by 24% per day on average before the changepoint. From the changepoint observed, the growth rate was reduced to 0.9%, 0.3% increase, and to 0.7% and 1.7% decrease by increasing social distancing quartiles based on Social distance index (SDI) calculated based on Google Community Mobility Reports.                                                        |
| Wan et al.(31); Research article; 20/1/2020-3/3/2020<br>Modelling study using incidence data, with death and recovery cases | Mainland of China excluding Hubei; Middle                                                               | Social distancing and self-isolation    |                          |                                                      | ✓                                   |                                                   | Close contact tracing, body temperature measurement    | <b>(Infectivity)</b> Rt has dropped sharply from 3.34 on 20 January 2020 to 0.89 on 31 January 2020, after integrated control strategies were implemented.                                                                                                                                                                                                                                                       |
| Weill et al. (19); Research article; 1/1/2020-21/4/2020<br>Event study design on behavior                                   | The US; High                                                                                            | ✓                                       |                          | business closures                                    |                                     | Safer-at-home orders                              |                                                        | <b>(Attendance):</b> Median distance traveled, retail and recreation, locations visited by a mobile device per day showed a sharp decrease in March after the implementation of social distancing measures, with the                                                                                                                                                                                             |



| Article and Study Characteristics                                                                                                                                      |                                                                                                              | Type of Social Distancing Measures    |                          |                             |                              |                                          |                          | Effectiveness Indicators                                                                                                                                                                                                                                                                                                                                                                             |
|------------------------------------------------------------------------------------------------------------------------------------------------------------------------|--------------------------------------------------------------------------------------------------------------|---------------------------------------|--------------------------|-----------------------------|------------------------------|------------------------------------------|--------------------------|------------------------------------------------------------------------------------------------------------------------------------------------------------------------------------------------------------------------------------------------------------------------------------------------------------------------------------------------------------------------------------------------------|
| Authors; article type; study period/ publication date; study design                                                                                                    | Country/ region; economy level                                                                               | Social distancing between individuals | School measure / closure | Workplace measure / closure | Public transport restriction | Stay-at-home recommendation / ordinances | Others                   | <b>Infectivity:</b> Rt, effective reduction number<br><b>Incidence:</b> incidence, incidence rate, attack rate, bed occupancy rate<br><b>Mortality:</b> Mortality or fatality rate<br><b>Effect time:</b> Action and effect duration, time of reaching peak<br><b>Attendance:</b> Attendance % of location, daily vehicles miles, daily contact frequency, mobility of leaving home, travel distance |
| subsequent to state emergency orders                                                                                                                                   |                                                                                                              |                                       |                          |                             |                              |                                          |                          | wealthier areas decreasing mobility more significantly than poorer areas. However, the trend shifted reversely after March regarding completely staying at home. People from wealthier areas shifted from the lowest before March to the most likely to completely stay at home after March, vice versa for those in poorer countries.                                                               |
| Wilasang et al.(58); Research article; From the date of 100 cases to 7/4/2020<br>Analysis on the number of daily new cases and the distribution of the serial interval | 10 countries: Belgium, China, France, Germany, Iran, South Korea, Spain, Thailand, US and UK; Middle to High | ✓                                     |                          |                             |                              | ✓                                        | Active case finding      | <b>(Infectivity):</b> After 3-week control measures, only China and South Korea were successful in controlling the disease ( $R_t < 1$ ), while the others were unsuccessful. The study observed that countries with active case finding and prompt isolation could have a reduction in the reproduction number more rapidly.                                                                        |
| Yehya et al.(59); Research article; 21/1-29/42020<br>Ecological study using secondary data to analyze relationship between timing of interventions and mortality       | The US; High                                                                                                 |                                       | School closure           |                             |                              |                                          | Declaration of Emergency | <b>(Mortality):</b> Each day of delay of either intervention increased mortality risk by 5-6%.                                                                                                                                                                                                                                                                                                       |
| Zhang et al.(33); Research article; 24 – 30/12/2019 as baseline                                                                                                        | Wuhan and Shanghai; Middle                                                                                   |                                       | ✓                        |                             | ✓                            |                                          |                          | <b>(Attendance):</b> Daily contact frequency in Wuhan showed a reduction from 14.6 to 2.0 while Shanghai from 18.8 to 2.3. The trend was consistent with mobility data of an                                                                                                                                                                                                                         |

| Article and Study Characteristics                                                                          |                                                 | Type of Social Distancing Measures                         |                          |                             |                              |                                          |           | Effectiveness Indicators                                                                                                                                                                                                                                                                                                                                                                                                                                                                                                                                                                                                                               |
|------------------------------------------------------------------------------------------------------------|-------------------------------------------------|------------------------------------------------------------|--------------------------|-----------------------------|------------------------------|------------------------------------------|-----------|--------------------------------------------------------------------------------------------------------------------------------------------------------------------------------------------------------------------------------------------------------------------------------------------------------------------------------------------------------------------------------------------------------------------------------------------------------------------------------------------------------------------------------------------------------------------------------------------------------------------------------------------------------|
| Authors; article type; study period/ publication date; study design                                        | Country/ region; economy level                  | Social distancing between individuals                      | School measure / closure | Workplace measure / closure | Public transport restriction | Stay-at-home recommendation / ordinances | Others    | <b>Infectivity:</b> Rt, effective reduction number<br><b>Incidence:</b> incidence, incidence rate, attack rate, bed occupancy rate<br><b>Mortality:</b> Mortality or fatality rate<br><b>Effect time:</b> Action and effect duration, time of reaching peak<br><b>Attendance:</b> Attendance % of location, daily vehicles miles, daily contact frequency, mobility of leaving home, travel distance                                                                                                                                                                                                                                                   |
| and 1-10/2/2020 as outbreak period<br>Analysis on contact survey data reported by 1,193 study participants |                                                 |                                                            |                          |                             |                              |                                          |           | 86.9% and a 74.5% drop in Wuhan and Shanghai respectively.                                                                                                                                                                                                                                                                                                                                                                                                                                                                                                                                                                                             |
| Zhang et al. (43); Research article; 23/1– 9/5/2020<br>Analysis of the changes in incidence                | Wuhan (China), Italy and the US; Middle to High | ✓                                                          |                          |                             |                              | Stay-at-home                             | Face mask | <b>(Incidence):</b> Daily new infection in New York decreased with a slope of 106 cases per day (decreasing rate at around 3%) after face mask-on policy, while US (excluding New York) increased with a slope of 70 cases per day (increasing rate at around 0.3%). The decreasing rate in the daily new infections in New York with face covering mandate was proportionately higher than that in the United States with only social distancing and stay-at-home order, illustrating the importance of face covering on stemming the virus spread.<br>With mask-on policy, Italy showed an infection reduction by over 75,000 from April 6 to May 9. |
| 58 <sup>th</sup> SAGE meeting summary (23); Review;                                                        | The UK; High                                    |                                                            |                          |                             |                              | Lockdown, short stay-at-home order       |           | <b>(Infectivity):</b> Lockdown was very impactful and reduced Rt from 2.7 to 0.6. 2-3 week short stay-at-home order had moderate impact on reducing Rt to less than 1. Both showed high confidence correlation.                                                                                                                                                                                                                                                                                                                                                                                                                                        |
|                                                                                                            |                                                 | Decreasing contact between households, closure of worship/ |                          |                             |                              |                                          |           | <b>(Infectivity):</b> Moderate impact was found by stopping contacts among different households, reducing Rt by around 0.1-0.2. Low to moderate impact was shown following closure of worship/ community centers, with a potential reduction in Rt up to                                                                                                                                                                                                                                                                                                                                                                                               |

| Article and Study Characteristics                                   |                                | Type of Social Distancing Measures                   |                                                                                                                                                                      |                                         |                                                                                    |                                          | Effectiveness Indicators |                                                                                                                                                                                                                                                                                                                                                                                                                                                                                                                                                                                                                                      |
|---------------------------------------------------------------------|--------------------------------|------------------------------------------------------|----------------------------------------------------------------------------------------------------------------------------------------------------------------------|-----------------------------------------|------------------------------------------------------------------------------------|------------------------------------------|--------------------------|--------------------------------------------------------------------------------------------------------------------------------------------------------------------------------------------------------------------------------------------------------------------------------------------------------------------------------------------------------------------------------------------------------------------------------------------------------------------------------------------------------------------------------------------------------------------------------------------------------------------------------------|
| Authors; article type; study period/ publication date; study design | Country/ region; economy level | Social distancing between individuals                | School measure / closure                                                                                                                                             | Workplace measure / closure             | Public transport restriction                                                       | Stay-at-home recommendation / ordinances | Others                   | <b>Infectivity:</b> Rt, effective reduction number<br><b>Incidence:</b> incidence, incidence rate, attack rate, bed occupancy rate<br><b>Mortality:</b> Mortality or fatality rate<br><b>Effect time:</b> Action and effect duration, time of reaching peak<br><b>Attendance:</b> Attendance % of location, daily vehicles miles, daily contact frequency, mobility of leaving home, travel distance                                                                                                                                                                                                                                 |
|                                                                     |                                | community centers, restriction on outdoor gatherings |                                                                                                                                                                      |                                         |                                                                                    |                                          |                          | 0.1. Low impact came with the restriction on outdoor gatherings, with Rt being reduced to less than 0.05, considering the frailty of SARS-CoV2 under well-ventilated environment.                                                                                                                                                                                                                                                                                                                                                                                                                                                    |
|                                                                     |                                |                                                      |                                                                                                                                                                      |                                         | Local 5-mile travel restriction, use of public transport restricted to key workers |                                          |                          | <b>(Infectivity):</b> The impact of 5-mile travel restriction was considered as low to moderate, with limited benefit especially when local outbreak was widespread. Restricted use of public transport to key workers might have low impact due to low level of crowding, mandated face-mask policy and inconclusive evidence of the transmission risk in public transport.                                                                                                                                                                                                                                                         |
|                                                                     |                                |                                                      | Mass / reactive school closure, closure of class with infection, alternative school schedules with half class sizes, closure of further/ high education or childcare |                                         |                                                                                    |                                          |                          | <b>(Infectivity):</b> Moderate impact of closing all schools was found, with a reduction in Rt of 0.2~0.5 while closing secondary schools was considered to be more effective, with a Rt drop of 0.35. Reactive school closure might have a moderate impact on the reduction in Rt of 0.12 ~ 0.45 whereas low to moderate impact was estimated for reactive closure of class with infection. Alternative school schedules with reduced class size were suggested to have moderate to low impact. Closure of further / higher education associated with moderate impact while closure of childcare might have low to moderate impact. |
|                                                                     |                                |                                                      |                                                                                                                                                                      | Work from home, alternate work, closure |                                                                                    |                                          |                          | <b>(Infectivity):</b> Moderate impact of work from home was evaluated with a Rt reduction of 0.2-0.4 if all people followed while low to                                                                                                                                                                                                                                                                                                                                                                                                                                                                                             |

| Article and Study Characteristics                                   |                                   | Type of Social Distancing Measures    |                          |                                                                                                                                                                       |                                                                                   |                                          |        | Effectiveness Indicators                                                                                                                                                                                                                                                                                                                                                                                                                                                                                                                                      |
|---------------------------------------------------------------------|-----------------------------------|---------------------------------------|--------------------------|-----------------------------------------------------------------------------------------------------------------------------------------------------------------------|-----------------------------------------------------------------------------------|------------------------------------------|--------|---------------------------------------------------------------------------------------------------------------------------------------------------------------------------------------------------------------------------------------------------------------------------------------------------------------------------------------------------------------------------------------------------------------------------------------------------------------------------------------------------------------------------------------------------------------|
| Authors; article type; study period/ publication date; study design | Country/ region; economy level    | Social distancing between individuals | School measure / closure | Workplace measure / closure                                                                                                                                           | Public transport restriction                                                      | Stay-at-home recommendation / ordinances | Others | <b>Infectivity:</b> Rt, effective reduction number<br><b>Incidence:</b> incidence, incidence rate, attack rate, bed occupancy rate<br><b>Mortality:</b> Mortality or fatality rate<br><b>Effect time:</b> Action and effect duration, time of reaching peak<br><b>Attendance:</b> Attendance % of location, daily vehicles miles, daily contact frequency, mobility of leaving home, travel distance                                                                                                                                                          |
|                                                                     |                                   |                                       |                          | of bars/ pubs/ cafes/ restaurants, closure of gym/ leisure centers, non-essential retail, personal services, adherence to "COVID security" arrangements in workplaces |                                                                                   |                                          |        | moderate impact with a Rt drop up to 0.1 was estimated for alternate work. Moderate impact with potential reduction in Rt of 0.1-0.2 was predicted for the closure of bars/pub/restaurants. Closure of gym/ leisure centres associated with low to moderate impact, with potential reduction in Rt of up to 0.1. Impact of closure of non-essential retail and personal services was estimated to be limited. Adherence to "COVID security" in workplaces such as improved hand/ surface hygiene and added barrier setting was also considered as low impact. |
| ECDC (12); Review; Published on 24 Sept 2020                        | Members of the EU countries; High |                                       |                          |                                                                                                                                                                       |                                                                                   | Stay-at-home                             |        | <b>(Infectivity):</b> Rt reduced by 18% (ranging from 4-31%).                                                                                                                                                                                                                                                                                                                                                                                                                                                                                                 |
|                                                                     |                                   | Physical distance between 1-2m        |                          |                                                                                                                                                                       |                                                                                   |                                          |        | <b>(Infectivity):</b> Physical distancing of 1 metre or more was linked to an approximately five-fold reduction of the transmission risk, with the protective effect being doubled for every extra metre added.                                                                                                                                                                                                                                                                                                                                               |
|                                                                     |                                   |                                       |                          |                                                                                                                                                                       | Domestic travel restrictions: a cordon sanitaire or public transportation closure |                                          |        | <b>(Infectivity):</b> There were contradictory results on Rt among the studies. Modelling showed strong association while other studies showed no impact unless other NPI was put in place, e.g. physical distancing. It was difficult to relate observed changes in transmission dynamics to a single measure.                                                                                                                                                                                                                                               |
|                                                                     |                                   |                                       | School closure           |                                                                                                                                                                       |                                                                                   |                                          |        | <b>(Incidence):</b> Observational data suggested that reopening schools has not been associated with significant increases in community transmission.                                                                                                                                                                                                                                                                                                                                                                                                         |

| Article and Study Characteristics                                   |                                | Type of Social Distancing Measures    |                          |                                                                                                           |                              |                                          | Effectiveness Indicators                                                                                                                                                                                                                                                                                                                                                                                                                                                                                                                                                                                                     |
|---------------------------------------------------------------------|--------------------------------|---------------------------------------|--------------------------|-----------------------------------------------------------------------------------------------------------|------------------------------|------------------------------------------|------------------------------------------------------------------------------------------------------------------------------------------------------------------------------------------------------------------------------------------------------------------------------------------------------------------------------------------------------------------------------------------------------------------------------------------------------------------------------------------------------------------------------------------------------------------------------------------------------------------------------|
| Authors; article type; study period/ publication date; study design | Country/ region; economy level | Social distancing between individuals | School measure / closure | Workplace measure / closure                                                                               | Public transport restriction | Stay-at-home recommendation / ordinances | Others                                                                                                                                                                                                                                                                                                                                                                                                                                                                                                                                                                                                                       |
|                                                                     |                                |                                       |                          | Work from home, flexible working time and social distancing measures, closure of non-essential businesses |                              |                                          |                                                                                                                                                                                                                                                                                                                                                                                                                                                                                                                                                                                                                              |
|                                                                     |                                |                                       |                          |                                                                                                           |                              |                                          | <p><b>Infectivity:</b> Rt, effective reduction number</p> <p><b>Incidence:</b> incidence, incidence rate, attack rate, bed occupancy rate</p> <p><b>Mortality:</b> Mortality or fatality rate</p> <p><b>Effect time:</b> Action and effect duration, time of reaching peak</p> <p><b>Attendance:</b> Attendance % of location, daily vehicles miles, daily contact frequency, mobility of leaving home, travel distance</p> <p><b>(Infectivity):</b> There was a 40% Rt reduction by closing most of non-essential businesses while 31% by closing high risk businesses, e.g. restaurant/ bars/ nightclub/ cinemas/ gym.</p> |

For peer review only

1  
2  
3  
4  
5  
6  
7  
8  
9  
10  
11  
12  
13  
14  
15  
16  
17  
18  
19  
20  
21  
22  
23  
24  
25  
26  
27  
28  
29  
30  
31  
32  
33  
34  
35  
36  
37  
38  
39  
40  
41  
42  
43  
44  
45  
46

**Table 3 Comparison of the major outcomes of different types/levels of social distancing**

|                                                                                                             | <b>Social distancing between individuals</b>                                                                                                                                                                                                                                                  | <b>School closure</b>                                                                                                                                                                                                                       | <b>Workplace measures</b>                                                                                                                                                                                                                                                          | <b>Public transport restriction</b>                | <b>“Partial” lockdown</b>                                                                                                                                                 | <b>Full lockdown</b>                                                                                                                                                                                                                                                                                                                                                                               |
|-------------------------------------------------------------------------------------------------------------|-----------------------------------------------------------------------------------------------------------------------------------------------------------------------------------------------------------------------------------------------------------------------------------------------|---------------------------------------------------------------------------------------------------------------------------------------------------------------------------------------------------------------------------------------------|------------------------------------------------------------------------------------------------------------------------------------------------------------------------------------------------------------------------------------------------------------------------------------|----------------------------------------------------|---------------------------------------------------------------------------------------------------------------------------------------------------------------------------|----------------------------------------------------------------------------------------------------------------------------------------------------------------------------------------------------------------------------------------------------------------------------------------------------------------------------------------------------------------------------------------------------|
| <b>Relative frequency and consistency of evidence#</b>                                                      | Adequate                                                                                                                                                                                                                                                                                      | Moderate                                                                                                                                                                                                                                    | Limited                                                                                                                                                                                                                                                                            | No                                                 | Adequate                                                                                                                                                                  | Adequate                                                                                                                                                                                                                                                                                                                                                                                           |
| <b>(Infectivity):<br/>R<sub>t</sub>, effective reduction number</b>                                         | Physical distancing of 1 meter or more could reduce the transmission risk by 5 times and the protective impact was double for every extra meter (17).<br><br>Estimated R <sub>t</sub> reduced by 36%, 28% and 12% when gatherings were limited to 10, 100 and 1,000 people respectively (18). |                                                                                                                                                                                                                                             | Estimated 29% R <sub>t</sub> reduction by closing most of non-essential businesses while 20% by closing high risk businesses (18).<br><br>In the US, a 50% decline in visits to nonessential businesses was associated with a 45% decline in R <sub>t</sub> [95%CI, 43%-49%] (20). | No difference in reduction in R <sub>t</sub> (11). | In Mainland China excluding Hubei (province of Wuhan), R <sub>t</sub> dropped from 3.34 to 0.89 (31).<br><br>In 58 cities of China, R <sub>t</sub> dropped by 54.3% (32). | From data of 41 countries, estimated R <sub>t</sub> reduced by 10% by stay-at-home orders (-2%–22%) (18).<br><br>UK estimation suggested that country lockdown could reduce R <sub>t</sub> from 2.7 to 0.6 while 2-3 week short stay-at-home order had moderate impact by reducing R <sub>t</sub> to below 1 (23).<br><br>China R <sub>t</sub> reduced from 2.35 to 1.05 during the lockdown (52). |
| <b>(Incidence):<br/>Infection incidence/ ratio of incidence rate ratio/ attack rate/ bed occupancy rate</b> | In the US, COVID-19 infection was less likely among the public who always practiced social distancing (aOR for indoor social distancing, 0.32 [95% CI, .10–.99]; aOR for outdoor social distancing, 0.10 [95% CI, .03–.33] (21).                                                              | In the US, school closure decreased COVID-19 incidence (adjusted relative change per week, -62%) (25).<br><br>Observational data from a number of the EU countries suggested that re-opening of schools was not associated with increase of |                                                                                                                                                                                                                                                                                    |                                                    | In the US, mean daily COVID-19 case growth rate decreased by 0.9% per day four days after lockdown (26).                                                                  | Data from 32 countries showed decreased incidence of COVID-19 (pooled incident rate ratio, IRR 0.87, 0.84 to 0.91) (11).<br><br>Growth rate of daily confirmed cases reduced by 5.4% after 1-5 days, 6.8% after 6-10 days, 8.2% after 11-15 days, 9.1% after 16-20 days (38).                                                                                                                      |

|                                                                                                                                             |  |                                                                                                                    |  |  |                                                                                                              |                                                                                                                                                                                                                                                                                                                                                                                        |
|---------------------------------------------------------------------------------------------------------------------------------------------|--|--------------------------------------------------------------------------------------------------------------------|--|--|--------------------------------------------------------------------------------------------------------------|----------------------------------------------------------------------------------------------------------------------------------------------------------------------------------------------------------------------------------------------------------------------------------------------------------------------------------------------------------------------------------------|
|                                                                                                                                             |  | community transmission (12).                                                                                       |  |  |                                                                                                              |                                                                                                                                                                                                                                                                                                                                                                                        |
| <b>(Mortality):<br/>Mortality/ Fatality rate</b>                                                                                            |  | In the US, school closure decreased COVID-19 related mortality (~58%) (25).                                        |  |  | In the US, COVID-19-attributed mortality growth rate decreased by 2% per day seven days after lockdown (26). |                                                                                                                                                                                                                                                                                                                                                                                        |
| <b>(Effect time):<br/>Action and Effect duration / Time of Reaching peak</b>                                                                |  |                                                                                                                    |  |  | In 58 cities of China, mean time until successful containment was 8 days (32).                               |                                                                                                                                                                                                                                                                                                                                                                                        |
| <b>(Attendance):<br/>Attendance % of location/ daily vehicles miles/ daily contact frequency/ Mobility of leaving home/ distance travel</b> |  | In Florida, the US found that closing of schools resulted in a 40-55% reduction in average distance traveled (24). |  |  | In Spain, self-reported walking time decreased by 58.2% (49).                                                | In Wuhan and Shanghai, the average daily number of contacts dropped from 14.6 to 2 and 18.8 to 2.3 respectively during lockdown. Mobility dropped 86.9% and 74.5% in respective areas (33).<br><br>Stay-at-home order in Florida of the US resulted in a reduction of in-person encounters by 74-82%, visits to nonessential venues by 55%, and overall distance traveled by 45% (24). |

# Relative frequency and consistency of evidence based on the studies reviewed, without risk of bias assessment



## References

1. Kwok KO, Lai F, Wei WI, Wong SYS, Tang JWT. Herd immunity - estimating the level required to halt the COVID-19 epidemics in affected countries. *J Infect*. 2020;80(6):e32-e3.
2. WHO. Non-pharmaceutical public health measures for mitigating the risk and impact of epidemic and pandemic influenza. Geneva; 2019.
3. WHO. COVID-19: physical distancing 2020 [Available from: <https://www.who.int/westernpacific/emergencies/covid-19/information/physical-distancing>].
4. Chowdhury R, Luhar S, Khan N, Choudhury SR, Matin I, Franco OH. Long-term strategies to control COVID-19 in low and middle-income countries: an options overview of community-based, non-pharmacological interventions. *European Journal of Epidemiology*. 2020.
5. Lino DODC, Barreto R, Souza FDD, Lima CJMD, Silva Junior GBD. Impact of lockdown on bed occupancy rate in a referral hospital during the COVID-19 pandemic in northeast Brazil. *Brazilian Journal of Infectious Diseases*. 2020;24(5):466-9.
6. Pepin JL, Bruno RM, Yang RY, Vercamer V, Jouhaud P, Escourrou P, et al. Wearable Activity Trackers for Monitoring Adherence to Home Confinement During the COVID-19 Pandemic Worldwide: Data Aggregation and Analysis. *Journal of medical Internet research*. 2020;22(6):e19787.
7. Viner RM, Russell SJ, Croker H, Packer J, Ward J, Stansfield C, et al. School closure and management practices during coronavirus outbreaks including COVID-19: a rapid systematic review. *The Lancet Child and Adolescent Health*. 2020;4(5):397-404.
8. Chowdhury R, Heng K, Shawon MSR, Goh G, Okonofua D, Ochoa-Rosales C, et al. Dynamic interventions to control COVID-19 pandemic: a multivariate prediction modelling study comparing 16 worldwide countries. *European Journal of Epidemiology*. 2020;35(5):389-99.
9. Lai S, Ruktanonchai NW, Zhou L, Prosper O, Luo W, Floyd JR, et al. Effect of non-pharmaceutical interventions to contain COVID-19 in China. *Nature*. 2020.
10. Nussbaumer-Streit B, Mayr V, Dobrescu AI, Chapman A, Persad E, Klerings I, et al. Quarantine alone or in combination with other public health measures to control COVID-19: a rapid review. *The Cochrane database of systematic reviews*. 2020;4:CD013574.
11. Islam N, Sharp SJ, Chowell G, Shabnam S, Kawachi I, Lacey B, et al. Physical distancing interventions and incidence of coronavirus disease 2019: natural experiment in 149 countries. *BMJ*. 2020;370:m2743.
12. ECDC. Guidelines for non-pharmaceutical interventions to reduce the impact of COVID-19 in the EU/EEA and the UK. . Stockholm; 2020.
13. Meyer J, Pare G. Telepathology Impacts and Implementation Challenges: A Scoping Review. *Arch Pathol Lab Med*. 2015;139(12):1550-7.
14. Tricco AC, Zarin W, Rios P, Nincic V, Khan PA, Ghassemi M, et al. Engaging policy-makers, health system managers, and policy analysts in the knowledge synthesis process: a scoping review. *Implement Sci*. 2018;13(1):31.
15. Lockwood C, Tricco AC. Preparing scoping reviews for publication using methodological guides and reporting standards. *Nurs Health Sci*. 2020;22(1):1-4.
16. Tricco AC, Lillie E, Zarin W, O'Brien KK, Colquhoun H, Levac D, et al. PRISMA Extension for Scoping Reviews (PRISMA-ScR): Checklist and Explanation. *Ann Intern Med*. 2018;169(7):467-73.
17. Chu DK, Akl EA, Duda S, Solo K, Yaacoub S, Schünemann HJ. Physical distancing, face masks, and eye protection to prevent person-to-person transmission of SARS-CoV-2 and COVID-19: a systematic review and meta-analysis. *Lancet*. 2020;395(10242):1973-87.



18. Brauner JM, Mindermann S, Sharma M, Johnston D, Salvatier J, Gavenčiak T, et al. The effectiveness of eight nonpharmaceutical interventions against COVID-19 in 41 countries. medRxiv. 2020:2020.05.28.20116129.
19. Weill JA, Stigler M, Deschenes O, Springborn MR. Social distancing responses to COVID-19 emergency declarations strongly differentiated by income. Proceedings of the National Academy of Sciences of the United States of America. 2020;117(33):19658-60.
20. Rubin D, Huang J, Fisher BT, Gasparrini A, Tam V, Song L, et al. Association of Social Distancing, Population Density, and Temperature with the Instantaneous Reproduction Number of SARS-CoV-2 in Counties across the United States. JAMA Network Open. 2020;3(7) (no pagination).
21. Clipman SJ, Wesolowski AP, Gibson DG, Agarwal S, Lambrou AS, Kirk GD, et al. Rapid real-time tracking of non-pharmaceutical interventions and their association with SARS-CoV-2 positivity: The COVID-19 Pandemic Pulse Study. Clinical infectious diseases : an official publication of the Infectious Diseases Society of America. 2020;02.
22. Lemaitre JC, Perez-Saez J, Azman AS, Rinaldo A, Fellay J. Assessing the impact of non-pharmaceutical interventions on SARS-CoV-2 transmission in Switzerland. Swiss Medical Weekly. 2020;150(21-22) (no pagination).
23. SAGE. The effectiveness and harms of non-pharmaceutical interventions. 2020 21 September 2020.
24. Rivkees SA, Roberson S. The Florida Department of Health STEPS Public Health Approach: The COVID-19 Response Plan and Outcomes Through May 31, 2020. Public Health Reports. 2020;135(5):560-4.
25. Auger KA, Shah SS, Richardson T, Hartley D, Hall M, Warniment A, et al. Association Between Statewide School Closure and COVID-19 Incidence and Mortality in the US. JAMA. 2020;324(9):859-70.
26. Siedner MJ, Harling G, Reynolds Z, Gilbert RF, Haneuse S, Venkataramani AS, et al. Social distancing to slow the US COVID-19 epidemic: Longitudinal pretest-posttest comparison group study. PLoS Medicine. 2020;17(8 August).
27. Otte Im Kampe E, Lehfeld AS, Buda S, Buchholz U, Haas W. Surveillance of COVID-19 school outbreaks, Germany, March to August 2020. Euro Surveill. 2020;25(38).
28. Ehrhardt J, Ekinci A, Krehl H, Meincke M, Finci I, Klein J, et al. Transmission of SARS-CoV-2 in children aged 0 to 19 years in childcare facilities and schools after their reopening in May 2020, Baden-Wurtemberg, Germany. Euro Surveill. 2020;25(36).
29. Macartney K, Quinn HE, Pillsbury AJ, Koirala A, Deng L, Winkler N, et al. Transmission of SARS-CoV-2 in Australian educational settings: a prospective cohort study. Lancet Child Adolesc Health. 2020;4(11):807-16.
30. Randhawa AK, Fisher LH, Greninger AL, Li SS, Andriesen J, Corey L, et al. Changes in SARS-CoV-2 Positivity Rate in Outpatients in Seattle and Washington State, March 1-April 16, 2020. JAMA. 2020;323(22):2334-6.
31. Wan H, Cui JA, Yang GJ. Risk estimation and prediction of the transmission of coronavirus disease-2019 (COVID-19) in the mainland of China excluding Hubei province. Infectious Diseases of Poverty. 2020;9(1).
32. Du Z, Xu X, Wang L, Fox SJ, Cowling BJ, Galvani AP, et al. Effects of Proactive Social Distancing on COVID-19 Outbreaks in 58 Cities, China. Emerging infectious diseases. 2020;26(9).
33. Zhang J, Litvinova M, Liang Y, Wang Y, Wang W, Zhao S, et al. Changes in contact patterns shape the dynamics of the COVID-19 outbreak in China. Science (New York, NY). 2020;368(6498):1481-6.

- 1  
2  
3 34. Pan A, Liu L, Wang C, Guo H, Hao X, Wang Q, et al. Association of Public Health  
4 Interventions with the Epidemiology of the COVID-19 Outbreak in Wuhan, China. *JAMA - Journal*  
5 *of the American Medical Association*. 2020;323(19):1915-23.
- 6 35. Lim JT, Dickens BSL, Choo ELW, Chew LZX, Koo JRH, Tam C, et al. Revealing regional  
7 disparities in the transmission potential of SARS-CoV-2 from interventions in Southeast Asia. *Proc*  
8 *Biol Sci*. 2020;287(1933):20201173.
- 9 36. Marschner IC. Back-projection of COVID-19 diagnosis counts to assess infection incidence  
10 and control measures: Analysis of Australian data. *Epidemiology and Infection*. 2020.
- 11 37. Koh WC, Naing L, Wong J. Estimating the impact of physical distancing measures in  
12 containing COVID-19: an empirical analysis. *International Journal of Infectious Diseases*.  
13 2020;100:42-9.
- 14 38. Courtemanche C, Garuccio J, Le A, Pinkston J, Yelowitz A. Strong Social Distancing  
15 Measures In The United States Reduced The COVID-19 Growth Rate. *Health affairs (Project Hope)*.  
16 2020;39(7):1237-46.
- 17 39. Thu TPB, Ngoc PNH, Hai NM, Tuan LA. Effect of the social distancing measures on the  
18 spread of COVID-19 in 10 highly infected countries. *Science of the Total Environment*. 2020;742  
19 (no pagination)(140430).
- 20 40. Lam HY, Lam TS, Wong CH, Lam WH, Leung CME, Au KWA, et al. The epidemiology of  
21 COVID-19 cases and the successful containment strategy in Hong Kong-January to May 2020.  
22 *International Journal of Infectious Diseases*. 2020;98:51-8.
- 23 41. Cruz CHB. Social distancing in Sao Paulo State: demonstrating the reduction in cases using  
24 time series analysis of deaths due to COVID-19. *Rev Bras Epidemiol*. 2020;23:e200056.
- 25 42. Huynh TLD. Does culture matter social distancing under the COVID-19 pandemic? *Saf Sci*.  
26 2020;130:104872.
- 27 43. Zhang R, Li Y, Zhang AL, Wang Y, Molina MJ. Identifying airborne transmission as the  
28 dominant route for the spread of COVID-19. *Proc Natl Acad Sci U S A*. 2020;117(26):14857-63.
- 29 44. Lai CKC, Ng RWY, Wong MCS, Chong KC, Yeoh YK, Chen Z, et al. Epidemiological  
30 characteristics of the first 100 cases of coronavirus disease 2019 (COVID-19) in Hong Kong Special  
31 Administrative Region, China, a city with a stringent containment policy. *Int J Epidemiol*.  
32 2020;49(4):1096-105.
- 33 45. Correia S, Luck S, Verner E. Pandemics Depress the Economy, Public Health Interventions  
34 Do Not: Evidence from the 1918 Flu. *SSRN Electronic Journal*. 2020.
- 35 46. Abel T, McQueen D. The COVID-19 pandemic calls for spatial distancing and social  
36 closeness: not for social distancing! *Int J Public Health*. 2020;65(3):231.
- 37 47. Kim SW, Su KP. Using psychoneuroimmunity against COVID-19. *Brain Behav Immun*.  
38 2020;87:4-5.
- 39 48. Our World in Data. Coronavirus (COVID-19) Vaccinations [Available from:  
40 <https://ourworldindata.org/covid-vaccinations>.  
41
- 42 49. Castaneda-Babarro A, Coca A, Arbillaga-Etxarri A, Gutierrez-Santamaria B. Physical  
43 activity change during COVID-19 confinement. *International Journal of Environmental Research*  
44 *and Public Health*. 2020;17(18):1-10.
- 45 50. Jarvis CI, Van Zandvoort K, Gimma A, Prem K, Klepac P, Rubin GJ, et al. Quantifying the  
46 impact of physical distance measures on the transmission of COVID-19 in the UK. *BMC medicine*.  
47 2020;18:1-10.
- 48 51. Juni P, Rothenbuhler M, Bobos P, Thorpe KE, da Costa BR, Fisman DN, et al. Impact of  
49 climate and public health interventions on the COVID-19 pandemic: a prospective cohort study.  
50 *CMAJ*. 2020;192(21):E566-E73.
- 51 52. Khanna RC, Cicinelli MV, Gilbert SS, Honavar SG, Murthy GSV. COVID-19 pandemic:  
52 Lessons learned and future directions. *Indian journal of ophthalmology*. 2020;68(5):703-10.
- 53  
54  
55  
56  
57  
58  
59  
60

- 1  
2  
3  
4  
5  
6  
7  
8  
9  
10  
11  
12  
13  
14  
15  
16  
17  
18  
19  
20  
21  
22  
23  
24  
25  
26  
27  
28  
29  
30  
31  
32  
33  
34  
35  
36  
37  
38  
39  
40  
41  
42  
43  
44  
45  
46  
47  
48  
49  
50  
51  
52  
53  
54  
55  
56  
57  
58  
59  
60
53. Lasry A, Kidder D, Hast M, Poovey J, Sunshine G, Winglee K, et al. Timing of Community Mitigation and Changes in Reported COVID-19 and Community Mobility - Four U.S. Metropolitan Areas, February 26-April 1, 2020. *Mmwr. 2020;Morbidity and mortality weekly report.* 69(15):451-7.
54. Munayco CV, Tariq A, Rothenberg R, Soto-Cabezas GG, Reyes MF, Valle A, et al. Early transmission dynamics of COVID-19 in a southern hemisphere setting: Lima-Peru: February 29<sup>th</sup>-March 30<sup>th</sup>, 2020. *Infectious Disease Modelling.* 2020;5:338-45.
55. Patel P, Athotra A, Vaisakh TP, Dikid T, Jain SK. Impact of nonpharmacological interventions on COVID-19 transmission dynamics in India. *Indian journal of public health.* 2020;64(Supplement):S142-S6.
56. Saez M, Tobias A, Varga D, Barceló MA. Effectiveness of the measures to flatten the epidemic curve of COVID-19. The case of Spain. *Science of the Total Environment.* 2020;727:138761.
57. Vokó Z, Pitter JG. The effect of social distance measures on COVID-19 epidemics in Europe: an interrupted time series analysis. *GeroScience.* 2020;42(4):1075-82.
58. Wilasang C, Sararat C, Jitsuk NC, Yolai N, Thammawijaya P, Auewarakul P, et al. Reduction in effective reproduction number of COVID-19 is higher in countries employing active case detection with prompt isolation. *Journal of travel medicine.* 2020;08.
59. Yehya N, Venkataramani A, Harhay MO. Statewide Interventions and Covid-19 Mortality in the United States: An Observational Study. *Clinical infectious diseases : an official publication of the Infectious Diseases Society of America.* 2020;08.

**Figure 1. PRISMA flow diagram of literature search and selection**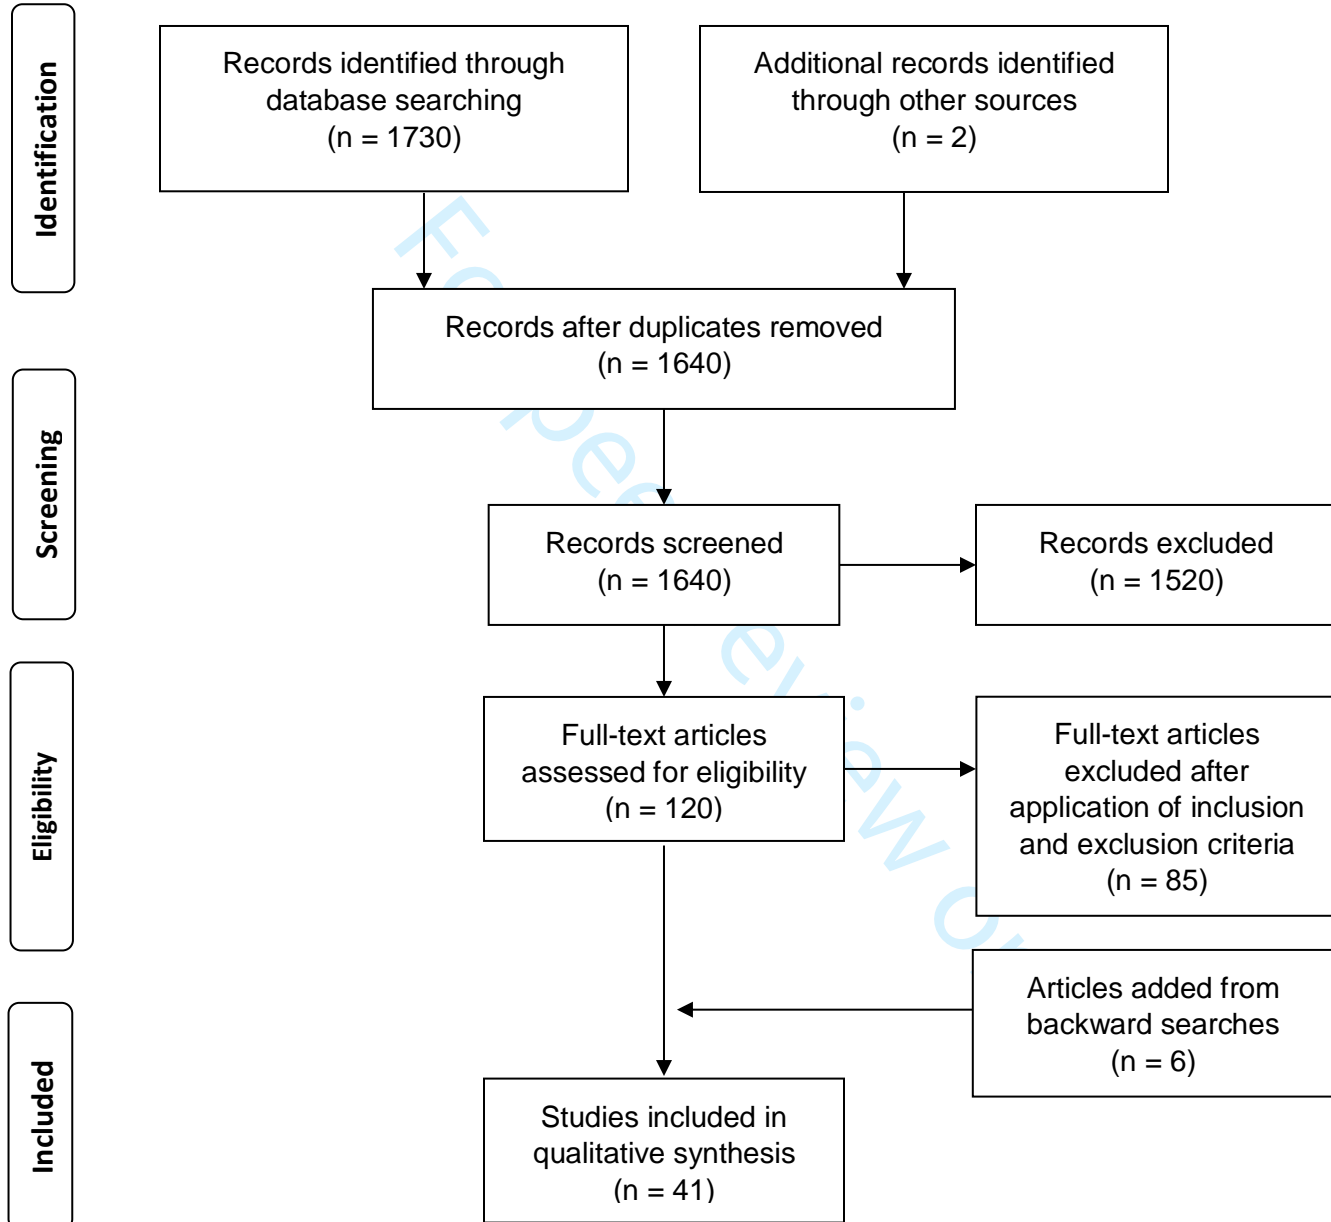

**Databases and search period:**

7 databases were selected and searched through Ovid platform.

**AMED (Allied and Complementary Medicine)** 1985 to September 2020, **Embase** 1910 to Present, **Global Health** 1973 to 2020 Week 40, **Ovid MEDLINE(R)** 1946 to September 30, 2020, **Ovid Nursing Database** 1946 to September Week 4 2020, **APA PsycInfo** 1806 to September Week 4 2020, **Social Work Abstracts** 1968 to September 2020

**Search terms:**

Sensitive search was conducted using these syntax, which included a higher number of articles (compared with specific search). Duplicated articles were removed after the searches.

"COVID\*".m\_titl. AND social distan\*.ab.

"COVID\*".m\_titl. AND physical distan\*.ab

"SARS-CoV-2\*".m\_titl. AND (social distan\* or physical distan\*).ab.

review only

## Preferred Reporting Items for Systematic reviews and Meta-Analyses extension for Scoping Reviews (PRISMA-ScR) Checklist

| SECTION                                               | ITEM | PRISMA-ScR CHECKLIST ITEM                                                                                                                                                                                                                                                                                  | REPORTED ON PAGE #                        |
|-------------------------------------------------------|------|------------------------------------------------------------------------------------------------------------------------------------------------------------------------------------------------------------------------------------------------------------------------------------------------------------|-------------------------------------------|
| <b>TITLE</b>                                          |      |                                                                                                                                                                                                                                                                                                            |                                           |
| Title                                                 | 1    | Identify the report as a scoping review.                                                                                                                                                                                                                                                                   | 1                                         |
| <b>ABSTRACT</b>                                       |      |                                                                                                                                                                                                                                                                                                            |                                           |
| Structured summary                                    | 2    | Provide a structured summary that includes (as applicable): background, objectives, eligibility criteria, sources of evidence, charting methods, results, and conclusions that relate to the review questions and objectives.                                                                              | 2                                         |
| <b>INTRODUCTION</b>                                   |      |                                                                                                                                                                                                                                                                                                            |                                           |
| Rationale                                             | 3    | Describe the rationale for the review in the context of what is already known. Explain why the review questions/objectives lend themselves to a scoping review approach.                                                                                                                                   | 4-5                                       |
| Objectives                                            | 4    | Provide an explicit statement of the questions and objectives being addressed with reference to their key elements (e.g., population or participants, concepts, and context) or other relevant key elements used to conceptualize the review questions and/or objectives.                                  | 5                                         |
| <b>METHODS</b>                                        |      |                                                                                                                                                                                                                                                                                                            |                                           |
| Protocol and registration                             | 5    | Indicate whether a review protocol exists; state if and where it can be accessed (e.g., a Web address); and if available, provide registration information, including the registration number.                                                                                                             | <a href="#">Click here to enter text.</a> |
| Eligibility criteria                                  | 6    | Specify characteristics of the sources of evidence used as eligibility criteria (e.g., years considered, language, and publication status), and provide a rationale.                                                                                                                                       | 6                                         |
| Information sources*                                  | 7    | Describe all information sources in the search (e.g., databases with dates of coverage and contact with authors to identify additional sources), as well as the date the most recent search was executed.                                                                                                  | 6                                         |
| Search                                                | 8    | Present the full electronic search strategy for at least 1 database, including any limits used, such that it could be repeated.                                                                                                                                                                            | 6                                         |
| Selection of sources of evidence†                     | 9    | State the process for selecting sources of evidence (i.e., screening and eligibility) included in the scoping review.                                                                                                                                                                                      | 6-7                                       |
| Data charting process‡                                | 10   | Describe the methods of charting data from the included sources of evidence (e.g., calibrated forms or forms that have been tested by the team before their use, and whether data charting was done independently or in duplicate) and any processes for obtaining and confirming data from investigators. | 7                                         |
| Data items                                            | 11   | List and define all variables for which data were sought and any assumptions and simplifications made.                                                                                                                                                                                                     | 8                                         |
| Critical appraisal of individual sources of evidence§ | 12   | If done, provide a rationale for conducting a critical appraisal of included sources of evidence; describe the methods used and how this information was used in any data synthesis (if appropriate).                                                                                                      | <a href="#">Click here to enter text.</a> |





| SECTION                                       | ITEM | PRISMA-ScR CHECKLIST ITEM                                                                                                                                                                       | REPORTED ON PAGE #        |
|-----------------------------------------------|------|-------------------------------------------------------------------------------------------------------------------------------------------------------------------------------------------------|---------------------------|
| Synthesis of results                          | 13   | Describe the methods of handling and summarizing the data that were charted.                                                                                                                    | 7                         |
| <b>RESULTS</b>                                |      |                                                                                                                                                                                                 |                           |
| Selection of sources of evidence              | 14   | Give numbers of sources of evidence screened, assessed for eligibility, and included in the review, with reasons for exclusions at each stage, ideally using a flow diagram.                    | 7                         |
| Characteristics of sources of evidence        | 15   | For each source of evidence, present characteristics for which data were charted and provide the citations.                                                                                     | 8-13, 24-35               |
| Critical appraisal within sources of evidence | 16   | If done, present data on critical appraisal of included sources of evidence (see item 12).                                                                                                      | Click here to enter text. |
| Results of individual sources of evidence     | 17   | For each included source of evidence, present the relevant data that were charted that relate to the review questions and objectives.                                                           | 24-35                     |
| Synthesis of results                          | 18   | Summarize and/or present the charting results as they relate to the review questions and objectives.                                                                                            | 8-13, 36-37               |
| <b>DISCUSSION</b>                             |      |                                                                                                                                                                                                 |                           |
| Summary of evidence                           | 19   | Summarize the main results (including an overview of concepts, themes, and types of evidence available), link to the review questions and objectives, and consider the relevance to key groups. | 13-14                     |
| Limitations                                   | 20   | Discuss the limitations of the scoping review process.                                                                                                                                          | 18                        |
| Conclusions                                   | 21   | Provide a general interpretation of the results with respect to the review questions and objectives, as well as potential implications and/or next steps.                                       | 19                        |
| <b>FUNDING</b>                                |      |                                                                                                                                                                                                 |                           |
| Funding                                       | 22   | Describe sources of funding for the included sources of evidence, as well as sources of funding for the scoping review. Describe the role of the funders of the scoping review.                 | 20                        |

JBI = Joanna Briggs Institute; PRISMA-ScR = Preferred Reporting Items for Systematic reviews and Meta-Analyses extension for Scoping Reviews.

\* Where *sources of evidence* (see second footnote) are compiled from, such as bibliographic databases, social media platforms, and Web sites.

† A more inclusive/heterogeneous term used to account for the different types of evidence or data sources (e.g., quantitative and/or qualitative research, expert opinion, and policy documents) that may be eligible in a scoping review as opposed to only studies. This is not to be confused with *information sources* (see first footnote).

‡ The frameworks by Arksey and O'Malley (6) and Levac and colleagues (7) and the JBI guidance (4, 5) refer to the process of data extraction in a scoping review as data charting.

§ The process of systematically examining research evidence to assess its validity, results, and relevance before using it to inform a decision. This term is used for items 12 and 19 instead of "risk of bias" (which is more applicable to systematic reviews of interventions) to include and acknowledge the various sources of evidence that may be used in a scoping review (e.g., quantitative and/or qualitative research, expert opinion, and policy document).

From: Tricco AC, Lillie E, Zarin W, O'Brien KK, Colquhoun H, Levac D, et al. PRISMA Extension for Scoping Reviews (PRISMA-ScR): Checklist and Explanation. *Ann Intern Med.* 2018;169:467–473. doi: [10.7326/M18-0850](https://doi.org/10.7326/M18-0850).

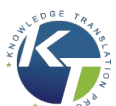

St. Michael's

Inspired Care.  
Inspiring Science.

For peer review only - <http://bmjopen.bmj.com/site/about/guidelines.xhtml>

# BMJ Open

## Effectiveness of different types and levels of social distancing measures: a scoping review of global evidence from earlier stage of COVID-19 pandemic

|                                 |                                                                                                                                                                                                                                                                                                                                                                                                                                                                                                                                                                                                                                                                                                                                                                                                                                                                                                                                                                                                                                                                                                                                                          |
|---------------------------------|----------------------------------------------------------------------------------------------------------------------------------------------------------------------------------------------------------------------------------------------------------------------------------------------------------------------------------------------------------------------------------------------------------------------------------------------------------------------------------------------------------------------------------------------------------------------------------------------------------------------------------------------------------------------------------------------------------------------------------------------------------------------------------------------------------------------------------------------------------------------------------------------------------------------------------------------------------------------------------------------------------------------------------------------------------------------------------------------------------------------------------------------------------|
| Journal:                        | <i>BMJ Open</i>                                                                                                                                                                                                                                                                                                                                                                                                                                                                                                                                                                                                                                                                                                                                                                                                                                                                                                                                                                                                                                                                                                                                          |
| Manuscript ID                   | bmjopen-2021-053938.R2                                                                                                                                                                                                                                                                                                                                                                                                                                                                                                                                                                                                                                                                                                                                                                                                                                                                                                                                                                                                                                                                                                                                   |
| Article Type:                   | Original research                                                                                                                                                                                                                                                                                                                                                                                                                                                                                                                                                                                                                                                                                                                                                                                                                                                                                                                                                                                                                                                                                                                                        |
| Date Submitted by the Author:   | 02-Mar-2022                                                                                                                                                                                                                                                                                                                                                                                                                                                                                                                                                                                                                                                                                                                                                                                                                                                                                                                                                                                                                                                                                                                                              |
| Complete List of Authors:       | Sun, Kai Sing; The Chinese University of Hong Kong, Centre for Health Systems and Policy Research, The Jockey Club School of Public Health and Primary Care<br>Lau, Terence See-Man; The Chinese University of Hong Kong, Centre for Health Systems and Policy Research, The Jockey Club School of Public Health and Primary Care<br>Yeoh, EK; The Chinese University of Hong Kong, Centre for Health Systems and Policy Research, The Jockey Club School of Public Health and Primary Care<br>Chung, Vincent; The Chinese University of Hong Kong, Centre for Health Systems and Policy Research, The Jockey Club School of Public Health and Primary Care<br>Leung, Yin Shan; The Chinese University of Hong Kong, Centre for Health Systems and Policy Research, The Jockey Club School of Public Health and Primary Care<br>Yam, Carrie; The Chinese University of Hong Kong, Centre for Health Systems and Policy Research, The Jockey Club School of Public Health and Primary Care<br>Hung, Chi-Tim; The Chinese University of Hong Kong, Centre for Health Systems and Policy Research, The Jockey Club School of Public Health and Primary Care |
| <b>Primary Subject Heading</b>: | Infectious diseases                                                                                                                                                                                                                                                                                                                                                                                                                                                                                                                                                                                                                                                                                                                                                                                                                                                                                                                                                                                                                                                                                                                                      |
| Secondary Subject Heading:      | Public health, Epidemiology, Health policy                                                                                                                                                                                                                                                                                                                                                                                                                                                                                                                                                                                                                                                                                                                                                                                                                                                                                                                                                                                                                                                                                                               |
| Keywords:                       | COVID-19, EPIDEMIOLOGY, Infection control < INFECTIOUS DISEASES, Public health < INFECTIOUS DISEASES                                                                                                                                                                                                                                                                                                                                                                                                                                                                                                                                                                                                                                                                                                                                                                                                                                                                                                                                                                                                                                                     |
|                                 |                                                                                                                                                                                                                                                                                                                                                                                                                                                                                                                                                                                                                                                                                                                                                                                                                                                                                                                                                                                                                                                                                                                                                          |

SCHOLARONE™  
Manuscripts





I, the Submitting Author has the right to grant and does grant on behalf of all authors of the Work (as defined in the below author licence), an exclusive licence and/or a non-exclusive licence for contributions from authors who are: i) UK Crown employees; ii) where BMJ has agreed a CC-BY licence shall apply, and/or iii) in accordance with the terms applicable for US Federal Government officers or employees acting as part of their official duties; on a worldwide, perpetual, irrevocable, royalty-free basis to BMJ Publishing Group Ltd ("BMJ") its licensees and where the relevant Journal is co-owned by BMJ to the co-owners of the Journal, to publish the Work in this journal and any other BMJ products and to exploit all rights, as set out in our [licence](#).

The Submitting Author accepts and understands that any supply made under these terms is made by BMJ to the Submitting Author unless you are acting as an employee on behalf of your employer or a postgraduate student of an affiliated institution which is paying any applicable article publishing charge ("APC") for Open Access articles. Where the Submitting Author wishes to make the Work available on an Open Access basis (and intends to pay the relevant APC), the terms of reuse of such Open Access shall be governed by a Creative Commons licence – details of these licences and which [Creative Commons](#) licence will apply to this Work are set out in our licence referred to above.

Other than as permitted in any relevant BMJ Author's Self Archiving Policies, I confirm this Work has not been accepted for publication elsewhere, is not being considered for publication elsewhere and does not duplicate material already published. I confirm all authors consent to publication of this Work and authorise the granting of this licence.

1  
2  
3 **Effectiveness of different types and levels of social distancing measures:**  
4 **a scoping review of global evidence from earlier stage of COVID-19**  
5 **pandemic**  
6  
7  
8  
9

10  
11  
12  
13 Kai-Sing Sun<sup>1#</sup>, Terence See-Man Lau<sup>1#</sup>, Eng-Kiong Yeoh<sup>1\*</sup>, Vincent Chi-Ho Chung<sup>1</sup>, Yin Shan  
14 Leung<sup>1</sup>, Carrie Ho-Kwan Yam<sup>1</sup>, Chi-Tim Hung<sup>1</sup>  
15  
16

17  
18  
19 <sup>1</sup>Centre for Health Systems and Policy Research, The Jockey Club School of Public Health and  
20 Primary Care, The Chinese University of Hong Kong, Hong Kong, China  
21  
22

23  
24 **#Co-first authors**  
25

26  
27 **\*Corresponding author:**  
28

29 Prof Eng-Kiong Yeoh

30 Address: 2/F, School of Public Health Building, Prince of Wales Hospital, Shatin, Hong Kong

31 Email: [yeoh\\_ek@cuhk.edu.hk](mailto:yeoh_ek@cuhk.edu.hk)  
32

33  
34 Tel: (852) 2252 8702 Fax: (852) 2145 7489  
35  
36  
37  
38  
39  
40  
41  
42  
43  
44  
45  
46  
47  
48  
49  
50  
51  
52  
53  
54  
55  
56  
57  
58  
59  
60

## Abstract

**Objective:** Social distancing is one of the main non-pharmaceutical interventions used in the control of the COVID-19 pandemic. This scoping review aims to synthesize research findings on the effectiveness of different types and levels of social distancing measures in the earlier stage of COVID-19 pandemic without the confounding effect of mass vaccination.

**Design:** Scoping review.

**Data sources:** MEDLINE, Embase, Global Health and four other databases were searched for eligible studies on social distancing for COVID-19 published from inception of the databases to 30 September 2020.

**Study selection and data extraction:** Effectiveness studies on social distancing between individuals, school closures, workplace/business closures, public transport restrictions and partial/full lockdown were included. Non-English articles, studies in healthcare settings or not based on empirical data were excluded.

**Results:** After screening 1638 abstracts and 8 additional articles from other sources, 41 studies were included for synthesis of findings. The review found that the outcomes of social distancing measures were mainly indicated by changes in  $R_t$ , incidence and mortality, along with indirect indicators such as daily contact frequency and travel distance. There was adequate empirical evidence for the effect of social distancing at the individual level, and for partial or full lockdown at the community level. However, at the level of social settings, the evidence was moderate for school closure, and was limited for workplace/business closures as single targeted interventions. There was no evidence for a separate effect of public transport restriction.

**Conclusions:** In the community setting, there was stronger evidence on the combined effect of different social distancing interventions than for a single intervention. As fatigue of preventive behaviors is an issue in public health agenda, future studies should analyze the risks in specific settings such as eateries and entertainment to implement and evaluate measures which are proportionate to the risk.

**Keywords:** COVID-19, effectiveness, incidence, scoping review, social distancing

## Strengths and limitations of this study

- First scoping review to synthesize findings on the effectiveness of social distancing measures for COVID-19 at individual, community and national levels and social settings assessed by different outcome parameters.
- This review analyses the level of evidence for different types and levels of social distancing measures.
- Findings in varied outcome parameters could not be compared directly.
- Non-English literature was excluded from this review.

For peer review only

## Introduction

Social distancing is one of the main non-pharmaceutical interventions (NPIs) to control the outbreak of COVID-19 worldwide. Social distancing, also known as physical distancing, is based on the premise that the rate of transmission of infectious diseases will decrease if people in communities stay at home from work or school, avoid large gatherings and refrain from having physical contact with each other. World Health Organization (WHO) guidelines describe social distancing measures at the individual level (e.g. keeping at least one meter from each other) and the community level including stay-at-home recommendation/ordinances and measures in specific socio-economic settings (e.g. workplace, schools, eateries, entertainment and parties) (1, 2). At the national or regional levels, lockdown (also called “community quarantine” to restrict movement of population groups) may be imposed as an extreme form of social distancing (3, 4), where it can be total or partial lockdown to restrict key socio-economic activities (5).

Despite the fact that social distancing measures have become a crucial strategy globally to mitigate COVID-19 pandemic, the evidence for their effectiveness is just slowly accruing. Earlier studies applied mathematical modelling to predict effectiveness of social distancing measures (6-9). Recent studies evaluated the outcomes retrospectively using empirical data and reported the outcomes within specific parameters. A study which analyzed data from 149 countries suggested that implementation of different social distancing interventions was associated with an overall reduction in COVID-19 incidence of 13% (IRR 0.87, 95% CI: 0.85 - 0.89) (10). It concluded that data from 11 countries indicated similar overall effectiveness (pooled IRR 0.85, 0.81 to 0.89) when school closures, workplace closures, and restrictions on mass gatherings were in place (10). The European Centre for Disease Prevention and Control (ECDC) also estimated the effectiveness of different types of social distancing in Europe. While most were based on prediction modelling, some retrospective analyses showed that lockdown reduced  $R_t$  from around 2.7 to 0.6 in the UK (11). Given different types,

1  
2  
3 variations and combinations of social distancing measures were implemented at different levels in  
4  
5 different jurisdictions and pandemic contexts, it is important to study what parameters and methods  
6  
7 were used and what outcomes were measured in various research studies. This is critical in a protracted  
8  
9 pandemic after continuing restrictions to individual movement and socio-economic life, which have  
10  
11 led to fatigue in preventive behaviors. In this context, targeted measures which have been evaluated to  
12  
13 be proportionate to the risks should motivate continuing preventive behaviors.  
14  
15  
16  
17  
18

19 This study aims to synthesize research findings on the effectiveness of different types and levels of  
20  
21 social distancing measures during earlier stage of the COVID-19 pandemic. The study was conducted  
22  
23 as a scoping review to include a broad range of outcome parameters and study designs. This enables a  
24  
25 better understanding of the effectiveness of the spectrum of social distancing measures in controlling  
26  
27 the COVID-19 pandemic.  
28  
29  
30  
31  
32  
33  
34

## 35 **Methods**

36  
37  
38 The scoping review method was applied to include a range of parameters relating to effectiveness of  
39  
40 social distancing measures during the COVID-19 pandemic. In contrast to a systematic review which  
41  
42 answers a specific and narrow question, a scoping review aims to explore a set of emerging and diverse  
43  
44 themes to synthesize the current evidence, clarify conceptual parameters and identify gaps for further  
45  
46 research (12-14).  
47  
48  
49  
50

## 51 **Eligibility criteria**

52  
53  
54 Inclusion criteria for this review were studies that described: 1) effectiveness or outcomes of social  
55  
56 distancing measures targeting the general public; 2) social distancing measures including those  
57  
58 between individuals; targeted measures including closures of schools, workplaces, restaurants, bars  
59  
60

1  
2  
3 and other social settings; stay-at-home recommendation/ ordinances, community quarantine and  
4  
5 lockdown; and 3) quantitative research, secondary data analysis, modelling studies based on empirical  
6  
7 data, and review articles.  
8  
9

10  
11  
12 Exclusion criteria were: 1) qualitative studies, commentaries, mini-reviews without search strategies,  
13  
14 editorials, conference presentations, dissertations, and book chapters); 2) non-English articles; 3)  
15  
16 studies in healthcare settings, such as those on healthcare workers, hospital patients and elderly nursing  
17  
18 homes; 4) studies on the impact of social distancing measures on non-COVID-19 disease management  
19  
20 and psychosocial health of the public; and 5) hypothetical/stimulation models predicting future trends  
21  
22 of incidence.  
23  
24  
25

### 26 27 28 **Search strategies and study selection** 29

30  
31 Seven electronic databases including AMED, Embase, Global Health, MEDLINE, Ovid Nursing  
32  
33 Database, APA PsycInfo, Social Work Abstracts were searched by an experienced team member in  
34  
35 scoping and systematic reviews. The search period was from the inception of the databases to 30  
36  
37 September 2020. To enhance sensitivity, syntax of "*COVID\**".*m\_titl. AND social distan\*.ab* and  
38  
39 "*COVID\**".*m\_titl. AND physical distan\*.ab* were used as search strategies to cover both terms of social  
40  
41 distancing and physical distancing. Additional syntax of "*SARS-CoV-2\**".*m\_titl. and (social distan\**  
42  
43 *or physical distan\*).ab.* were used to search for articles using the keyword 'SARS-CoV-2'. Details are  
44  
45 shown in the supplementary file. Furthermore, backward searches from the reference lists of the  
46  
47 articles were conducted to locate additional articles and reports. The search and selection process  
48  
49 followed the Joanna Briggs Institute Methods Manual for scoping reviews, and the reporting was  
50  
51 guided by PRISMA Extension for Scoping Reviews (PRISMA-ScR)(15). Two reviewers  
52  
53 independently screened the titles and abstracts to assess their eligibility. Full texts of potential citations  
54  
55 were retrieved for detailed examination. Selection discrepancies were settled through discussions  
56  
57  
58  
59  
60



1  
2  
3 between these two reviewers. Any outstanding disagreements were resolved by consulting the third  
4  
5 member. We did not conduct risk of bias assessment, which is consistent with recommendations from  
6  
7 the Joanna Briggs Institute Scoping Review Methods Manual and PRISMA-ScR (15), as different  
8  
9 from a systematic review, a scoping review aims to provide an overview of the existing evidence  
10  
11 comprehensively, regardless of risk of bias of included studies (15).  
12  
13  
14  
15  
16

### 17 **Data extraction and synthesis**

18  
19 For each study included, texts under the headings of ‘results’ or ‘findings’ were extracted and analyzed  
20  
21 by two reviewers. The analysis was performed by one reviewer and verified by a second reviewer. The  
22  
23 two reviewers reached consensus on the outcomes reported and their classification to corresponding  
24  
25 types of social distancing and effectiveness indicators.  
26  
27  
28  
29

### 30 **Patient and public involvement statement**

31  
32 It was not appropriate or possible to involve patients or the public in the design, or conduct, or  
33  
34 reporting, or dissemination plans of our research.  
35  
36  
37  
38

## 39 **Results**

### 40 **Study selection and characteristics**

41  
42 We screened 1638 abstracts from our electronic search on the databases with 2 additional research  
43  
44 reports identified from governmental websites. Of the 120 full texts retrieved for further assessment,  
45  
46 35 articles fulfilled our eligibility criteria. In addition, 6 relevant studies were identified from the  
47  
48 reference lists of the articles through backward searches. Hence, in total, 41 studies were included in  
49  
50 this review. Figure 1 presents results of the literature search and classification flow, and Table 1  
51  
52 provides detailed characteristics of the selected articles.  
53  
54  
55  
56  
57  
58  
59  
60

1  
2  
3 (Insert Figure 1 and Table 1 here)  
4  
5  
6  
7

8 There were 38 research studies and 3 reviews. Fourteen studies reported data from North America,  
9 another 13 from Asia, 12 from Europe, 3 from South America and 2 from Australia. There were also  
10 3 global studies which reported data from over 50 countries in multiple regions. According to the  
11 classification by World Bank, 63.5% of the studies were from high-income countries/regions; 30.8%  
12 and 5.8% were from middle-income and low-income countries/regions respectively.  
13  
14  
15  
16  
17  
18  
19  
20

21 Table 2 summarizes the key findings based on the following effectiveness indicators: 1) Infectivity:  
22  $R_t$ , effective reduction number; 2) Incidence: infection incidence, ratio of incidence rate, attack rate,  
23 or bed occupancy rate; 3) Mortality or fatality rate; 4) Effect time: action and effect duration, time of  
24 reaching peak; 5) Attendance percentage of location, daily vehicles miles, daily contact frequency,  
25 mobility of leaving home, or travel distance. A description of each type of intervention is also given.  
26 A tick “✓” is put if no detailed elaboration was provided in the reviewed articles.  
27  
28  
29  
30  
31  
32  
33  
34  
35  
36  
37

38 (Insert Table 2 here)  
39  
40  
41

### 42 **Social distancing at individual level**

43  
44

45 Social distancing was usually achieved by prohibition of mass gathering in public areas and/ or  
46 maintaining certain physical distance between people. Most studies reported a positive relationship  
47 between the transmission risk and a certain level of social distancing. A meta-analysis including seven  
48 studies on COVID-19 concluded that physical distancing of 1 meter or more was effective in reducing  
49 the transmission risk by 5 times and the protective impact was double for every extra meter (16).  
50 Similarly, based on the chronological data on interventions in 41 countries between January and May  
51 2020, Brauner et al. (17) estimated that  $R_t$  reduced by 36%, 28% and 12% when gatherings were  
52  
53  
54  
55  
56  
57  
58  
59  
60

1  
2  
3 limited to 10, 100 and 1,000 people respectively. Furthermore, studies found how mobility changed  
4 according to different social distancing measures. A study by Weill et al. (18) in the U.S. found that  
5 median distance traveled, retail and recreation locations visited by a mobile device per day showed a  
6 sharp decrease in March 2020 after implementation of social distancing measures in the country, with  
7 the percentage of the population completely staying at home doubled. Similar results showed that a  
8 decline in visits to non-essential businesses following the implementation of social distancing was  
9 associated with a reduction in estimated  $R_t$  (19). In the analysis of 211 US counties, visits to  
10 nonessential businesses reduced by 50% and 70% contributed to a 45% decline in  $R_t$  and a drop of  $R_t$   
11 to a threshold of 1.0 respectively, indicating that the larger the drop in nonessential business visits, the  
12 more significance in the reduction of a  $R_t$  (19). Another US study by Clipman et al. (20), in Maryland,  
13 found that a history of COVID-19 infection was significantly less likely among the public who always  
14 practised social distancing (adjusted OR for indoor social distancing, 0.32 [95% CI, .10–.99]; adjusted  
15 OR for outdoor social distancing, 0.10 [95% CI, .03–.33]), giving indications of the effect of mobility  
16 on the pandemic. It was consistent with the inference by Lemaitre et al. (21) who found a strong support  
17 for changes in  $R_0$  following the mobility decline before implementation of school closure, underlining  
18 the importance of behavior changes on the reductions in transmission. However, social distancing in  
19 different settings may have different impact. The UK Scientific Advisory Group for Emergencies  
20 (SAGE) meeting report (22) suggested that stopping contact from different households would provide  
21 moderate impact by reducing  $R_t$  of 0.1-0.2 but the impact of physical distancing on outdoor gathering  
22 was minimal ( $R_t$  reduction  $<0.05$ ) since good ventilation was usually observed.  
23  
24  
25  
26  
27  
28  
29  
30  
31  
32  
33  
34  
35  
36  
37  
38  
39  
40  
41  
42  
43  
44  
45  
46  
47  
48  
49  
50  
51  
52

## 53 **Social distancing at level of community settings**

### 54 *School closure*

55  
56  
57  
58  
59  
60

1  
2  
3 School closure may have benefits during the pandemic, but the effectiveness was mixed when  
4  
5 considering levels of closures and the unexpected link between school closure and re-opening.  
6  
7 Rivkees's (23) study in Florida of the U.S. found that closing schools resulted in a 40-55% reduction  
8  
9 in average distance traveled compared with pre-outbreak levels. Moreover, Auger et al. (24) found that  
10  
11 the primary and secondary school closure in the U.S. between March and May 2020 was associated  
12  
13 with decreased COVID-19 incidence (adjusted relative change per week, -62%) and mortality (-58%).  
14  
15 On the other hand, the SAGE report (22) suggested that closing secondary schools and further  
16  
17 education could have greater impact, even though a moderate  $R_t$  drop of 0.1 – 0.5 was associated with  
18  
19 mass school closure, as mature students worked in daytime and linked up infection pathways between  
20  
21 workplace and households. It was also observed that states closing schools earlier, when cumulative  
22  
23 incidence of COVID-19 was low, had the largest relative reduction in incidence and mortality,  
24  
25 although there might be confounding effects from other interventions (25). Contrary to expected  
26  
27 impacts of school closures, observational data in ECDC review suggested that re-opening schools had  
28  
29 not been associated with significant increases of community transmission (11). In other studies (26,  
30  
31 27) that focused on the various measures used in educational and children care center settings after  
32  
33 reopening, the results showed low incidence rate in these settings. There was a decreasing trend of  
34  
35 both the average outbreak numbers and the cases per outbreak by school measures and might be  
36  
37 partially due to the extensive measures. Meanwhile, the specific impact of reduction of face-to-face  
38  
39 attendance in classrooms was not assessed (28).  
40  
41  
42  
43  
44  
45  
46  
47  
48  
49

### 50 ***Workplace measures***

51  
52  
53 Workplace measures include work-from-home arrangement, measures in working environment and  
54  
55 closure of businesses. The SAGE report (22) suggested a moderate impact of work-from-home  
56  
57 measure, with a reduction of  $R_t$  between 0.2 and 0.4. Brauner et al. (17) estimated that a 29%  $R_t$   
58  
59  
60

1  
2  
3 reduction was likely to follow with closing most of non-essential businesses, while closing high risk  
4 businesses, e.g. bars and restaurants would be associated with a  $R_t$  decline of 20%. Although there was  
5  
6 limited empirical data on the impact of closure of businesses, reduced visits to nonessential businesses  
7  
8 in the U.S. was associated with a drop in  $R_t$  (19).  
9  
10  
11  
12  
13  
14  
15

### 16 ***Public transport restriction***

17  
18 Public transport restriction refers to suspension/ limitation of intra-city or intercity public  
19 transportation. The SAGE report (22) suggested a low to moderate impact following the 5-mile travel  
20 restriction, especially when local outbreak was widespread. It might be because crowding in public  
21 transport was low and mandated face-mask policy had already been implemented. However, Islam's  
22 study (10) showed no difference in reduction with or without the suspension of public transportation.  
23  
24 On the other hand, ECDC review showed contradictory results, with a modelling study indicating a  
25 strong association with reduction of  $R_t$  while other studies did not show any impact unless introduced  
26 with other NPIs such as social distancing and behavioral changes (11). Therefore, it is difficult to relate  
27 observed changes in transmission dynamics to this single measure of public transport restriction.  
28  
29  
30  
31  
32  
33  
34  
35  
36  
37  
38  
39  
40  
41  
42

### 43 **Social distancing at national/regional level**

#### 44 ***Combination of interventions - partial lockdown***

45  
46 While the studies mentioned above focused on the effect of single type of intervention, many studies  
47 showed the effect of a combination of interventions, which could be regarded as a partial lockdown.  
48  
49 A study by Siedner et al. (25) in the U.S. found that the mean daily COVID-19 case growth rate fell  
50 by 0.9% per day, starting 4 days after implementation of the first statewide social distancing measures  
51 including cancellation of public events, travel restriction, school and workplace closures. In a study by  
52  
53  
54  
55  
56  
57  
58  
59  
60

1  
2  
3 Randhawa et al.(29), the SARS-CoV-2 positivity rate in Seattle-area outpatient clinics and emergency  
4 departments declined from the peak range of 14.3-17.6% to 3.8-3.9% after statewide physical  
5 distancing measures, such as shutdown of bars/restaurants, implementation of social gathering limits  
6 and stay-home orders. A drop of 2% in daily COVID-19-attributed mortality growth rate was also  
7 observed 7 days after the measures were implemented. Similarly, a study by Wan et al. (30) in  
8 Mainland China excluding Hubei (province of Wuhan) found that  $R_t$  had dropped sharply from 3.34  
9 on 20 January 2020 to 0.89 on 31 January 2020 after implementing integrated control strategies. In  
10 Du's study (31) of 58 cities in China, also with a remarkable  $R_t$  reduction, at 54.3%, demonstrating the  
11 effectiveness after the implementation of multiple types of interventions.  
12  
13  
14  
15  
16  
17  
18  
19  
20  
21  
22  
23  
24  
25  
26  
27

### 28 ***Full lockdown***

29  
30 A full lockdown can be viewed as a combination of all measures. Islam et al. (10) reported a  
31 combination of 4 measures, including restrictions on mass gatherings, school closures, workplace  
32 closures, and lockdowns in 32 countries, were associated with decreasing incidence of COVID-19  
33 (pooled incident rate ratio, IRR 0.87, 0.84 to 0.91). Similar declining incidence was observed when  
34 public transport closure was added (pooled IRR 0.85, 0.82 to 0.88; n=72 countries). Other than  
35 incidence reduction, bed occupancy could also be benefited from lockdown measures. In Lino's study  
36 (4), before the lockdown, the bed occupancy rate for referred COVID-19 cases in a tertiary hospital in  
37 Fortaleza of Brazil was over 100% in the beginning of May and reached nearly 140% after 10 days.  
38 The rates decreased to below 100% and 85% at 14 and 23 days respectively after the lockdown.  
39  
40  
41  
42  
43  
44  
45  
46  
47  
48  
49  
50  
51  
52  
53  
54

55 There was more evidence showing the effect of lockdown with various indicators. Zhang et al. (32)  
56 found that an average daily number of contacts per survey participant significantly dropped from 14.6  
57 to 2 and 18.8 to 2.3 in Wuhan and Shanghai respectively during the lockdown period, consistent with  
58  
59  
60

1  
2  
3 the respective trends of mobility data declining at 86.9% and 74.5%. Pan et al. (33) analyzed data from  
4  
5 Wuhan and found that the  $R_t$  gradually reduced from greater than 3 in January 2020 to less than 1 in  
6  
7 February 2020 and fell further to less than 0.3 in March 2020 after the city lockdown. Lim et al. (34)  
8  
9 studied 9 Southeast Asian countries found a large variation in social distancing policies across  
10  
11 countries, leading to marked differences in the reduction in  $R_t$ , with the biggest decrease in Malaysia  
12  
13 from 3.68 to 1.53 and the smallest decrease in Laos from 1.55 to 1.20. Similarly, a brief report from  
14  
15 Rivkees et al. (23) showed that the stay-at-home order in Florida of the U.S., after the first month of  
16  
17 implementation, resulted in a 74% to 82% reduction in person-to-person encounters, 55% in visits to  
18  
19 non-essential venues and 45% in overall distance traveled. After two months of implementing stay-at-  
20  
21 home order, the average distance traveled within the state was also found to decrease by 25-40%.  
22  
23 Further, a modelling study of Brauner et al. (17) gathering data of 41 countries using NPIs estimated  
24  
25 that stay-at-home orders (with exemptions) reduced the mean percentage of  $R_t$  by 10%. Moreover, in  
26  
27 SAGE report (22), it was suggested that country lockdown was impactful and could reduce  $R_t$  from  
28  
29 2.7 to 0.6 while 2-3 week short stay-at-home order had moderate impact in reducing  $R_t$  to below 1. As  
30  
31 with all other measures, the earlier the stay-at-home order was implemented, the higher the impact.  
32  
33  
34  
35  
36  
37  
38  
39  
40

### 41 **Implementation timing and impact on the pandemic curve**

42  
43  
44 Nearly all findings found that a timely implementation of measures could reduce the transmission risk  
45  
46 significantly. The relationships between the timing and the change in rates of daily confirmed-cases  
47  
48 were analyzed with a time-series. Marschner et al. (35) used Australia data to back-project that there  
49  
50 would be a fivefold increase in total infections if social distancing measures were delayed by one week.  
51  
52 Consistently, in Du's study (31), a 1-day delay in implementing the 1st intervention was expected to  
53  
54 prolong an outbreak by 2.41 days. However, earlier lockdown, simulated by Islam et al. (10), showed  
55  
56 a larger reduction in COVID-19 incidence compared with a delayed one after other social distancing  
57  
58  
59  
60



1  
2  
3 interventions were initiated. Another empirical study based on the Oxford COVID-19 Government  
4 Response Tracker (36) tracked  $R_t$  temporally for two weeks following the 100th reported case in 140  
5 countries and observed the median timing of implementation of measures across countries. The study  
6 found that lockdown measures and travel bans can be considered early if they were implemented  
7 around two weeks before the 100<sup>th</sup> case and a week before detecting the first case respectively (36).  
8  
9  
10  
11  
12  
13  
14  
15  
16  
17

18 In addition, social distancing measures had a progressive control impact on the growth rates of daily  
19 confirmed cases, with Courtemanche et al. (37) showing reductions of 5.4%, 6.8%, 8.2% and 9.1%  
20 after 1-5 days, 6-10 days, 11-15 days and 16-20 days, respectively following the roll-out of the  
21 measures. The timing effect was further illustrated by Thu et al. (38) that social distancing  
22 interventions took 1-4 weeks to have an effect on the decline in number of infected cases among the  
23 10 countries studied. Countries with higher growth rates at the beginning might have greater  
24 difficulties in controlling the transmission, and vice versa for those countries with initial lower growth  
25 rates. For example, China, Iran and Turkey, promulgating the most stringent level of social distancing  
26 measures, with initial infection growth rates apparently lower at around 60-70%, had the highest  
27 decline rates at 71%, 51.8% and 50.8% respectively while the U.S. and the U.K., having the highest  
28 initial growth rates (99.9%), experienced significantly lower decline rates of 14.8% and 25.9%  
29 respectively. The result suggested that social distancing measures could be more effective when  
30 introduced earlier under situations with low growth rates.  
31  
32  
33  
34  
35  
36  
37  
38  
39  
40  
41  
42  
43  
44  
45  
46  
47  
48  
49  
50  
51

## 52 Discussion

53  
54  
55 This scoping review covered a board range of social distancing interventions and outcome indicators.  
56  
57 A comparison of the key findings of different levels of measures is shown in Table 3. Outcomes were  
58  
59 mainly indicated by changes in  $R_t$ , incidence and mortality, along with indirect indicators such as daily  
60

1  
2  
3 contact frequency and travel distance. Based on changes in  $R_t$ , incidence and mortality, there was  
4  
5 adequate empirical evidence for the effect of social distancing at the individual level, and for partial  
6  
7 or full lockdown at the community level. However, for targeted measures in social settings, the  
8  
9 evidence was moderate and inconsistent for school closure, and limited for workplace/business  
10  
11 closures. There was no evidence for the effect of public transport restriction alone.  
12  
13  
14  
15  
16

17 (Insert Table 3 here)  
18  
19  
20  
21

22 Many studies reported the combined effects of different social distancing interventions which were  
23  
24 usually implemented as a package of 3-5 measures. Observed impact of a single measure in a social  
25  
26 setting was scarcely reported or only demonstrated with modelling. For example, Islam et al. (10)  
27  
28 reported that among 149 countries studied, 118 countries implemented 5 measures while 29 countries  
29  
30 used 3 to 4 interventions, with only one country introducing 2 measures and the remaining one  
31  
32 implementing a single measure. In addition, even though the lockdown, in this review, was shown with  
33  
34 the highest reduction in  $R_t$ , it had been implemented as multiple measures.  
35  
36  
37  
38  
39

40 Apart from types of interventions, the relationship between implementation time points and the effect  
41  
42 were also investigated. Lam et al. (39) observed an early public health measure promulgation was able  
43  
44 to contain the epidemic in Hong Kong, without initiating extreme measures such as a city-wide  
45  
46 lockdown. Other studies suggested that the effect time variation might be due to the different times  
47  
48 and levels of promulgating the social distancing measures, making the effectiveness apparently  
49  
50 different (38). It could be demonstrated through the comparison between countries that the stronger  
51  
52 the level of social distancing, the faster it took to reduce the number of daily confirmed cases (38).  
53  
54 Furthermore, high initial infection incidence due to late implementation of measures would reduce the  
55  
56 effectiveness of measures (38). All these results indicated a need for a rapid response and stringent  
57  
58  
59  
60

1  
2  
3 measures to win the battle.  
4  
5  
6  
7

## 8 **Contextual factors** 9

10  
11 In addition to the types, levels and timing of social distancing measures highlighted in this review, the  
12 effectiveness of measures was also affected by contextual factors such as compliance, social belief and  
13 cultural factors. Low public compliance may be a key explanation when interventions showed no sign  
14 of flattening of the epidemic curve. The compliance issue was further supported by Cruz's study (40)  
15 in examining the social distancing index (SDI), a social distancing adoption index used by the Brazilian  
16 government found that it needed to be larger than 55% to reduce the daily death number. Moreover,  
17 social belief such as awareness of disease information might cultivate a sense of self-imposed initiation  
18 of handwashing, wearing protectives, keeping a distance from people and reducing outdoor activities.  
19 Cultural factors may also have an influence on public gatherings, although it was too complicated for  
20 a quantitative evaluation of the timing, magnitudes and processes that were prevalent in a region.  
21 Cultural factors were studied in Huynh's study (41) illustrating that countries with higher Uncertainty  
22 Avoidance Index (UAI) predicted a smaller proportion of people gathering in public such as in grocery  
23 and retail stores, pharmacies stores, recreation areas, public transport and workplaces, whereas  
24 countries in the northern European such as Finland, Sweden, and Norway with lower uncertainty  
25 avoidance indices people were unlikely to follow social distancing measures. Further, Islam's study  
26 (10) observed greater case reduction associated with those countries with a higher GDP per capita, a  
27 higher proportion of population aged 65 years or above, and stronger preparedness for the pandemic  
28 measured by the country health security index. Therefore, cultural determinants are likely to play an  
29 important role in compliance with preventive behaviours.  
30  
31  
32  
33  
34  
35  
36  
37  
38  
39  
40  
41  
42  
43  
44  
45  
46  
47  
48  
49  
50  
51  
52  
53  
54  
55  
56  
57  
58  
59  
60

### Knowledge gap for future research

Due to the heterogeneity of the outcomes adopted in the studies, it is difficult to render direct comparison of the changes in  $R_t$  and incidence. Consistent inclusion of these outcomes in studies of similar kinds may allow systematic review and meta-analysis in further studies.

Few studies have investigated the effect of closure of entertainment and eatery settings. The SAGE report (22) suggested that closures of gyms, bars and restaurants were useful since there were environmental risks linked to higher probability of touch surfaces, higher aerosol generation and breathing rates due to aerobic activities. Specifically, the risk in bars and pubs was likely to be higher than many other indoor settings due to close proximity of people, long exposure duration, no wearing of face coverings and talking loudly. Some venues were poorly ventilated, especially in winter. In addition, consumption of alcohol impacts on customers' behaviors. More empirical evidence focusing on the dynamic interaction of the environment, customer behaviors and transmission risks would be beneficial.

Some researchers proposed strategies to be proven by empirical evidence. A circuit breaker, proposed in the SAGE report (22), referring to as a 2-3 week short-time lockdown, could put the epidemic curve back by about 28 days or more. Based on historical evidence from the 1918 flu pandemic, Correia et al. (42) argued that regions taking earlier and aggressive social distancing measures grew faster economically in the post-pandemic period although there were adverse effects on the economy during the pandemic. Thus, predicting the recovery in an economy or a community based on the effectiveness of each intervention would be a continuing concern.

Fatigue of pandemic prevention was seen everywhere during the course of COVID-19 pandemic which may exacerbate the peaks and resurgence following the relaxation of measures and undermine the

1  
2  
3 public acceptance to the advice from authorities. Governments with good risk communication with the  
4  
5 public, hinging on engagement, communication and feedback, would be essential to help individuals  
6  
7 assess and reduce their own risks appropriately. Abel et al. (43) reported that social distancing might  
8  
9 lead to depression and anxiety in some people, which in turn would have an impact on social stability.  
10  
11 Psychological impacts were not only observed on patients, health care workers but also on the overall  
12  
13 population. However, Kim et al. (44) suggested we should routinely provide psychological support  
14  
15 instead of stopping social distancing measures. Future studies should explore the longer-term strategies  
16  
17 for risk communication and risk analysis in specific settings to minimise public fatigue towards social  
18  
19 distancing. Response measures should be proportional to the risk in different settings.  
20  
21  
22  
23  
24  
25  
26

27  
28 Our search period was till 30 September 2020 when vaccine was not available. For mass vaccination  
29  
30 programs which were implemented in most countries after December 2020 (45). The reported number  
31  
32 of cases per population was under 2.3% across countries. Including unreported asymptomatic cases,  
33  
34 population immunity should have still be insignificant during this period. However, this study period  
35  
36 may have an advantage in excluding the confounding effect of population immunity and mass  
37  
38 vaccination on the effects of social distancing measures. Future studies should explore whether the  
39  
40 effect of social distancing declines as the degree of population immunity increases.  
41  
42  
43  
44  
45  
46

## 47 **Limitations**

48  
49  
50 Although a lot of information on the measures taken was collected from government websites,  
51  
52 measures implemented in small localities or regional areas were not widely publicized or difficult to  
53  
54 access, resulting in relevant studies being limited. Moreover, there was a wide variation of testing  
55  
56 accessibility and for the criteria who should be tested, in different countries. Similarly, the points of  
57  
58 time of promulgation and severity level of interventions were different among countries. Therefore,  
59  
60

1  
2  
3 the cumulative confirmed cases might not reflect the actual situation in the population and were not  
4 accurate for comparisons. Using a time series analysis referencing to the date of death but not to the  
5 date of testing might be under a possible variation of case reporting and might delay the reporting  
6 process for as long as 15-days. Another concern is that some studies used mobile device for imputing  
7 people attendance changes in specific times and locations. The drawback was the characteristics of  
8 those persons using mobile devices such as age and gender were unknown. The data only tracked  
9 mobile devices but not persons, who might have multiple devices (e.g., a phone and a tablet), or might  
10 not take their devices when they left home. Hence, the results might not reflect the actual mobility  
11 patterns. Finally, our review excluded non-English literature. The English literature of COVID-19  
12 might be biased towards countries with good research capacity and interests in publishing their  
13 findings for an international audience.  
14  
15  
16  
17  
18  
19  
20  
21  
22  
23  
24  
25  
26  
27  
28  
29  
30

## 31 **Conclusions**

32  
33  
34 Our review showed that the outcomes of social distancing measures were mainly measured by changes  
35 in  $R_t$ , incidence and mortality. There was empirical evidence for the effect of social distancing between  
36 individuals, and for partial or full lockdowns. However, the evidence was moderate for the separate  
37 effect of school closure and limited for workplace/business closures. There was no evidence for the  
38 separate effect of public transport restriction. In the community setting, there was more evidence of  
39 the combined effect of different social distancing interventions than for a single intervention. Apart  
40 from the effectiveness of the interventions, public compliance is another important issue. COVID-19  
41 has been changing our lives and a new norm may emerge as we have to live with new variants of the  
42 virus, which may develop to a situation similar to that of the seasonal flu, where a total elimination is  
43 not the goal. Fatigue of preventive behaviors is on the top of the public health agenda. Community  
44 compliance with social distancing measures is related to the population's attitude to government  
45 policies, access/awareness of trustful sources of information, the initiations and maintenance to self-  
46  
47  
48  
49  
50  
51  
52  
53  
54  
55  
56  
57  
58  
59  
60

1  
2  
3 imposed measures. Therefore, risk communication and risk analysis continue to be of cornerstone of  
4 public health measures and to address research gaps for implementing effective measures which are  
5 targeted and proportionate to the risk in different settings.  
6  
7  
8  
9  
10  
11  
12

### 13 **Figure:**

14  
15 Figure 1. PRISMA flow diagram of literature search and selection  
16  
17

### 18 **Contributors**

19  
20 EKY designed the study, applied for the grant and made major contributions to writing the manuscript.  
21 VCHC, EKY, KSS and CTH managed the review methodology. TSML, KSS and YSL conducted the  
22 review and data synthesis. TSML, KSS, EKY, CHKY and CTH wrote the first draft of the manuscript.  
23 All authors read, revised and approved the final manuscript.  
24  
25  
26  
27

### 28 **Funding**

29  
30 This study was funded by Commissioned Research on the Novel Coronavirus Disease (Ref.:  
31 COVID190105) of the Health and Medical Research Fund, Food and Health Bureau, Hong Kong SAR  
32 Government. The funder had no role in the study design, collection, analysis, and interpretation of  
33 data, or in writing the manuscript.  
34  
35  
36  
37

### 38 **Acknowledgement**

39  
40 The Centre for Health Systems and Policy Research funded by The Tung Foundation is acknowledged  
41 for the support throughout the conduct of this study.  
42  
43  
44

### 45 **Competing interests**

46  
47 The authors declare that they have no competing interests.  
48  
49

### 50 **Ethics approval**

51  
52 Ethical approval was obtained from the Survey and Behavioural Research Ethics Committee of the  
53 Chinese University of Hong Kong (Ref no. SBRE-19-595).  
54  
55

### 56 **Consent for publication**

57  
58 Not applicable.  
59

### 60 **Data sharing statement**



1  
2  
3 The datasets used and/or analyzed during the current study are available from the corresponding author  
4 on reasonable request.  
5  
6  
7  
8  
9  
10  
11  
12  
13  
14  
15  
16  
17  
18  
19  
20  
21  
22  
23  
24  
25  
26  
27  
28  
29  
30  
31  
32  
33  
34  
35  
36  
37  
38  
39  
40  
41  
42  
43  
44  
45  
46  
47  
48  
49  
50  
51  
52  
53  
54  
55  
56  
57  
58  
59  
60

For peer review only

**Table 1 Article characteristics (n=41)**

|                                               |                         | Count (%) |
|-----------------------------------------------|-------------------------|-----------|
| <b>Countries/ cities by geographic region</b> |                         |           |
|                                               | Asia                    | 13 (27.7) |
|                                               | Australia & New Zealand | 2 (4.3)   |
|                                               | Europe                  | 12 (25.5) |
|                                               | North America           | 14 (29.8) |
|                                               | South America           | 3 (6.4)   |
|                                               | Global studies          | 3 (6.4)   |
| <b>Country economy<sup>#</sup></b>            |                         |           |
|                                               | High income             | 33 (63.5) |
|                                               | Middle income           | 16 (30.8) |
|                                               | Low income              | 3 (5.8)   |
| <b>Article type</b>                           |                         |           |
|                                               | Research article        | 38 (92.7) |
|                                               | Review article          | 3 (7.3)   |

<sup>#</sup>Country economy level according to The World Bank's classification.

Table 2 Effectiveness and outcomes of social distancing measures

| Article and Study Characteristics                                                                                                           |                                      | Type of Social Distancing Measures    |                                                    |                                                                                              |                              |                                             |        | Effectiveness Indicators                                                                                                                                                                                                                                                                                                                                                                                                                               |
|---------------------------------------------------------------------------------------------------------------------------------------------|--------------------------------------|---------------------------------------|----------------------------------------------------|----------------------------------------------------------------------------------------------|------------------------------|---------------------------------------------|--------|--------------------------------------------------------------------------------------------------------------------------------------------------------------------------------------------------------------------------------------------------------------------------------------------------------------------------------------------------------------------------------------------------------------------------------------------------------|
| Authors; article type; study period/publication date; study design                                                                          | Country/region; economy level        | Social distancing between individuals | School measure / closure                           | Workplace measure / closure                                                                  | Public transport restriction | Stay-at-home recommendation / ordinances    | Others | <b>Infectivity:</b> $R_t$ , effective reduction number<br><b>Incidence:</b> Incidence, incidence rate, attack rate, bed occupancy rate<br><b>Mortality:</b> Mortality or fatality rate<br><b>Effect time:</b> Action and effect duration, time of reaching peak<br><b>Attendance:</b> Attendance % of location, daily vehicles miles, daily contact frequency, mobility of leaving home, travel distance                                               |
| Auger et al.(24)<br>Research article;<br>9/3/2020-7/5/2020;<br>Population-based observational study of changes in incidence and mortality   | The US;<br>High                      |                                       | Statewide closure of primary and secondary schools |                                                                                              |                              |                                             |        | <b>(Incidence &amp; mortality):</b> Primary and secondary school closure in the US between March and May 2020 was associated with decreased COVID-19 incidence (adjusted relative change per week, -62%) and mortality (-58%). States that closed schools earlier, when cumulative incidence of COVID-19 was low, had the largest relative reduction in incidence and mortality, although there might be confounding effects from other interventions. |
| Brauner et al. (17).<br>Research article;<br>22/1/2020-30/5/2020;<br>Modelling study based on national case and death counts                | Members of the EU countries;<br>High | Limiting size of gathering            |                                                    | Closing most of non-essential businesses and high-risk businesses, e.g. bars and restaurants |                              |                                             |        | <b>(Infectivity):</b> 41 countries-pooled data showed $R_t$ reduction of 36% when gatherings were limited to 10 people or below; 28% when 100 or below and 13% when 1,000 or below. A 29% $R_t$ reduction came with closing most of non-essential businesses while 20% was found when closing high risk businesses, e.g., bars and restaurants.                                                                                                        |
| Castaneda-Babarro et al. (46);<br>Research article;<br>23/3/2020-1/4/2020;<br>Cross-sectional survey on 800 general public for walking time | Spain;<br>High                       | ✓                                     | Forced e-learning                                  |                                                                                              | Restricted travel            | Country lockdown with stay-at-home measures |        | <b>(Attendance):</b> Self-reported walking time decreased by 58.2% during confinement.                                                                                                                                                                                                                                                                                                                                                                 |
| Clipman et al. (20);<br>Research article;<br>17-28/6/2020                                                                                   | Maryland, the US;<br>High            | ✓                                     |                                                    |                                                                                              |                              |                                             |        | <b>(Incidence):</b> Multivariable analysis found that history of SARS-CoV-2 infection was significantly less common among those who always practiced social distancing (aOR for                                                                                                                                                                                                                                                                        |

| Article and Study Characteristics                                                                    |                                | Type of Social Distancing Measures                      |                          |                                                                  |                                                        |                                          |                        | Effectiveness Indicators                                                                                                                                                                                                                                                                                                                                                                                                                                                       |
|------------------------------------------------------------------------------------------------------|--------------------------------|---------------------------------------------------------|--------------------------|------------------------------------------------------------------|--------------------------------------------------------|------------------------------------------|------------------------|--------------------------------------------------------------------------------------------------------------------------------------------------------------------------------------------------------------------------------------------------------------------------------------------------------------------------------------------------------------------------------------------------------------------------------------------------------------------------------|
| Authors; article type; study period/ publication date; study design                                  | Country/ region; economy level | Social distancing between individuals                   | School measure / closure | Workplace measure / closure                                      | Public transport restriction                           | Stay-at-home recommendation / ordinances | Others                 | <b>Infectivity:</b> $R_t$ , effective reduction number<br><b>Incidence:</b> Incidence, incidence rate, attack rate, bed occupancy rate<br><b>Mortality:</b> Mortality or fatality rate<br><b>Effect time:</b> Action and effect duration, time of reaching peak<br><b>Attendance:</b> Attendance % of location, daily vehicles miles, daily contact frequency, mobility of leaving home, travel distance                                                                       |
| Cross-sectional survey on 1,030 general public for infection history and social distancing behaviors |                                |                                                         |                          |                                                                  |                                                        |                                          |                        | indoor social distancing, 0.32 [95% CI, .10–.99]; aOR for outdoor social distancing, 0.10 [95% CI, .03–.33].                                                                                                                                                                                                                                                                                                                                                                   |
| Cruz (40); Research article; 15/3 to 5/4/2020; Time series analysis of death counts                  | São Paulo City, Brazil; Middle | ✓                                                       | Mandatory closure        | Work-from-home and mandatory closure of non-essential businesses |                                                        |                                          |                        | <b>(Mortality):</b> Correlating daily death number with Social Distancing Index (SDI) was derived from government websites. SDI was between 52% and 56%, crossing the break-even point of death number (from 0.82 to -0.4). SDI larger than 55% is needed to reduce death number.                                                                                                                                                                                              |
| Courtemanche et al. (37) Research article; 1/3 – 27/4/2020; Analysis of growth rate of cases         | The US; High                   | Ban on large social gathering with a limit of 50 people | Public school closure    | Closing entertainment businesses                                 |                                                        | Shelter-in-place order (last policy)     |                        | <b>(Incidence):</b> Growth rate of daily confirmed cases reduced by 5.4% after 1-5 days, 6.8% after 6-10 days, 8.2% after 11-15 days, 9.1% after 16-20 days. The number of confirmed cases was 10 times greater without shelter-in-place order and 35 times greater without 4 types of social distancing measures.                                                                                                                                                             |
| Du et al.(31); Research article; 1/1 - 15/2/2020; Analysis of case data from online reports          | 58 cities of China; Middle     | Ban on public gathering                                 | ✓                        | Closing shopping malls, restaurants and entertainment businesses | Suspension of intracity and intercity public transport | ✓                                        | Testing                | <b>(Infectivity):</b> $R_t$ declined by an average of 54.3% (+/- 17.6%) during the containment period.<br><b>(Effect time):</b> The mean time until successful containment was 21 days after the 1st reported case and 8 days following the initiation of interventions. During the period of containment, the $R_t$ declined by an average of 54.3%. A delay of 1 day in implementing the 1st intervention is expected to prolong an outbreak by 2.41 days (95% CI 0.96–3.86) |
| Ehrhardt et al.(27); Research letter;                                                                | Germany; High                  |                                                         | 50% class size           |                                                                  |                                                        |                                          | Enhance ventilation of | <b>(Incidence):</b> The infection for children aged 0-19 was 3.3% among all settings,                                                                                                                                                                                                                                                                                                                                                                                          |

| Article and Study Characteristics                                                                                                             |                                | Type of Social Distancing Measures    |                                                                                                                                                      |                             |                              |                                          |                                                                                                                                                                                                                | Effectiveness Indicators                                                                                                                                                                                                                                                                                                                                                                                 |
|-----------------------------------------------------------------------------------------------------------------------------------------------|--------------------------------|---------------------------------------|------------------------------------------------------------------------------------------------------------------------------------------------------|-----------------------------|------------------------------|------------------------------------------|----------------------------------------------------------------------------------------------------------------------------------------------------------------------------------------------------------------|----------------------------------------------------------------------------------------------------------------------------------------------------------------------------------------------------------------------------------------------------------------------------------------------------------------------------------------------------------------------------------------------------------|
| Authors; article type; study period/ publication date; study design                                                                           | Country/ region; economy level | Social distancing between individuals | School measure / closure                                                                                                                             | Workplace measure / closure | Public transport restriction | Stay-at-home recommendation / ordinances | Others                                                                                                                                                                                                         | <b>Infectivity:</b> $R_t$ , effective reduction number<br><b>Incidence:</b> Incidence, incidence rate, attack rate, bed occupancy rate<br><b>Mortality:</b> Mortality or fatality rate<br><b>Effect time:</b> Action and effect duration, time of reaching peak<br><b>Attendance:</b> Attendance % of location, daily vehicles miles, daily contact frequency, mobility of leaving home, travel distance |
| 25/5/20-25/8/20<br>Analysis of COVID-19 cases aged 0–19 years who attended schools / childcare facilities                                     |                                |                                       | reduction, cancelling physical education lesson, physical distancing between children                                                                |                             |                              |                                          | rooms, policy for sick students to stay at home, facemask wearing, suspension of singing or use of wind instruments during music lesson, promoting hand hygiene, cough etiquette, cleaning of contact surfaces | suggesting child-to-child transmission in schools and childcare facilities was uncommon and not the primary cause of SARS-CoV-2 infection in children. It might be partially due to the infection control measures initiated after school/child-care-facility reopening.                                                                                                                                 |
| Otte et al.(26);<br>Research letter;<br>28/1/20 – 31/8/20<br>Analysis of COVID-19 data on school outbreaks using national surveillance system | Germany;<br>High               |                                       | Opening school for specific grades, staggering timetables, alternating between remote and on-site teaching, restricting class size, keeping distance |                             |                              |                                          | Policies for sick students and staff to stay home, enhanced hand hygiene, wearing face masks, ventilation of rooms, respiratory etiquette                                                                      | <b>(Incidence):</b> The average number of outbreaks and of cases per outbreak was smaller after reopening of schools (2.2 outbreaks/week and 4 cases/ outbreak) than before school closure (3.3 outbreaks/week and 6 cases/outbreak).                                                                                                                                                                    |

| Article and Study Characteristics                                                                             |                                | Type of Social Distancing Measures                                                                                                                      |                          |                                                  |                              |                                          |                                  | Effectiveness Indicators                                                                                                                                                                                                                                                                                                                                                                                                                                                                                                                                                                                |
|---------------------------------------------------------------------------------------------------------------|--------------------------------|---------------------------------------------------------------------------------------------------------------------------------------------------------|--------------------------|--------------------------------------------------|------------------------------|------------------------------------------|----------------------------------|---------------------------------------------------------------------------------------------------------------------------------------------------------------------------------------------------------------------------------------------------------------------------------------------------------------------------------------------------------------------------------------------------------------------------------------------------------------------------------------------------------------------------------------------------------------------------------------------------------|
| Authors; article type; study period/ publication date; study design                                           | Country/ region; economy level | Social distancing between individuals                                                                                                                   | School measure / closure | Workplace measure / closure                      | Public transport restriction | Stay-at-home recommendation / ordinances | Others                           | <b>Infectivity:</b> $R_t$ , effective reduction number<br><b>Incidence:</b> Incidence, incidence rate, attack rate, bed occupancy rate<br><b>Mortality:</b> Mortality or fatality rate<br><b>Effect time:</b> Action and effect duration, time of reaching peak<br><b>Attendance:</b> Attendance % of location, daily vehicles miles, daily contact frequency, mobility of leaving home, travel distance                                                                                                                                                                                                |
|                                                                                                               |                                |                                                                                                                                                         | between students         |                                                  |                              |                                          |                                  |                                                                                                                                                                                                                                                                                                                                                                                                                                                                                                                                                                                                         |
| Huynh (41); Research article; 16/2 - 29/3/2020; Analysis of data from community mobility reports              | 58 countries; Low to high      | Social distancing in:<br>1. retail and recreation<br>2. grocery and pharmacy<br>3.parks<br>4. transit stations<br>5. workplaces<br>6. residential areas |                          |                                                  |                              |                                          |                                  | <b>(Attendance):</b> Attendance in percentage change of specific locations was reported. Countries with higher Uncertainty Avoidance Index (UAI) predicted lower proportion of people gathering in public such as retail and recreation, grocery and pharmacy, parks, transit stations, workplaces. Northern Europe (Finland, Sweden & Norway) with lower UAI was unlikely to commit to social distancing. The cultural determinants played an important role in controlling infection behaviour.                                                                                                       |
| Islam et al. (10); Research article; 1/1– 30/5/2020; Natural experiment with interrupted time series analysis | 149 countries; Low to High     | Restriction of mass gathering and public events                                                                                                         | School closure           | Workplace closure                                | Public transport closure     | Movement Lockdown                        |                                  | <b>(Incidence):</b> Overall, with any intervention, there was 13% reduction in incidence. Data suggested similar effectiveness when school closures, workplace closures, and restrictions on mass gatherings were in place. Earlier lockdown was associated with a larger reduction compared with a delay after other interventions were in place. A combination of 4 measures including restrictions on mass gatherings, school closures, workplace closures, and lockdowns in 32 countries was associated with decreasing incidence of COVID-19 (pooled incident rate ratio, IRR 0.87, 0.84 to 0.91). |
| Jarvis et al.; (47) Research article; 24/3-27/3/2020;                                                         | The UK; High                   |                                                                                                                                                         | School closure           | Limiting time at work, having work closed and/or |                              |                                          | Quarantine and isolation isolate | <b>(Attendance):</b> A 74% reduction in the average daily number of contacts was observed per participant (from 10.8 to 2.8). It was expected to be sufficient to                                                                                                                                                                                                                                                                                                                                                                                                                                       |

| Article and Study Characteristics                                                                                                |                                                                                     | Type of Social Distancing Measures    |                          |                                                  |                                                                                                              |                                          |                                                               | Effectiveness Indicators                                                                                                                                                                                                                                                                                                                                                                                                                                                            |
|----------------------------------------------------------------------------------------------------------------------------------|-------------------------------------------------------------------------------------|---------------------------------------|--------------------------|--------------------------------------------------|--------------------------------------------------------------------------------------------------------------|------------------------------------------|---------------------------------------------------------------|-------------------------------------------------------------------------------------------------------------------------------------------------------------------------------------------------------------------------------------------------------------------------------------------------------------------------------------------------------------------------------------------------------------------------------------------------------------------------------------|
| Authors; article type; study period/ publication date; study design                                                              | Country/ region; economy level                                                      | Social distancing between individuals | School measure / closure | Workplace measure / closure                      | Public transport restriction                                                                                 | Stay-at-home recommendation / ordinances | Others                                                        | <b>Infectivity:</b> $R_t$ , effective reduction number<br><b>Incidence:</b> Incidence, incidence rate, attack rate, bed occupancy rate<br><b>Mortality:</b> Mortality or fatality rate<br><b>Effect time:</b> Action and effect duration, time of reaching peak<br><b>Attendance:</b> Attendance % of location, daily vehicles miles, daily contact frequency, mobility of leaving home, travel distance                                                                            |
| Cohort survey on 1356 general public to report daily number of contacts                                                          |                                                                                     |                                       |                          | not visiting work                                |                                                                                                              |                                          |                                                               | reduce $R_0$ from 2.6 before the lockdown to 0.62 (95% confidence interval [CI] 0.37–0.89) after the lockdown, based on all types of contact and 0.37 (95% CI = 0.22–0.53) for physical contacts only.                                                                                                                                                                                                                                                                              |
| Lemaitre et al.(21)<br>Research article;<br>24/2/2020-<br>24/4/2020<br>Modelling study using data on hospitalizations and deaths | Switzerland;<br>High                                                                | Ban on gathering                      | School closure           | Closure of nonessential activities               |                                                                                                              |                                          |                                                               | <b>(Infectivity):</b> Strong support for changes in $R_0$ following the mobility decline which happened before school closure (national-level mean probability across activities 0.70, cantonal range 0.55–0.99),<br><br>High correlation between changes in $R_0$ and changes in mobility were found, with the strongest associations shown in mobility to work, transit stations, retail and recreation, and residential (cross-correlations >0.9 in all cantons and nationally). |
| Juni et al.(48);<br>Research article;<br>7– 13/3/2020;<br>Prospective cohort study for incidence                                 | 144 countries;<br>Low to High                                                       | Gathering of any size                 | ✓                        | Closing restaurants, bars, or non-grocery stores |                                                                                                              |                                          |                                                               | <b>(Incidence):</b> A rate ratio comparing the cumulative count of confirmed COVID-19 cases with that of previous week was reported. There was strong association of epidemic growth with mass gathering (RRR 0.65, 95% CI 0.53-0.79), school closure (RRR 0.63, 95% CI 0.57-0.78), business closure (RRR 0.62, 95% CI 0.45-0.85).                                                                                                                                                  |
| Khanna et al.(49);<br>Review;<br>Published on 10 April 2020;                                                                     | China, HK, Singapore, South Korea, US, Italy, Spain, Iran and India; Middle to High |                                       |                          |                                                  | All transports in and out of Hubei were prohibited, with each citizen being allowed to go out for 30 minutes | 3-week lockdown in Hubei                 | Quarantine of mild and asymptomatic cases for China Travelers | <b>(Infectivity):</b> China $R_t$ reduced from 2.35 to 1.05 during the period of 16/1/2020–30/1/2020.<br><b>(Effect time):</b> China slowed the dispersal of infection to other cities by 2.91 days and increased the doubling time from 2 to 4 days.<br>Other Chinese cities implementing preventive control measures earlier were                                                                                                                                                 |



| Article and Study Characteristics                                                                                                                                                 |                                | Type of Social Distancing Measures                                 |                                 |                             |                              |                                          |                                                                                                         | Effectiveness Indicators                                                                                                                                                                                                                                                                                                                                                                                 |
|-----------------------------------------------------------------------------------------------------------------------------------------------------------------------------------|--------------------------------|--------------------------------------------------------------------|---------------------------------|-----------------------------|------------------------------|------------------------------------------|---------------------------------------------------------------------------------------------------------|----------------------------------------------------------------------------------------------------------------------------------------------------------------------------------------------------------------------------------------------------------------------------------------------------------------------------------------------------------------------------------------------------------|
| Authors; article type; study period/ publication date; study design                                                                                                               | Country/ region; economy level | Social distancing between individuals                              | School measure / closure        | Workplace measure / closure | Public transport restriction | Stay-at-home recommendation / ordinances | Others                                                                                                  | <b>Infectivity:</b> $R_t$ , effective reduction number<br><b>Incidence:</b> Incidence, incidence rate, attack rate, bed occupancy rate<br><b>Mortality:</b> Mortality or fatality rate<br><b>Effect time:</b> Action and effect duration, time of reaching peak<br><b>Attendance:</b> Attendance % of location, daily vehicles miles, daily contact frequency, mobility of leaving home, travel distance |
|                                                                                                                                                                                   |                                |                                                                    |                                 |                             | every two days               |                                          |                                                                                                         | reported 33.3% fewer cases in the first week of their outbreaks compared with that of cities starting the control later.                                                                                                                                                                                                                                                                                 |
| Koh, et al. (36); Research report; 1/1/2020-28/5/2020<br>Analysis of effect of measures indicated by $R_t$                                                                        | 142 countries; Low to High     | Cancellation of public events, restrictions on size of gatherings, | ✓                               | Closure of workplace        | Closures of public transport | Stay-at-home order                       | Restrictions on internal movements/ international travel                                                | <b>(Infectivity):</b> Following the 100 <sup>th</sup> case, it was found effective that complete travel bans and all forms of lockdown-type measures reduced average $R_t$ over the 14 days. Stay-at-home recommendation and partial lockdowns were as effective as complete lockdowns when controlling the outbreaks. However, these measures were effective when it could be implemented early.        |
| Macartney et al.(28); Research article; 25/1/20-10/4/20.<br>Analysis of confirmed cases in children and staff who attended schools or early childhood education and care settings | Australia; High                |                                                                    | Reduced face-to-face attendance |                             |                              |                                          |                                                                                                         | <b>(Incidence):</b> Although the attack rate of secondary cases was 0.5% in schools, it was unable to assess the effect on transmission regarding hygiene or physical distancing used in educational settings                                                                                                                                                                                            |
| Lai et al. (50); Research article; 23/1 – 1/3/2020;<br>Epidemiological study analyzing government information of the confirmed cases                                              | Hong Kong; High                |                                                                    | ✓                               | Work from home              |                              |                                          | Border Control<br>• Phases 1-3: (18/1-7/2)<br>• Phase 4: (8-29/2)<br><br>Mandatory quarantine for China | <b>(Infectivity):</b> Median $R_t$ dropped from 1.07 to 0.75 with border control in phase 4 (8–29/2/2020).                                                                                                                                                                                                                                                                                               |

| Article and Study Characteristics                                                                                                                                                                                                |                                                                                       | Type of Social Distancing Measures    |                                   |                                                   |                                                                  |                                          |                                                                               | Effectiveness Indicators                                                                                                                                                                                                                                                                                                                                                                                                                                                                                                                                                                                                                      |
|----------------------------------------------------------------------------------------------------------------------------------------------------------------------------------------------------------------------------------|---------------------------------------------------------------------------------------|---------------------------------------|-----------------------------------|---------------------------------------------------|------------------------------------------------------------------|------------------------------------------|-------------------------------------------------------------------------------|-----------------------------------------------------------------------------------------------------------------------------------------------------------------------------------------------------------------------------------------------------------------------------------------------------------------------------------------------------------------------------------------------------------------------------------------------------------------------------------------------------------------------------------------------------------------------------------------------------------------------------------------------|
| Authors; article type; study period/ publication date; study design                                                                                                                                                              | Country/ region; economy level                                                        | Social distancing between individuals | School measure / closure          | Workplace measure / closure                       | Public transport restriction                                     | Stay-at-home recommendation / ordinances | Others                                                                        | <b>Infectivity:</b> $R_t$ , effective reduction number<br><b>Incidence:</b> Incidence, incidence rate, attack rate, bed occupancy rate<br><b>Mortality:</b> Mortality or fatality rate<br><b>Effect time:</b> Action and effect duration, time of reaching peak<br><b>Attendance:</b> Attendance % of location, daily vehicles miles, daily contact frequency, mobility of leaving home, travel distance                                                                                                                                                                                                                                      |
|                                                                                                                                                                                                                                  |                                                                                       |                                       |                                   |                                                   |                                                                  |                                          | travelers in phase 4                                                          |                                                                                                                                                                                                                                                                                                                                                                                                                                                                                                                                                                                                                                               |
| Lam et al.(39); Research article; 1/1 – 31/5/2020; Epidemiological study analyzing the changes in daily number of confirmed cases                                                                                                | Hong Kong; High                                                                       | Cancellation of large-scale events    | School suspension from phases 1-4 | Work from home for civil servants in phases 1 & 2 |                                                                  |                                          | Entry restriction / quarantine for inbound travelers and asymptomatic testing | <b>(Mortality):</b> Case fatality ratio (0.4%) was much lower than global ones during the same period in WHO (6.1%).                                                                                                                                                                                                                                                                                                                                                                                                                                                                                                                          |
| Lasry et al.(51); Research article; 26/2 – 1/4/2020<br>Descriptive analysis using types and timing of mitigation interventions, cumulative number of reported cases, percentage change in confirmed cases and community mobility | 4 US metropolitan areas: San Francisco, Seattle; New Orleans, and New York City; High | Ban on gathering of certain size      | School closure                    | Restrictions on businesses                        |                                                                  | Stay-at-home orders (last policy)        | States of Emergency (1 <sup>st</sup> policy)                                  | <b>(Attendance):</b> Mobility of leaving home was reported. In four localities, the percentage leaving home was close to 80% on February 26, and decreased to 42% in New York City, 47% in San Francisco, 52% in Seattle, and 61% in New Orleans on April 1. Mobility did not decline following the state of emergency alone but a combination of policies such as gathering restrictions or school closures and further decreased after stay-at-home orders.<br><br><b>(Incidence):</b> 3-day average percentage change in cumulative case count showed a decreasing trend by the last 2 weeks of March after a set of policies implemented. |
| Lino et al. (4); Research article; 1-31/5/2020<br>Observational study on bed occupation rates in a hospital following lockdown                                                                                                   | Fortaleza (state capital city), Ceará, Brazil; Middle                                 | ✓                                     |                                   | Suspension of commercial activities               | Restricted daytime movements and interruption of intercity trips | City lockdown, night curfews             |                                                                               | <b>(Incidence)</b> Bed occupancy rates in a tertiary hospital for referred COVID-19 cases were higher than 100% before the lockdown and reached nearly 140% 2 days after. The rate decreased to below 100% 14 days after the lockdown (viral incubation period) and dropped to about 85% 23 days after the lockdown onset.                                                                                                                                                                                                                                                                                                                    |

| Article and Study Characteristics                                                                                                                          |                                                                                                                                                 | Type of Social Distancing Measures                                                |                           |                                                                                  |                                                                                                                 |                                                |                                                                    | Effectiveness Indicators                                                                                                                                                                                                                                                                                                                                                                                 |
|------------------------------------------------------------------------------------------------------------------------------------------------------------|-------------------------------------------------------------------------------------------------------------------------------------------------|-----------------------------------------------------------------------------------|---------------------------|----------------------------------------------------------------------------------|-----------------------------------------------------------------------------------------------------------------|------------------------------------------------|--------------------------------------------------------------------|----------------------------------------------------------------------------------------------------------------------------------------------------------------------------------------------------------------------------------------------------------------------------------------------------------------------------------------------------------------------------------------------------------|
| Authors; article type; study period/ publication date; study design                                                                                        | Country/ region; economy level                                                                                                                  | Social distancing between individuals                                             | School measure / closure  | Workplace measure / closure                                                      | Public transport restriction                                                                                    | Stay-at-home recommendation / ordinances       | Others                                                             | <b>Infectivity:</b> $R_t$ , effective reduction number<br><b>Incidence:</b> Incidence, incidence rate, attack rate, bed occupancy rate<br><b>Mortality:</b> Mortality or fatality rate<br><b>Effect time:</b> Action and effect duration, time of reaching peak<br><b>Attendance:</b> Attendance % of location, daily vehicles miles, daily contact frequency, mobility of leaving home, travel distance |
| Lim et al. (34); Research article; 15/2/20-9/5/20. Analysis of COVID-19 case counts from each Southeast Asian country collected from open web source       | 9 Southeast countries including Cambodia, Indonesia, Laos, Malaysia, Myanmar, the Philippines, Singapore, Thailand and Viet Nam; Middle to High | No social gathering or with people limit, 1-2 m physical distance in public place | Close schools             | Close of non-essential business, work from home                                  | No or limited capacity of public transport, healthcare declaration forms required, no interstate transportation | Stay-at-home order, curfew from 10pm to 4am    | Broader closure, mandatory masking in public place                 | <b>(Incidence):</b> Average daily incidence declined gradually for all countries except the Philippines and Laos.<br><b>(Infectivity):</b> A large variation in $R_t$ reduction, with the biggest decrease in Malaysia from 3.68 (95% CrI 3.47–3.91) to 1.53 (1.44–1.61) and the smallest decrease in Laos from 1.55 (1.04–2.08) to 1.20 (0.84–1.56).                                                    |
| Marschner (35); Research article; 25/1 – 8/5/2020 Back-projection study analyzing the probability distribution of the time between infection and diagnosis | Australia; High                                                                                                                                 | Stage 2: limiting gathering of 2 people (26-31 March)                             |                           | Stage 1: prohibited face-to-face meeting and entertainment activities (23 March) |                                                                                                                 | Stage 3: prohibited leaving home (26-31 March) | Border control (20 March)                                          | <b>(Effect time):</b> It was estimated that one week delay in control measures would lead to an almost fivefold increase in total infections but one week earlier control would reduce total infections of similar magnitude.                                                                                                                                                                            |
| Munayco et al.(52); Research article; 23/1– 9/5/2020 Modelling study using the daily number of confirmed cases by                                          | Peru; Middle                                                                                                                                    | Ban on gathering of larger than 300 people on 12 March                            | School measure since 11/3 |                                                                                  |                                                                                                                 |                                                | Closing country border, National Emergency Declaration on 16 March | <b>(Incidence):</b> Before the implementation of social distancing measures in Lima, the mean scaling of growth parameter, $p$ , was estimated at 0.9 and the reproduction number at 2.3. School closures and other social distancing interventions slowed down the spread of the novel coronavirus, shifting the exponential growth trend to an                                                         |

| Article and Study Characteristics                                                                                                                                                           |                                | Type of Social Distancing Measures    |                                      |                                                    |                              |                                          |                                                                       | Effectiveness Indicators                                                                                                                                                                                                                                                                                                                                                                                 |
|---------------------------------------------------------------------------------------------------------------------------------------------------------------------------------------------|--------------------------------|---------------------------------------|--------------------------------------|----------------------------------------------------|------------------------------|------------------------------------------|-----------------------------------------------------------------------|----------------------------------------------------------------------------------------------------------------------------------------------------------------------------------------------------------------------------------------------------------------------------------------------------------------------------------------------------------------------------------------------------------|
| Authors; article type; study period/ publication date; study design                                                                                                                         | Country/ region; economy level | Social distancing between individuals | School measure / closure             | Workplace measure / closure                        | Public transport restriction | Stay-at-home recommendation / ordinances | Others                                                                | <b>Infectivity:</b> $R_t$ , effective reduction number<br><b>Incidence:</b> Incidence, incidence rate, attack rate, bed occupancy rate<br><b>Mortality:</b> Mortality or fatality rate<br><b>Effect time:</b> Action and effect duration, time of reaching peak<br><b>Attendance:</b> Attendance % of location, daily vehicles miles, daily contact frequency, mobility of leaving home, travel distance |
| date of symptoms onset                                                                                                                                                                      |                                |                                       |                                      |                                                    |                              |                                          |                                                                       | approximately linear growth trend, with the scaling of growth parameter being reduced to 0.53.                                                                                                                                                                                                                                                                                                           |
| Pan et al.(33); Research article; 8/12/2019–8/3/2020<br>Cohort study on data of 32 583 patients                                                                                             | China Wuhan; Middle            | Social distancing                     |                                      |                                                    | Traffic restriction          | Cordons sanitaire                        | Universal symptom survey, home and centralized quarantine             | <b>(Infectivity):</b> A reduction of $R_t$ from larger than 3 in January to less than 1.0 on February 6 and then less than 0.3 in March after implementation of measures by different phases.                                                                                                                                                                                                            |
| Patel P et al.(53); Research article; 30/1– 4/5/2020<br>Epidemiology study using the growth rate of confirmed cases                                                                         | India; Middle                  | ✓                                     | ✓                                    | ✓                                                  |                              | Lockdown since 25 March                  | progressive travel restriction, health promotion and enhanced testing | <b>(infectivity):</b> A decline in $R_t$ following NPIs implementation was observed, with a reduction from 2.51 to 1.83 at the end of lockdown phase. Although the sub-exponential growth confirmed mitigation of epidemic, $R_t$ larger than 1 still indicated ongoing disease transmission.                                                                                                            |
| Randhawa et al.(29); Research letter; 1/3/20-16/4/20.<br>Analysis of the positivity rates for SARS-CoV-2 in outpatient settings In Washington State and in emergency departments in Seattle | The US High                    | Statewide gathering limits            |                                      | Statewide shut down of bars and restaurants        |                              | Washington State's stay-home order       |                                                                       | <b>(Incidence):</b> The positivity rate was 17.6% in the outpatient clinics and 14.3% in emergency departments at the peak period and 3.8% and 9.8%, respectively, at the end of the analysis period.                                                                                                                                                                                                    |
| Rivkees et al. (23); Brief report; 1/3/2020-31/5/2020                                                                                                                                       | Florida, US High               | ✓                                     | Closures of elementary schools, high | Restricted access to bars and restaurants, limited | ✓                            | Statewide stay-at-home order             |                                                                       | <b>(Attendance)</b> Assessment of movement within the state using Google mobility and Unacast mobility analytics based on cell phone data showed that closing schools resulted in a 40-55% reduction in average                                                                                                                                                                                          |

| Article and Study Characteristics                                                                                |                                | Type of Social Distancing Measures                                    |                                                 |                                                                    |                                   |                                          |                                  | Effectiveness Indicators                                                                                                                                                                                                                                                                                                                                                                                                                        |
|------------------------------------------------------------------------------------------------------------------|--------------------------------|-----------------------------------------------------------------------|-------------------------------------------------|--------------------------------------------------------------------|-----------------------------------|------------------------------------------|----------------------------------|-------------------------------------------------------------------------------------------------------------------------------------------------------------------------------------------------------------------------------------------------------------------------------------------------------------------------------------------------------------------------------------------------------------------------------------------------|
| Authors; article type; study period/ publication date; study design                                              | Country/ region; economy level | Social distancing between individuals                                 | School measure / closure                        | Workplace measure / closure                                        | Public transport restriction      | Stay-at-home recommendation / ordinances | Others                           | <b>Infectivity:</b> $R_t$ , effective reduction number<br><b>Incidence:</b> Incidence, incidence rate, attack rate, bed occupancy rate<br><b>Mortality:</b> Mortality or fatality rate<br><b>Effect time:</b> Action and effect duration, time of reaching peak<br><b>Attendance:</b> Attendance % of location, daily vehicles miles, daily contact frequency, mobility of leaving home, travel distance                                        |
|                                                                                                                  |                                |                                                                       | schools, and universities for in-person classes | commerce to essential businesses                                   |                                   |                                          |                                  | distance traveled compared with pre-outbreak levels. The stay-at-home order was associated with a further reduction in average distance traveled. During the period under stay-at-home order, the density of in-person encounters fell by 74-82%, visits to nonessential venues by 55%, and overall distance traveled by 45%. Average distance traveled within the state decreased by 25-40%.                                                   |
| Rubin et al. (19)<br>Research article;<br>25/2/2020- 23/4/2020<br>Cohort study using publicly de-identified data | The US; High                   | ✓                                                                     |                                                 | Reduce visits to nonessential businesses                           |                                   |                                          |                                  | <b>(Infectivity):</b> In multivariable analysis, a 50% decline in visits to nonessential businesses was associated with a 45% decline in $R_t$ (95%CI, 43%-49%). With a 70% decrease in visits to nonessential business, a fall below a threshold $R_t$ of 1.0 was estimated in 202 counties (95.7%), including 17 of 21 counties (81.0%) in the top density decile and 52 of 53 counties (98.1%) in the lowest density quartile.               |
| Saez et al. (54)<br>Research report;<br>17/1/2020-5/4/2020<br>Time series analysis on the new daily cases        | Spain High                     | Reducing travel, avoiding crowded places, using non-contact greetings | ✓                                               | Closure of workplaces, stadiums, cinemas, theatres and restaurants |                                   | ✓                                        | Quarantines, travel restrictions | After implementing the measures for one day, the variation rate of accumulated cases decreased daily by 3.059 percentage points on average (95% credibility interval: -5.371, -0.879) and the decline was greater when time passed and reached 5.11 percentage points on the last day of data collection. Despite not entering the decrease phase, the measures taken by the Spanish Government on March 14, 2020 managed to flatten the curve. |
| Siedner et al. (25);<br>Research article;                                                                        | All 50 states of the US, High  | Statewide social distancing                                           | ✓                                               | ✓                                                                  | Restrictions on internal movement |                                          |                                  | <b>(Incidence)</b> The mean daily COVID-19 case growth rate dropped by 0.9% per day,                                                                                                                                                                                                                                                                                                                                                            |

| Article and Study Characteristics                                                                                                 |                                                                                                         | Type of Social Distancing Measures          |                          |                                                      |                                     |                                                   |                                                        | Effectiveness Indicators                                                                                                                                                                                                                                                                                                                                                                                         |
|-----------------------------------------------------------------------------------------------------------------------------------|---------------------------------------------------------------------------------------------------------|---------------------------------------------|--------------------------|------------------------------------------------------|-------------------------------------|---------------------------------------------------|--------------------------------------------------------|------------------------------------------------------------------------------------------------------------------------------------------------------------------------------------------------------------------------------------------------------------------------------------------------------------------------------------------------------------------------------------------------------------------|
| Authors; article type; study period/ publication date; study design                                                               | Country/ region; economy level                                                                          | Social distancing between individuals       | School measure / closure | Workplace measure / closure                          | Public transport restriction        | Stay-at-home recommendation / ordinances          | Others                                                 | <b>Infectivity:</b> $R_t$ , effective reduction number<br><b>Incidence:</b> Incidence, incidence rate, attack rate, bed occupancy rate<br><b>Mortality:</b> Mortality or fatality rate<br><b>Effect time:</b> Action and effect duration, time of reaching peak<br><b>Attendance:</b> Attendance % of location, daily vehicles miles, daily contact frequency, mobility of leaving home, travel distance         |
| 10/3/2020-26/5/2020<br>Longitudinal pretest–posttest comparison study of incidence and mortality                                  |                                                                                                         | measures with cancellation of public events |                          |                                                      | and closure of state borders        |                                                   |                                                        | starting 4 days after implementation of the first statewide social distancing measures. <b>(Mortality)</b> After implementing social distancing for 7 days, the COVID-19-attributed mortality growth rate fell by 2.0% per day, although this decline was no longer statistically significant by 10 days.                                                                                                        |
| Thu et al.(38);<br>Research article;<br>11/1 – 2/5/2020<br>Time-series analysis based on daily cases                              | 10 countries: the US, Spain, Italy, UK, France, Germany, Russia, Turkey, Iran and China; Middle to High | Cancellation of public events               | ✓                        | Work from home, cancellation of non-essential events | Domestic transportation restriction | By region and, by nationwide, by different phases | Entry restrictions to those from highly infected areas | <b>(Incidence):</b> Growth rates of daily confirmed cases in the UK and the US were the most severe, at 99.9%, followed by Spain at 99.2%, France at 96.2%, Italy at 95.4%, Germany at 85%, Russia at 72.2%, Turkey at 70.7% and Iran at 62.8%. Countries with high growth rate showed lower decline rate, showing longer time needed for those countries to control the epidemic by social distancing measures. |
| Vokó et al.(55);<br>Research article;<br>1/2/2020-18/4/2020<br>Modelling study using daily new cases                              | 28 European countries; High                                                                             | Social distancing with public event ban     | ✓                        | ✓                                                    | ✓                                   | ✓                                                 |                                                        | (Incidence) Incidence of new COVID-19 cases grew by 24% per day on average before the changepoint. From the changepoint observed, the growth rate was reduced to 0.9%, 0.3% increase, and to 0.7% and 1.7% decrease by increasing social distancing quartiles based on Social Distance Index (SDI) calculated based on Google Community Mobility Reports.                                                        |
| Wan et al.(30);<br>Research article;<br>20/1/2020-3/3/2020<br>Modelling study using incidence data, with death and recovery cases | Mainland of China excluding Hubei; Middle                                                               | Social distancing and self-isolation        |                          |                                                      | ✓                                   |                                                   | Close contact tracing, body temperature measurement    | <b>(Infectivity)</b> $R_t$ has dropped sharply from 3.34 on 20 January 2020 to 0.89 on 31 January 2020, after integrated control strategies were implemented.                                                                                                                                                                                                                                                    |



| Article and Study Characteristics                                                                                                                                      |                                                                                                              | Type of Social Distancing Measures    |                          |                             |                              |                                          |                          | Effectiveness Indicators                                                                                                                                                                                                                                                                                                                                                                                                                                                                                                                                    |
|------------------------------------------------------------------------------------------------------------------------------------------------------------------------|--------------------------------------------------------------------------------------------------------------|---------------------------------------|--------------------------|-----------------------------|------------------------------|------------------------------------------|--------------------------|-------------------------------------------------------------------------------------------------------------------------------------------------------------------------------------------------------------------------------------------------------------------------------------------------------------------------------------------------------------------------------------------------------------------------------------------------------------------------------------------------------------------------------------------------------------|
| Authors; article type; study period/ publication date; study design                                                                                                    | Country/ region; economy level                                                                               | Social distancing between individuals | School measure / closure | Workplace measure / closure | Public transport restriction | Stay-at-home recommendation / ordinances | Others                   | <b>Infectivity:</b> $R_t$ , effective reduction number<br><b>Incidence:</b> Incidence, incidence rate, attack rate, bed occupancy rate<br><b>Mortality:</b> Mortality or fatality rate<br><b>Effect time:</b> Action and effect duration, time of reaching peak<br><b>Attendance:</b> Attendance % of location, daily vehicles miles, daily contact frequency, mobility of leaving home, travel distance                                                                                                                                                    |
| Weill et al. (18); Research article; 1/1/2020-21/4/2020<br>Event study design on behavior subsequent to state emergency orders                                         | The US; High                                                                                                 | ✓                                     |                          | business closures           |                              |                                          | Safer-at-home orders     | <b>(Attendance):</b> Median distance traveled, retail and recreation, locations visited by a mobile device per day showed a sharp decrease in March after the implementation of social distancing measures, with the wealthier areas decreasing mobility more significantly than poorer areas. However, the trend shifted reversely after March regarding completely staying at home. People from wealthier areas shifted from the lowest before March to the most likely to completely stay at home after March, vice versa for those in poorer countries. |
| Wilasang et al.(56); Research article; From the date of 100 cases to 7/4/2020<br>Analysis on the number of daily new cases and the distribution of the serial interval | 10 countries: Belgium, China, France, Germany, Iran, South Korea, Spain, Thailand, US and UK; Middle to High | ✓                                     |                          |                             |                              | ✓                                        | Active case finding      | <b>(Infectivity):</b> After 3-week control measures, only China and South Korea were successful in controlling the disease ( $R_t < 1$ ), while the others were unsuccessful. The study observed that countries with active case-finding and prompt isolation could have a reduction in the reproduction number more rapidly.                                                                                                                                                                                                                               |
| Yehya et al.(57); Research article; 21/1-29/4/2020<br>Ecological study using secondary data to analyze relationship between timing of                                  | The US; High                                                                                                 |                                       | School closure           |                             |                              |                                          | Declaration of Emergency | <b>(Mortality):</b> Each day of delay of either intervention increased mortality risk by 5-6%.                                                                                                                                                                                                                                                                                                                                                                                                                                                              |



| Article and Study Characteristics                                                                                                                                          |                                                 | Type of Social Distancing Measures    |                          |                             |                              |                                          |           | Effectiveness Indicators                                                                                                                                                                                                                                                                                                                                                                                                                                                                                                                                                                                                                            |
|----------------------------------------------------------------------------------------------------------------------------------------------------------------------------|-------------------------------------------------|---------------------------------------|--------------------------|-----------------------------|------------------------------|------------------------------------------|-----------|-----------------------------------------------------------------------------------------------------------------------------------------------------------------------------------------------------------------------------------------------------------------------------------------------------------------------------------------------------------------------------------------------------------------------------------------------------------------------------------------------------------------------------------------------------------------------------------------------------------------------------------------------------|
| Authors; article type; study period/ publication date; study design                                                                                                        | Country/ region; economy level                  | Social distancing between individuals | School measure / closure | Workplace measure / closure | Public transport restriction | Stay-at-home recommendation / ordinances | Others    | <b>Infectivity:</b> $R_t$ , effective reduction number<br><b>Incidence:</b> Incidence, incidence rate, attack rate, bed occupancy rate<br><b>Mortality:</b> Mortality or fatality rate<br><b>Effect time:</b> Action and effect duration, time of reaching peak<br><b>Attendance:</b> Attendance % of location, daily vehicles miles, daily contact frequency, mobility of leaving home, travel distance                                                                                                                                                                                                                                            |
| interventions and mortality                                                                                                                                                |                                                 |                                       |                          |                             |                              |                                          |           |                                                                                                                                                                                                                                                                                                                                                                                                                                                                                                                                                                                                                                                     |
| Zhang et al.(32); Research article; 24 – 30/12/2019 as baseline and 1-10/2/2020 as outbreak period<br>Analysis on contact survey data reported by 1,193 study participants | Wuhan and Shanghai; Middle                      |                                       | ✓                        |                             | ✓                            |                                          |           | <b>(Attendance):</b> Daily contact frequency in Wuhan showed a reduction from 14.6 to 2.0 while Shanghai from 18.8 to 2.3. The trend was consistent with mobility data of an 86.9% and a 74.5% drop in Wuhan and Shanghai respectively.                                                                                                                                                                                                                                                                                                                                                                                                             |
| Zhang et al. (58); Research article; 23/1– 9/5/2020<br>Analysis of the changes in incidence                                                                                | Wuhan (China), Italy and the US; Middle to High | ✓                                     |                          |                             |                              | Stay-at-home                             | Face mask | <b>(Incidence):</b> Daily new infection in New York decreased with a slope of 106 cases per day (decreasing rate at around 3%) after face mask-on policy, while US (excluding New York) increased with a slope of 70 cases per day (increasing rate at around 0.3%). The decreasing rate in the daily new infections in New York with face covering mandate was proportionately higher than that in the United States with only social distancing and stay-at-home order, illustrating the importance of face covering on stemming the virus spread. With mask-on policy, Italy showed an infection reduction by over 75,000 from April 6 to May 9. |
| 58 <sup>th</sup> SAGE meeting summary (22); Review;                                                                                                                        | The UK; High                                    |                                       |                          |                             |                              | Lockdown, short stay-at-home order       |           | <b>(Infectivity):</b> Lockdown was very impactful and reduced $R_t$ from 2.7 to 0.6. 2-3 week short stay-at-home order had moderate impact on reducing $R_t$ to less than 1. Both showed high confidence correlation.                                                                                                                                                                                                                                                                                                                                                                                                                               |

| Article and Study Characteristics                                   |                                | Type of Social Distancing Measures                                                                              |                                                                                                                                               |                             |                                                                                    |                                          | Effectiveness Indicators |                                                                                                                                                                                                                                                                                                                                                                                                                                                                                                                                                                                 |
|---------------------------------------------------------------------|--------------------------------|-----------------------------------------------------------------------------------------------------------------|-----------------------------------------------------------------------------------------------------------------------------------------------|-----------------------------|------------------------------------------------------------------------------------|------------------------------------------|--------------------------|---------------------------------------------------------------------------------------------------------------------------------------------------------------------------------------------------------------------------------------------------------------------------------------------------------------------------------------------------------------------------------------------------------------------------------------------------------------------------------------------------------------------------------------------------------------------------------|
| Authors; article type; study period/ publication date; study design | Country/ region; economy level | Social distancing between individuals                                                                           | School measure / closure                                                                                                                      | Workplace measure / closure | Public transport restriction                                                       | Stay-at-home recommendation / ordinances | Others                   | <b>Infectivity:</b> $R_t$ , effective reduction number<br><b>Incidence:</b> Incidence, incidence rate, attack rate, bed occupancy rate<br><b>Mortality:</b> Mortality or fatality rate<br><b>Effect time:</b> Action and effect duration, time of reaching peak<br><b>Attendance:</b> Attendance % of location, daily vehicles miles, daily contact frequency, mobility of leaving home, travel distance                                                                                                                                                                        |
|                                                                     |                                | Decreasing contact between households, closure of worship/ community centers, restriction on outdoor gatherings |                                                                                                                                               |                             |                                                                                    |                                          |                          | <b>(Infectivity):</b> Moderate impact was found by stopping contacts among different households, reducing $R_t$ by around 0.1-0.2. Low to moderate impact was shown following closure of worship/ community centers, with a potential reduction in $R_t$ up to 0.1. Low impact came with the restriction on outdoor gatherings, with $R_t$ being reduced to less than 0.05, considering the frailty of SARS-CoV2 under well-ventilated environment.                                                                                                                             |
|                                                                     |                                |                                                                                                                 |                                                                                                                                               |                             | Local 5-mile travel restriction, use of public transport restricted to key workers |                                          |                          | <b>(Infectivity):</b> The impact of 5-mile travel restriction was considered as low to moderate, with limited benefit especially when local outbreak was widespread. Restricted use of public transport to key workers might have low impact due to low level of crowding, mandated face-mask policy and inconclusive evidence of the transmission risk in public transport.                                                                                                                                                                                                    |
|                                                                     |                                |                                                                                                                 | Mass / reactive school closure, closure of class with infection, alternative school schedules with half class sizes, closure of further/ high |                             |                                                                                    |                                          |                          | <b>(Infectivity):</b> Moderate impact of closing all schools was found, with a reduction in $R_t$ of 0.2~0.5 while closing secondary schools was considered to be more effective, with a $R_t$ drop of 0.35. Reactive school closure might have a moderate impact on the reduction in $R_t$ of 0.12 ~ 0.45 whereas low to moderate impact was estimated for reactive closure of class with infection. Alternative school schedules with reduced class size were suggested to have moderate to low impact. Closure of further / higher education associated with moderate impact |

| Article and Study Characteristics                                   |                                   | Type of Social Distancing Measures    |                          |                                                                                                                                                                                                              |                                                            |                                          |        | Effectiveness Indicators                                                                                                                                                                                                                                                                                                                                                                                                                                                                                                                                                                                                                                                                                           |
|---------------------------------------------------------------------|-----------------------------------|---------------------------------------|--------------------------|--------------------------------------------------------------------------------------------------------------------------------------------------------------------------------------------------------------|------------------------------------------------------------|------------------------------------------|--------|--------------------------------------------------------------------------------------------------------------------------------------------------------------------------------------------------------------------------------------------------------------------------------------------------------------------------------------------------------------------------------------------------------------------------------------------------------------------------------------------------------------------------------------------------------------------------------------------------------------------------------------------------------------------------------------------------------------------|
| Authors; article type; study period/ publication date; study design | Country/ region; economy level    | Social distancing between individuals | School measure / closure | Workplace measure / closure                                                                                                                                                                                  | Public transport restriction                               | Stay-at-home recommendation / ordinances | Others | <b>Infectivity:</b> $R_t$ , effective reduction number<br><b>Incidence:</b> Incidence, incidence rate, attack rate, bed occupancy rate<br><b>Mortality:</b> Mortality or fatality rate<br><b>Effect time:</b> Action and effect duration, time of reaching peak<br><b>Attendance:</b> Attendance % of location, daily vehicles miles, daily contact frequency, mobility of leaving home, travel distance                                                                                                                                                                                                                                                                                                           |
|                                                                     |                                   |                                       | education or childcare   |                                                                                                                                                                                                              |                                                            |                                          |        | while closure of childcare might have low to moderate impact.                                                                                                                                                                                                                                                                                                                                                                                                                                                                                                                                                                                                                                                      |
|                                                                     |                                   |                                       |                          | Work from home, alternate work, closure of bars/ pubs/ cafes/ restaurants, closure of gym/ leisure centers, non-essential retail, personal services, adherence to "COVID security" arrangement in workplaces |                                                            |                                          |        | <b>(Infectivity):</b> Moderate impact of work from home was evaluated with a $R_t$ reduction of 0.2-0.4 if all people followed while low to moderate impact with a $R_t$ drop up to 0.1 was estimated for alternate work. Moderate impact with potential reduction in $R_t$ of 0.1-0.2 was predicted for the closure of bars/pub/restaurants. Closure of gym/ leisure centres associated with low to moderate impact, with potential reduction in $R_t$ of up to 0.1. Impact of closure of non-essential retail and personal services was estimated to be limited. Adherence to "COVID security" in workplaces such as improved hand/ surface hygiene and added barrier setting was also considered as low impact. |
| ECDC (11); Review; Published on 24 Sept 2020                        | Members of the EU countries; High |                                       |                          |                                                                                                                                                                                                              |                                                            | Stay-at-home                             |        | <b>(Infectivity):</b> $R_t$ reduced by 18% (ranging from 4-31%).                                                                                                                                                                                                                                                                                                                                                                                                                                                                                                                                                                                                                                                   |
|                                                                     |                                   | Physical distance between 1-2m        |                          |                                                                                                                                                                                                              |                                                            |                                          |        | <b>(Infectivity):</b> Physical distancing of 1 metre or more was linked to an approximately five-fold reduction of the transmission risk, with the protective effect being doubled for every extra metre added.                                                                                                                                                                                                                                                                                                                                                                                                                                                                                                    |
|                                                                     |                                   |                                       |                          |                                                                                                                                                                                                              | Domestic travel restrictions: a cordon sanitaire or public |                                          |        | <b>(Infectivity):</b> There were contradictory results on $R_t$ among the studies. Modelling showed strong association while other studies showed no impact unless other NPI was put in place, e.g., physical distancing. It                                                                                                                                                                                                                                                                                                                                                                                                                                                                                       |

| Article and Study Characteristics                                   |                                | Type of Social Distancing Measures    |                          |                                                                                                           |                              |                                          |        | Effectiveness Indicators                                                                                                                                                                                                                                                                                                                                                                                 |
|---------------------------------------------------------------------|--------------------------------|---------------------------------------|--------------------------|-----------------------------------------------------------------------------------------------------------|------------------------------|------------------------------------------|--------|----------------------------------------------------------------------------------------------------------------------------------------------------------------------------------------------------------------------------------------------------------------------------------------------------------------------------------------------------------------------------------------------------------|
| Authors; article type; study period/ publication date; study design | Country/ region; economy level | Social distancing between individuals | School measure / closure | Workplace measure / closure                                                                               | Public transport restriction | Stay-at-home recommendation / ordinances | Others | <b>Infectivity:</b> $R_t$ , effective reduction number<br><b>Incidence:</b> Incidence, incidence rate, attack rate, bed occupancy rate<br><b>Mortality:</b> Mortality or fatality rate<br><b>Effect time:</b> Action and effect duration, time of reaching peak<br><b>Attendance:</b> Attendance % of location, daily vehicles miles, daily contact frequency, mobility of leaving home, travel distance |
|                                                                     |                                |                                       |                          |                                                                                                           | transportation closure       |                                          |        | was difficult to relate observed changes in transmission dynamics to a single measure.                                                                                                                                                                                                                                                                                                                   |
|                                                                     |                                |                                       | School closure           |                                                                                                           |                              |                                          |        | <b>(Incidence):</b> Observational data suggested that reopening schools has not been associated with significant increases in community transmission.                                                                                                                                                                                                                                                    |
|                                                                     |                                |                                       |                          | Work from home, flexible working time and social distancing measures, closure of non-essential businesses |                              |                                          |        | <b>(Infectivity):</b> There was a 40% $R_t$ reduction by closing most of non-essential businesses while 31% by closing high risk businesses, e.g., restaurant/ bars/ nightclub/ cinemas/ gym.                                                                                                                                                                                                            |

**Table 3 Comparison of the major outcomes of different types/levels of social distancing**

|                                                                                                             | <b>Social distancing between individuals</b>                                                                                                                                                                                                                                                        | <b>School closure</b>                                                                                                                                                                                                                              | <b>Workplace measures</b>                                                                                                                                                                                                                                                               | <b>Public transport restriction</b>                      | <b>Partial lockdown</b>                                                                                                                                                        | <b>Full lockdown</b>                                                                                                                                                                                                                                                                                                                                                                                  |
|-------------------------------------------------------------------------------------------------------------|-----------------------------------------------------------------------------------------------------------------------------------------------------------------------------------------------------------------------------------------------------------------------------------------------------|----------------------------------------------------------------------------------------------------------------------------------------------------------------------------------------------------------------------------------------------------|-----------------------------------------------------------------------------------------------------------------------------------------------------------------------------------------------------------------------------------------------------------------------------------------|----------------------------------------------------------|--------------------------------------------------------------------------------------------------------------------------------------------------------------------------------|-------------------------------------------------------------------------------------------------------------------------------------------------------------------------------------------------------------------------------------------------------------------------------------------------------------------------------------------------------------------------------------------------------|
| <b>Relative frequency and consistency of evidence#</b>                                                      | Adequate                                                                                                                                                                                                                                                                                            | Moderate                                                                                                                                                                                                                                           | Limited                                                                                                                                                                                                                                                                                 | No                                                       | Adequate                                                                                                                                                                       | Adequate                                                                                                                                                                                                                                                                                                                                                                                              |
| <b>(Infectivity):<br/>R<sub>t</sub>, effective reduction number</b>                                         | <p>Physical distancing of 1 meter or more could reduce the transmission risk by 5 times and the protective impact was double for every extra meter (16).</p> <p>Estimated R<sub>t</sub> reduced by 36%, 28% and 12% when gatherings were limited to 10, 100 and 1,000 people respectively (17).</p> |                                                                                                                                                                                                                                                    | <p>Estimated 29% R<sub>t</sub> reduction by closing most of non-essential businesses while 20% by closing high risk businesses (17).</p> <p>In the US, a 50% decline in visits to nonessential businesses was associated with a 45% decline in R<sub>t</sub> [95%CI, 43%-49%] (19).</p> | <p>No difference in reduction in R<sub>t</sub> (10).</p> | <p>In Mainland China excluding Hubei (province of Wuhan), R<sub>t</sub> dropped from 3.34 to 0.89 (30).</p> <p>In 58 cities of China, R<sub>t</sub> dropped by 54.3% (31).</p> | <p>From data of 41 countries, estimated R<sub>t</sub> reduced by 10% by stay-at-home orders (-2%–22%) (17).</p> <p>UK estimation suggested that country lockdown could reduce R<sub>t</sub> from 2.7 to 0.6 while 2-3 week short stay-at-home order had moderate impact by reducing R<sub>t</sub> to below 1 (22).</p> <p>China R<sub>t</sub> reduced from 2.35 to 1.05 during the lockdown (49).</p> |
| <b>(Incidence):<br/>Infection incidence/ ratio of incidence rate ratio/ attack rate/ bed occupancy rate</b> | <p>In the US, COVID-19 infection was less likely among the public who always practiced social distancing (aOR for indoor social distancing, 0.32 [95% CI, .10–.99]; aOR for outdoor social distancing, 0.10 [95% CI, .03–.33] (20).</p>                                                             | <p>In the US, school closure decreased COVID-19 incidence (adjusted relative change per week, -62%) (24).</p> <p>Observational data from a number of the EU countries suggested that re-opening of schools was not associated with increase of</p> |                                                                                                                                                                                                                                                                                         |                                                          | <p>In the US, mean daily COVID-19 case growth rate decreased by 0.9% per day four days after lockdown (25).</p>                                                                | <p>Data from 32 countries showed decreased incidence of COVID-19 (pooled incident rate ratio, IRR 0.87, 0.84 to 0.91) (10).</p> <p>Growth rate of daily confirmed cases reduced by 5.4% after 1-5 days, 6.8% after 6-10 days, 8.2% after 11-15 days, 9.1% after 16-20 days (37).</p>                                                                                                                  |

|    |                            |                                                                                                                    |  |  |                                                                                                              |                                                                                                                                                                                             |
|----|----------------------------|--------------------------------------------------------------------------------------------------------------------|--|--|--------------------------------------------------------------------------------------------------------------|---------------------------------------------------------------------------------------------------------------------------------------------------------------------------------------------|
|    |                            | community transmission (11).                                                                                       |  |  |                                                                                                              |                                                                                                                                                                                             |
| 1  |                            |                                                                                                                    |  |  |                                                                                                              |                                                                                                                                                                                             |
| 2  | <b>(Mortality):</b>        |                                                                                                                    |  |  |                                                                                                              |                                                                                                                                                                                             |
| 3  | <b>Mortality/ fatality</b> |                                                                                                                    |  |  |                                                                                                              |                                                                                                                                                                                             |
| 4  | <b>rate</b>                | In the US, school closure decreased COVID-19 related mortality (~58%) (24).                                        |  |  | In the US, COVID-19-attributed mortality growth rate decreased by 2% per day seven days after lockdown (25). |                                                                                                                                                                                             |
| 5  |                            |                                                                                                                    |  |  |                                                                                                              |                                                                                                                                                                                             |
| 6  |                            |                                                                                                                    |  |  |                                                                                                              |                                                                                                                                                                                             |
| 7  | <b>(Effect time):</b>      |                                                                                                                    |  |  |                                                                                                              |                                                                                                                                                                                             |
| 8  | <b>Action and effect</b>   |                                                                                                                    |  |  |                                                                                                              |                                                                                                                                                                                             |
| 9  | <b>duration / time of</b>  |                                                                                                                    |  |  |                                                                                                              |                                                                                                                                                                                             |
| 10 | <b>reaching peak</b>       |                                                                                                                    |  |  | In 58 cities of China, mean time until successful containment was 8 days (31).                               |                                                                                                                                                                                             |
| 11 |                            |                                                                                                                    |  |  |                                                                                                              |                                                                                                                                                                                             |
| 12 | <b>(Attendance):</b>       |                                                                                                                    |  |  |                                                                                                              |                                                                                                                                                                                             |
| 13 | <b>Attendance % of</b>     |                                                                                                                    |  |  |                                                                                                              |                                                                                                                                                                                             |
| 14 | <b>location/ daily</b>     |                                                                                                                    |  |  |                                                                                                              |                                                                                                                                                                                             |
| 15 | <b>vehicles miles/</b>     |                                                                                                                    |  |  |                                                                                                              |                                                                                                                                                                                             |
| 16 | <b>daily contact</b>       |                                                                                                                    |  |  |                                                                                                              |                                                                                                                                                                                             |
| 17 | <b>frequency/</b>          |                                                                                                                    |  |  |                                                                                                              |                                                                                                                                                                                             |
| 18 | <b>mobility of leaving</b> |                                                                                                                    |  |  |                                                                                                              |                                                                                                                                                                                             |
| 19 | <b>home/ distance</b>      |                                                                                                                    |  |  |                                                                                                              |                                                                                                                                                                                             |
| 20 | <b>travel</b>              | In Florida, the US found that closing of schools resulted in a 40-55% reduction in average distance traveled (23). |  |  | In Spain, self-reported walking time decreased by 58.2% (46).                                                | In Wuhan and Shanghai, the average daily number of contacts dropped from 14.6 to 2 and 18.8 to 2.3 respectively during lockdown. Mobility dropped 86.9% and 74.5% in respective areas (32). |
| 21 |                            |                                                                                                                    |  |  |                                                                                                              |                                                                                                                                                                                             |
| 22 |                            |                                                                                                                    |  |  |                                                                                                              |                                                                                                                                                                                             |
| 23 |                            |                                                                                                                    |  |  |                                                                                                              |                                                                                                                                                                                             |
| 24 |                            |                                                                                                                    |  |  |                                                                                                              |                                                                                                                                                                                             |
| 25 |                            |                                                                                                                    |  |  |                                                                                                              |                                                                                                                                                                                             |
| 26 |                            |                                                                                                                    |  |  |                                                                                                              |                                                                                                                                                                                             |
| 27 |                            |                                                                                                                    |  |  |                                                                                                              |                                                                                                                                                                                             |
| 28 |                            |                                                                                                                    |  |  |                                                                                                              |                                                                                                                                                                                             |
| 29 |                            |                                                                                                                    |  |  |                                                                                                              |                                                                                                                                                                                             |
| 30 |                            |                                                                                                                    |  |  |                                                                                                              | Stay-at-home order in Florida of the US resulted in a reduction of in-person encounters by 74-82%, visits to nonessential venues by 55%, and overall distance traveled by 45% (23).         |

# Relative frequency and consistency of evidence based on the studies reviewed, without risk of bias assessment

## References

1. WHO. Non-pharmaceutical public health measures for mitigating the risk and impact of epidemic and pandemic influenza. Geneva; 2019.
2. WHO. COVID-19: physical distancing 2020 [Available from: <https://www.who.int/westernpacific/emergencies/covid-19/information/physical-distancing>].
3. Chowdhury R, Luhar S, Khan N, Choudhury SR, Matin I, Franco OH. Long-term strategies to control COVID-19 in low and middle-income countries: an options overview of community-based, non-pharmacological interventions. *European Journal of Epidemiology*. 2020; 35(8): 743–748.
4. Lino DODC, Barreto R, Souza FDD, Lima CJMD, Silva Junior GBD. Impact of lockdown on bed occupancy rate in a referral hospital during the COVID-19 pandemic in northeast Brazil. *Brazilian Journal of Infectious Diseases*. 2020;24(5):466-9.
5. Pepin JL, Bruno RM, Yang RY, Vercamer V, Jouhaud P, Escourrou P, et al. Wearable Activity Trackers for Monitoring Adherence to Home Confinement During the COVID-19 Pandemic Worldwide: Data Aggregation and Analysis. *Journal of medical Internet research*. 2020;22(6):e19787.
6. Viner RM, Russell SJ, Croker H, Packer J, Ward J, Stansfield C, et al. School closure and management practices during coronavirus outbreaks including COVID-19: a rapid systematic review. *The Lancet Child and Adolescent Health*. 2020;4(5):397-404.
7. Chowdhury R, Heng K, Shawon MSR, Goh G, Okonofua D, Ochoa-Rosales C, et al. Dynamic interventions to control COVID-19 pandemic: a multivariate prediction modelling study comparing 16 worldwide countries. *European Journal of Epidemiology*. 2020;35(5):389-99.
8. Lai S, Ruktanonchai NW, Zhou L, Prosper O, Luo W, Floyd JR, et al. Effect of non-pharmaceutical interventions to contain COVID-19 in China. *Nature*. 2020 Sep;585(7825):410-413.
9. Nussbaumer-Streit B, Mayr V, Dobrescu AI, Chapman A, Persad E, Klerings I, et al. Quarantine alone or in combination with other public health measures to control COVID-19: a rapid review. *The Cochrane database of systematic reviews*. 2020;4:CD013574.
10. Islam N, Sharp SJ, Chowell G, Shabnam S, Kawachi I, Lacey B, et al. Physical distancing interventions and incidence of coronavirus disease 2019: natural experiment in 149 countries. *BMJ*. 2020;370:m2743.
11. ECDC. Guidelines for non-pharmaceutical interventions to reduce the impact of COVID-19 in the EU/EEA and the UK. Stockholm; 2020.
12. Meyer J, Pare G. Telepathology Impacts and Implementation Challenges: A Scoping Review. *Arch Pathol Lab Med*. 2015;139(12):1550-7.
13. Tricco AC, Zarin W, Rios P, Nincic V, Khan PA, Ghassemi M, et al. Engaging policy-makers, health system managers, and policy analysts in the knowledge synthesis process: a scoping review. *Implement Sci*. 2018;13(1):31.
14. Lockwood C, Tricco AC. Preparing scoping reviews for publication using methodological guides and reporting standards. *Nurs Health Sci*. 2020;22(1):1-4.
15. Tricco AC, Lillie E, Zarin W, O'Brien KK, Colquhoun H, Levac D, et al. PRISMA Extension for Scoping Reviews (PRISMA-ScR): Checklist and Explanation. *Ann Intern Med*. 2018;169(7):467-73.
16. Chu DK, Akl EA, Duda S, Solo K, Yaacoub S, Schünemann HJ. Physical distancing, face masks, and eye protection to prevent person-to-person transmission of SARS-CoV-2 and COVID-19: a systematic review and meta-analysis. *Lancet*. 2020;395(10242):1973-87.
17. Brauner JM, Mindermann S, Sharma M, Johnston D, Salvatier J, Gavenčiak T, et al. The effectiveness of eight nonpharmaceutical interventions against COVID-19 in 41 countries. *medRxiv*. 2020:2020.05.28.20116129.



18. Weill JA, Stigler M, Deschenes O, Springborn MR. Social distancing responses to COVID-19 emergency declarations strongly differentiated by income. *Proceedings of the National Academy of Sciences of the United States of America*. 2020;117(33):19658-60.
19. Rubin D, Huang J, Fisher BT, Gasparrini A, Tam V, Song L, et al. Association of Social Distancing, Population Density, and Temperature with the Instantaneous Reproduction Number of SARS-CoV-2 in Counties across the United States. *JAMA Network Open*. 2020;3(7) (no pagination).
20. Clipman SJ, Wesolowski AP, Gibson DG, Agarwal S, Lambrou AS, Kirk GD, et al. Rapid real-time tracking of non-pharmaceutical interventions and their association with SARS-CoV-2 positivity: The COVID-19 Pandemic Pulse Study. *Clinical infectious diseases : an official publication of the Infectious Diseases Society of America*. 2020;02.
21. Lemaitre JC, Perez-Saez J, Azman AS, Rinaldo A, Fellay J. Assessing the impact of non-pharmaceutical interventions on SARS-CoV-2 transmission in Switzerland. *Swiss Medical Weekly*. 2020;150(21-22) (no pagination).
22. SAGE. The effectiveness and harms of non-pharmaceutical interventions. 2020 21 September 2020.
23. Rivkees SA, Roberson S. The Florida Department of Health STEPS Public Health Approach: The COVID-19 Response Plan and Outcomes Through May 31, 2020. *Public Health Reports*. 2020;135(5):560-4.
24. Auger KA, Shah SS, Richardson T, Hartley D, Hall M, Warniment A, et al. Association Between Statewide School Closure and COVID-19 Incidence and Mortality in the US. *JAMA*. 2020;324(9):859-70.
25. Siedner MJ, Harling G, Reynolds Z, Gilbert RF, Haneuse S, Venkataramani AS, et al. Social distancing to slow the US COVID-19 epidemic: Longitudinal pretest-posttest comparison group study. *PLoS Medicine*. 2020;17(8 August).
26. Otte Im Kampe E, Lehfeld AS, Buda S, Buchholz U, Haas W. Surveillance of COVID-19 school outbreaks, Germany, March to August 2020. *Euro Surveill*. 2020;25(38).
27. Ehrhardt J, Ekinci A, Krehl H, Meincke M, Finci I, Klein J, et al. Transmission of SARS-CoV-2 in children aged 0 to 19 years in childcare facilities and schools after their reopening in May 2020, Baden-Wurtemberg, Germany. *Euro Surveill*. 2020;25(36).
28. Macartney K, Quinn HE, Pillsbury AJ, Koirala A, Deng L, Winkler N, et al. Transmission of SARS-CoV-2 in Australian educational settings: a prospective cohort study. *Lancet Child Adolesc Health*. 2020;4(11):807-16.
29. Randhawa AK, Fisher LH, Greninger AL, Li SS, Andriesen J, Corey L, et al. Changes in SARS-CoV-2 Positivity Rate in Outpatients in Seattle and Washington State, March 1-April 16, 2020. *JAMA*. 2020;323(22):2334-6.
30. Wan H, Cui JA, Yang GJ. Risk estimation and prediction of the transmission of coronavirus disease-2019 (COVID-19) in the mainland of China excluding Hubei province. *Infectious Diseases of Poverty*. 2020;9(1).
31. Du Z, Xu X, Wang L, Fox SJ, Cowling BJ, Galvani AP, et al. Effects of Proactive Social Distancing on COVID-19 Outbreaks in 58 Cities, China. *Emerging infectious diseases*. 2020;26(9).
32. Zhang J, Litvinova M, Liang Y, Wang Y, Wang W, Zhao S, et al. Changes in contact patterns shape the dynamics of the COVID-19 outbreak in China. *Science (New York, NY)*. 2020;368(6498):1481-6.
33. Pan A, Liu L, Wang C, Guo H, Hao X, Wang Q, et al. Association of Public Health Interventions with the Epidemiology of the COVID-19 Outbreak in Wuhan, China. *JAMA - Journal of the American Medical Association*. 2020;323(19):1915-23.

- 1  
2  
3  
4  
5  
6  
7  
8  
9  
10  
11  
12  
13  
14  
15  
16  
17  
18  
19  
20  
21  
22  
23  
24  
25  
26  
27  
28  
29  
30  
31  
32  
33  
34  
35  
36  
37  
38  
39  
40  
41  
42  
43  
44  
45  
46  
47  
48  
49  
50  
51  
52  
53  
54  
55  
56  
57  
58  
59  
60
34. Lim JT, Dickens BSL, Choo ELW, Chew LZ, Koo JRH, Tam C, et al. Revealing regional disparities in the transmission potential of SARS-CoV-2 from interventions in Southeast Asia. *Proc Biol Sci.* 2020;287(1933):20201173.
  35. Marschner IC. Back-projection of COVID-19 diagnosis counts to assess infection incidence and control measures: Analysis of Australian data. *Epidemiology and Infection.* 2020 May 18;148:e97.
  36. Koh WC, Naing L, Wong J. Estimating the impact of physical distancing measures in containing COVID-19: an empirical analysis. *International Journal of Infectious Diseases.* 2020;100:42-9.
  37. Courtemanche C, Garuccio J, Le A, Pinkston J, Yelowitz A. Strong Social Distancing Measures In The United States Reduced The COVID-19 Growth Rate. *Health affairs (Project Hope).* 2020;39(7):1237-46.
  38. Thu TPB, Ngoc PNH, Hai NM, Tuan LA. Effect of the social distancing measures on the spread of COVID-19 in 10 highly infected countries. *Science of the Total Environment.* 2020;742 (no pagination)(140430).
  39. Lam HY, Lam TS, Wong CH, Lam WH, Leung CME, Au KWA, et al. The epidemiology of COVID-19 cases and the successful containment strategy in Hong Kong-January to May 2020. *International Journal of Infectious Diseases.* 2020;98:51-8.
  40. Cruz CHB. Social distancing in Sao Paulo State: demonstrating the reduction in cases using time series analysis of deaths due to COVID-19. *Rev Bras Epidemiol.* 2020;23:e200056.
  41. Huynh TLD. Does culture matter social distancing under the COVID-19 pandemic? *Saf Sci.* 2020;130:104872.
  42. Correia S, Luck S, Verner E. Pandemics Depress the Economy, Public Health Interventions Do Not: Evidence from the 1918 Flu. *SSRN Electronic Journal.* 2020.
  43. Abel T, McQueen D. The COVID-19 pandemic calls for spatial distancing and social closeness: not for social distancing! *Int J Public Health.* 2020;65(3):231.
  44. Kim SW, Su KP. Using psychoneuroimmunity against COVID-19. *Brain Behav Immun.* 2020;87:4-5.
  45. Our World in Data. Coronavirus (COVID-19) Vaccinations [Available from: <https://ourworldindata.org/covid-vaccinations>].
  46. Castaneda-Babarro A, Coca A, Arbillaga-Etxarri A, Gutierrez-Santamaria B. Physical activity change during COVID-19 confinement. *International Journal of Environmental Research and Public Health.* 2020;17(18):1-10.
  47. Jarvis CI, Van Zandvoort K, Gimma A, Prem K, Klepac P, Rubin GJ, et al. Quantifying the impact of physical distance measures on the transmission of COVID-19 in the UK. *BMC medicine.* 2020;18:1-10.
  48. Juni P, Rothenbuhler M, Bobos P, Thorpe KE, da Costa BR, Fisman DN, et al. Impact of climate and public health interventions on the COVID-19 pandemic: a prospective cohort study. *CMAJ.* 2020;192(21):E566-E73.
  49. Khanna RC, Cicinelli MV, Gilbert SS, Honavar SG, Murthy GSV. COVID-19 pandemic: Lessons learned and future directions. *Indian journal of ophthalmology.* 2020;68(5):703-10.
  50. Lai CKC, Ng RWY, Wong MCS, Chong KC, Yeoh YK, Chen Z, et al. Epidemiological characteristics of the first 100 cases of coronavirus disease 2019 (COVID-19) in Hong Kong Special Administrative Region, China, a city with a stringent containment policy. *Int J Epidemiol.* 2020;49(4):1096-105.
  51. Lasry A, Kidder D, Hast M, Poovey J, Sunshine G, Winglee K, et al. Timing of Community Mitigation and Changes in Reported COVID-19 and Community Mobility - Four U.S. Metropolitan Areas, February 26-April 1, 2020. *Mmwr.* 2020;Morbidity and mortality weekly report. 69(15):451-7.

- 1  
2  
3 52. Munayco CV, Tariq A, Rothenberg R, Soto-Cabezas GG, Reyes MF, Valle A, et al. Early  
4 transmission dynamics of COVID-19 in a southern hemisphere setting: Lima-Peru: February  
5 29<sup>th</sup>-March 30<sup>th</sup>, 2020. *Infectious Disease Modelling*. 2020;5:338-45.
- 6 53. Patel P, Athotra A, Vaisakh TP, Dikid T, Jain SK. Impact of nonpharmacological  
7 interventions on COVID-19 transmission dynamics in India. *Indian journal of public health*.  
8 2020;64(Supplement):S142-S6.
- 9 54. Saez M, Tobias A, Varga D, Barceló MA. Effectiveness of the measures to flatten the  
10 epidemic curve of COVID-19. The case of Spain. *Science of the Total Environment*.  
11 2020;727:138761.
- 12 55. Vokó Z, Pitter JG. The effect of social distance measures on COVID-19 epidemics in Europe:  
13 an interrupted time series analysis. *GeroScience*. 2020;42(4):1075-82.
- 14 56. Wilasang C, Sararat C, Jitsuk NC, Yolai N, Thammawijaya P, Auewarakul P, et al.  
15 Reduction in effective reproduction number of COVID-19 is higher in countries employing active  
16 case detection with prompt isolation. *Journal of travel medicine*. 2020;08.
- 17 57. Yehya N, Venkataramani A, Harhay MO. Statewide Interventions and Covid-19 Mortality in  
18 the United States: An Observational Study. *Clinical infectious diseases : an official publication of the*  
19 *Infectious Diseases Society of America*. 2020;08.
- 20 58. Zhang R, Li Y, Zhang AL, Wang Y, Molina MJ. Identifying airborne transmission as the  
21 dominant route for the spread of COVID-19. *Proc Natl Acad Sci U S A*. 2020;117(26):14857-63.
- 22  
23  
24  
25  
26  
27  
28  
29  
30  
31  
32  
33  
34  
35  
36  
37  
38  
39  
40  
41  
42  
43  
44  
45  
46  
47  
48  
49  
50  
51  
52  
53  
54  
55  
56  
57  
58  
59  
60

1  
2  
3 **Figure 1. PRISMA flow diagram of literature search and selection**  
4  
5  
6  
7  
8  
9

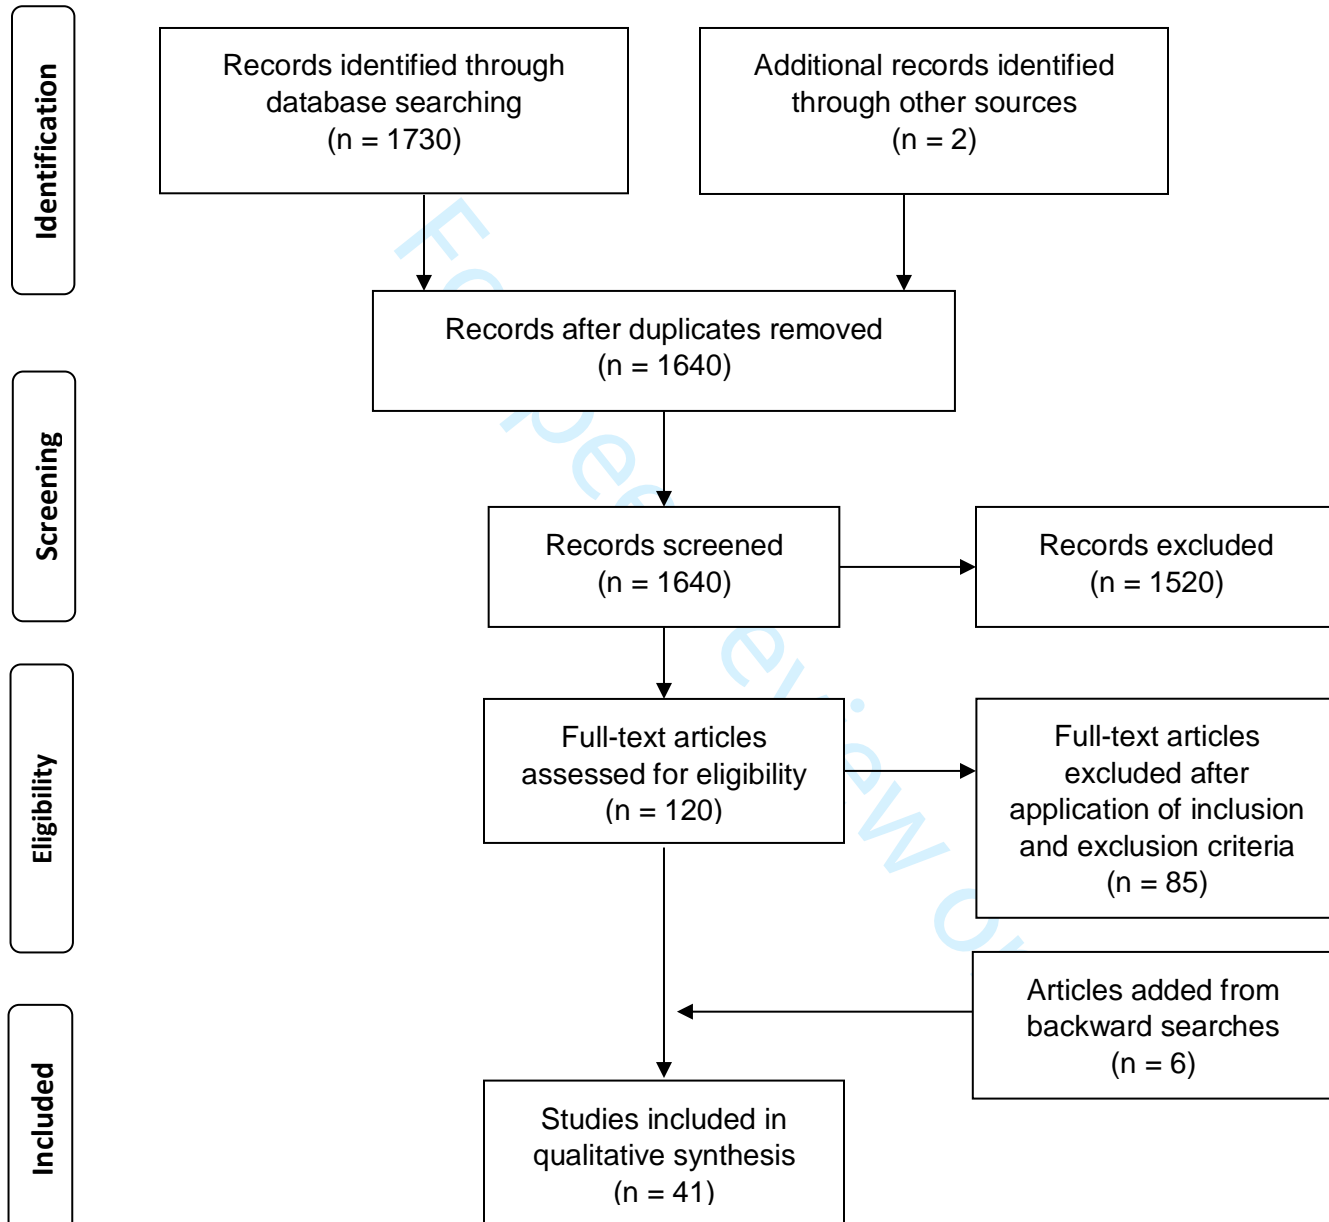

**Databases and search period:**

7 databases were selected and searched through Ovid platform.

**AMED (Allied and Complementary Medicine)** 1985 to September 2020, **Embase** 1910 to Present, **Global Health** 1973 to 2020 Week 40, **Ovid MEDLINE(R)** 1946 to September 30, 2020, **Ovid Nursing Database** 1946 to September Week 4 2020, **APA PsycInfo** 1806 to September Week 4 2020, **Social Work Abstracts** 1968 to September 2020

**Search terms:**

Sensitive search was conducted using these syntax, which included a higher number of articles (compared with specific search). Duplicated articles were removed after the searches.

"COVID\*".m\_titl. AND social distan\*.ab.

"COVID\*".m\_titl. AND physical distan\*.ab

"SARS-CoV-2\*".m\_titl. AND (social distan\* or physical distan\*).ab.

review only

## Preferred Reporting Items for Systematic reviews and Meta-Analyses extension for Scoping Reviews (PRISMA-ScR) Checklist

| SECTION                                               | ITEM | PRISMA-ScR CHECKLIST ITEM                                                                                                                                                                                                                                                                                  | REPORTED ON PAGE #                        |
|-------------------------------------------------------|------|------------------------------------------------------------------------------------------------------------------------------------------------------------------------------------------------------------------------------------------------------------------------------------------------------------|-------------------------------------------|
| <b>TITLE</b>                                          |      |                                                                                                                                                                                                                                                                                                            |                                           |
| Title                                                 | 1    | Identify the report as a scoping review.                                                                                                                                                                                                                                                                   | 1                                         |
| <b>ABSTRACT</b>                                       |      |                                                                                                                                                                                                                                                                                                            |                                           |
| Structured summary                                    | 2    | Provide a structured summary that includes (as applicable): background, objectives, eligibility criteria, sources of evidence, charting methods, results, and conclusions that relate to the review questions and objectives.                                                                              | 2                                         |
| <b>INTRODUCTION</b>                                   |      |                                                                                                                                                                                                                                                                                                            |                                           |
| Rationale                                             | 3    | Describe the rationale for the review in the context of what is already known. Explain why the review questions/objectives lend themselves to a scoping review approach.                                                                                                                                   | 4-5                                       |
| Objectives                                            | 4    | Provide an explicit statement of the questions and objectives being addressed with reference to their key elements (e.g., population or participants, concepts, and context) or other relevant key elements used to conceptualize the review questions and/or objectives.                                  | 5                                         |
| <b>METHODS</b>                                        |      |                                                                                                                                                                                                                                                                                                            |                                           |
| Protocol and registration                             | 5    | Indicate whether a review protocol exists; state if and where it can be accessed (e.g., a Web address); and if available, provide registration information, including the registration number.                                                                                                             | <a href="#">Click here to enter text.</a> |
| Eligibility criteria                                  | 6    | Specify characteristics of the sources of evidence used as eligibility criteria (e.g., years considered, language, and publication status), and provide a rationale.                                                                                                                                       | 6                                         |
| Information sources*                                  | 7    | Describe all information sources in the search (e.g., databases with dates of coverage and contact with authors to identify additional sources), as well as the date the most recent search was executed.                                                                                                  | 6                                         |
| Search                                                | 8    | Present the full electronic search strategy for at least 1 database, including any limits used, such that it could be repeated.                                                                                                                                                                            | 6                                         |
| Selection of sources of evidence†                     | 9    | State the process for selecting sources of evidence (i.e., screening and eligibility) included in the scoping review.                                                                                                                                                                                      | 6-7                                       |
| Data charting process‡                                | 10   | Describe the methods of charting data from the included sources of evidence (e.g., calibrated forms or forms that have been tested by the team before their use, and whether data charting was done independently or in duplicate) and any processes for obtaining and confirming data from investigators. | 7                                         |
| Data items                                            | 11   | List and define all variables for which data were sought and any assumptions and simplifications made.                                                                                                                                                                                                     | 8                                         |
| Critical appraisal of individual sources of evidence§ | 12   | If done, provide a rationale for conducting a critical appraisal of included sources of evidence; describe the methods used and how this information was used in any data synthesis (if appropriate).                                                                                                      | <a href="#">Click here to enter text.</a> |

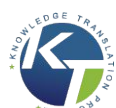



| SECTION                                       | ITEM | PRISMA-ScR CHECKLIST ITEM                                                                                                                                                                       | REPORTED ON PAGE #        |
|-----------------------------------------------|------|-------------------------------------------------------------------------------------------------------------------------------------------------------------------------------------------------|---------------------------|
| Synthesis of results                          | 13   | Describe the methods of handling and summarizing the data that were charted.                                                                                                                    | 7                         |
| <b>RESULTS</b>                                |      |                                                                                                                                                                                                 |                           |
| Selection of sources of evidence              | 14   | Give numbers of sources of evidence screened, assessed for eligibility, and included in the review, with reasons for exclusions at each stage, ideally using a flow diagram.                    | 7                         |
| Characteristics of sources of evidence        | 15   | For each source of evidence, present characteristics for which data were charted and provide the citations.                                                                                     | 8-13, 24-35               |
| Critical appraisal within sources of evidence | 16   | If done, present data on critical appraisal of included sources of evidence (see item 12).                                                                                                      | Click here to enter text. |
| Results of individual sources of evidence     | 17   | For each included source of evidence, present the relevant data that were charted that relate to the review questions and objectives.                                                           | 24-35                     |
| Synthesis of results                          | 18   | Summarize and/or present the charting results as they relate to the review questions and objectives.                                                                                            | 8-13, 36-37               |
| <b>DISCUSSION</b>                             |      |                                                                                                                                                                                                 |                           |
| Summary of evidence                           | 19   | Summarize the main results (including an overview of concepts, themes, and types of evidence available), link to the review questions and objectives, and consider the relevance to key groups. | 13-14                     |
| Limitations                                   | 20   | Discuss the limitations of the scoping review process.                                                                                                                                          | 18                        |
| Conclusions                                   | 21   | Provide a general interpretation of the results with respect to the review questions and objectives, as well as potential implications and/or next steps.                                       | 19                        |
| <b>FUNDING</b>                                |      |                                                                                                                                                                                                 |                           |
| Funding                                       | 22   | Describe sources of funding for the included sources of evidence, as well as sources of funding for the scoping review. Describe the role of the funders of the scoping review.                 | 20                        |

JBI = Joanna Briggs Institute; PRISMA-ScR = Preferred Reporting Items for Systematic reviews and Meta-Analyses extension for Scoping Reviews.

\* Where *sources of evidence* (see second footnote) are compiled from, such as bibliographic databases, social media platforms, and Web sites.

† A more inclusive/heterogeneous term used to account for the different types of evidence or data sources (e.g., quantitative and/or qualitative research, expert opinion, and policy documents) that may be eligible in a scoping review as opposed to only studies. This is not to be confused with *information sources* (see first footnote).

‡ The frameworks by Arksey and O'Malley (6) and Levac and colleagues (7) and the JBI guidance (4, 5) refer to the process of data extraction in a scoping review as data charting.

§ The process of systematically examining research evidence to assess its validity, results, and relevance before using it to inform a decision. This term is used for items 12 and 19 instead of "risk of bias" (which is more applicable to systematic reviews of interventions) to include and acknowledge the various sources of evidence that may be used in a scoping review (e.g., quantitative and/or qualitative research, expert opinion, and policy document).

From: Tricco AC, Lillie E, Zarin W, O'Brien KK, Colquhoun H, Levac D, et al. PRISMA Extension for Scoping Reviews (PRISMA-ScR): Checklist and Explanation. *Ann Intern Med.* 2018;169:467–473. doi: [10.7326/M18-0850](https://doi.org/10.7326/M18-0850).



St. Michael's

Inspired Care.  
Inspiring Science.

For peer review only - <http://bmjopen.bmj.com/site/about/guidelines.xhtml>
