# Supplementary material for: Effectiveness of different types and levels of social distancing measures: a scoping review of global evidence from earlier stage of COVID-19 pandemic
Source: PubMed Central journal article supplement — BMJ Open. 2022 Apr 10;12(4):e053938. doi: 10.1136/bmjopen-2021-053938 (PMC9002256; doi:10.1136/bmjopen-2021-053938), 2022-04-10
Supplement: bmjopen-2021-053938supp001.pdf [file bmjopen-2021-053938supp001.pdf]

**Databases and search period:**

7 databases were selected and searched through Ovid platform.

**AMED (Allied and Complementary Medicine)** 1985 to September 2020, **Embase** 1910 to Present, **Global Health** 1973 to 2020 Week 40, **Ovid MEDLINE(R)** 1946 to September 30, 2020, **Ovid Nursing Database** 1946 to September Week 4 2020, **APA PsycInfo** 1806 to September Week 4 2020, **Social Work Abstracts** 1968 to September 2020

**Search terms:**

Sensitive search was conducted using these syntax, which included a higher number of articles (compared with specific search). Duplicated articles were removed after the searches.

"COVID\*" .m\_titl. AND social distan\* .ab.

"COVID\*" .m\_titl. AND physical distan\* .ab

"SARS-CoV-2\*" .m\_titl. AND (social distan\* or physical distan\* ) .ab.
